# Supplementary material for: Rhodium-catalyzed cascade C–H activation/annulation/1,6-acyl migration: direct construction of free N–H indoles under mild conditions
Source: Royal Society of Chemistry journal article supplement (doi:10.1039/d2nj00508e), 2022-01-01
Supplement: d2nj00508e1.pdf [file d2nj00508e1.pdf]

*Supplementary Information*

**Rhodium-catalyzed cascade C–H activation/annulation/1,6-acyl migration: Direct construction of free N–H indoles under mild conditions**

Raju S. Thombal, Mohammad Aslam, Sonaimuthu Mohandoss, and Yong Rok Lee\*

School of Chemical Engineering, Yeungnam University, Gyeongsan 38541, Republic of Korea.

E-mail: yrlee@yu.ac.kr; Fax: +82-53-810-4631; Tel: +82-53-810-2529.

## TABLE OF CONTENTS

|                                                                                  |            |
|----------------------------------------------------------------------------------|------------|
| <b>General remarks</b>                                                           | <b>S3</b>  |
| <b>General procedure for the synthesis of 3, 4, 7 and 8</b>                      | <b>S4</b>  |
| <b>Control experiments:</b>                                                      | <b>S4</b>  |
| <b>i) Deuterium exchange</b>                                                     | <b>S4</b>  |
| <b>ii) KIE experiment</b>                                                        | <b>S5</b>  |
| <b>iii) Acyl migration experiment</b>                                            | <b>S6</b>  |
| <b>iv) Reaction of extended alcohol</b>                                          | <b>S6</b>  |
| <b>Study of fluorescent probes</b>                                               | <b>S6</b>  |
| <b>References</b>                                                                | <b>S9</b>  |
| <b>Characterization data of synthesized compounds</b>                            | <b>S10</b> |
| <b><sup>1</sup>H NMR and <sup>13</sup>C NMR spectra of synthesized compounds</b> | <b>S21</b> |
| <b>X-ray structure and data of compound 3a</b>                                   | <b>S43</b> |

**General remarks**

All experiments were carried out under an open atmosphere. Unless otherwise noted, solvents were purchased from commercial suppliers and used without further purification. The substituted acetanilides were synthesized according to the reported procedure.<sup>1</sup> The alkyne coupling partners were purchased from Sigma Aldrich and Alfa aesar. Merck precoated silica gel plates (Art. 5554) treated with a fluorescent indicator were used for analytical thin-layer chromatography (TLC). Column chromatography was performed using silica gel 9385 (Merck) and ethyl acetate/hexane (1:9) were used as the solvents. Melting points are uncorrected and were determined using Fisher-Johns Melting Point Apparatus. <sup>1</sup>H NMR and <sup>13</sup>C NMR spectra were recorded on VNS (600 and 150 MHz) spectrometer at the core research support center for natural products and medical materials of Yeungnam University. The NMR spectra recorded in CDCl<sub>3</sub> using  $\delta = 7.24$  and 77.00 ppm as the solvent chemical shifts. All chemical shifts ( $\delta$ ) are expressed in units of ppm and *J* values are given in Hz. Multiplicities are abbreviated as follows: s = singlet, d = doublet, t = triplet, q = quartet, m = multiplet or overlap of nonequivalent resonances, and dd = doublet of doublets. Infrared (IR) spectra were recorded on a PerkinElmer Spectrum Two<sup>TM</sup> IR spectrometer with frequencies expressed in cm<sup>-1</sup>, and high-resolution mass spectrometry (HRMS) was carried out using Thermo Fisher Q exactive orbitrap mass spectrometer at the core research support center for natural products and medical materials of Yeungnam University. The crystal structure of the crystal was determined by single-crystal diffraction methods at the Korea Basic Science Institute (KBSI, Western Seoul Center, Korea).

### **General procedure for the synthesis of 3, 4, 7, and 8.**

A mixture of acetanilide **1** (1 mmol), alkyne **2** (1 mmol), [RhCp\*Cl<sub>2</sub>]<sub>2</sub> (1 mol%), AgSbF<sub>6</sub> (10 mol%), and Cu(OAc)<sub>2</sub> (30 mol%) was stirred in acetone (4 mL) at 40 °C for described time. When the reaction was complete as indicated by TLC, the volatiles was removed in vacuo and the residue was purified by silica gel column chromatography (EtOAc/Hexane= 1:9) to obtain the desired products.

## Control experiments

### i) Deuterium exchange:

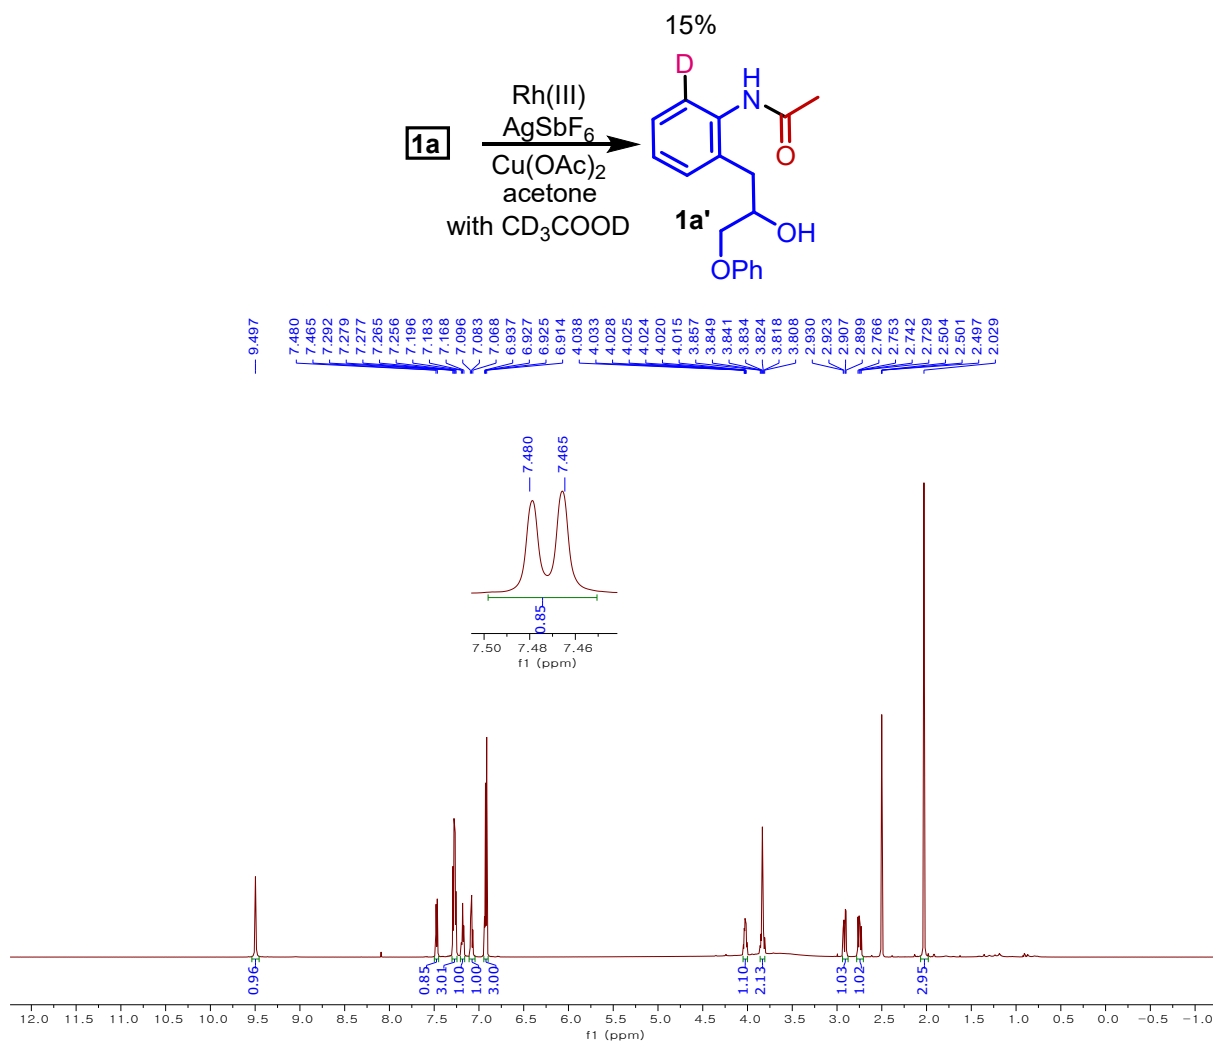

## ii) KIE experiment:

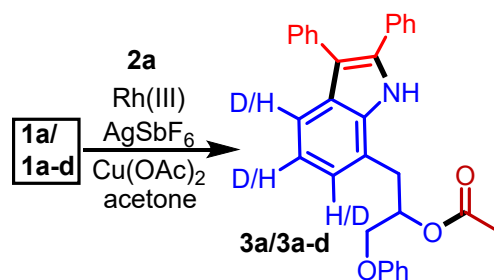

In two different sets of reactions, the reaction of **1a** or **1a-d** with **2a** was carried out at standard reaction condition for 8h. After that, both reaction mixtures were combined, and the solvent was removed under reduced pressure. The residue was purified by silica gel chromatography (EtOAc/Hexanes) to afford the product. The KIE was calculated from <sup>1</sup>H NMR analysis.

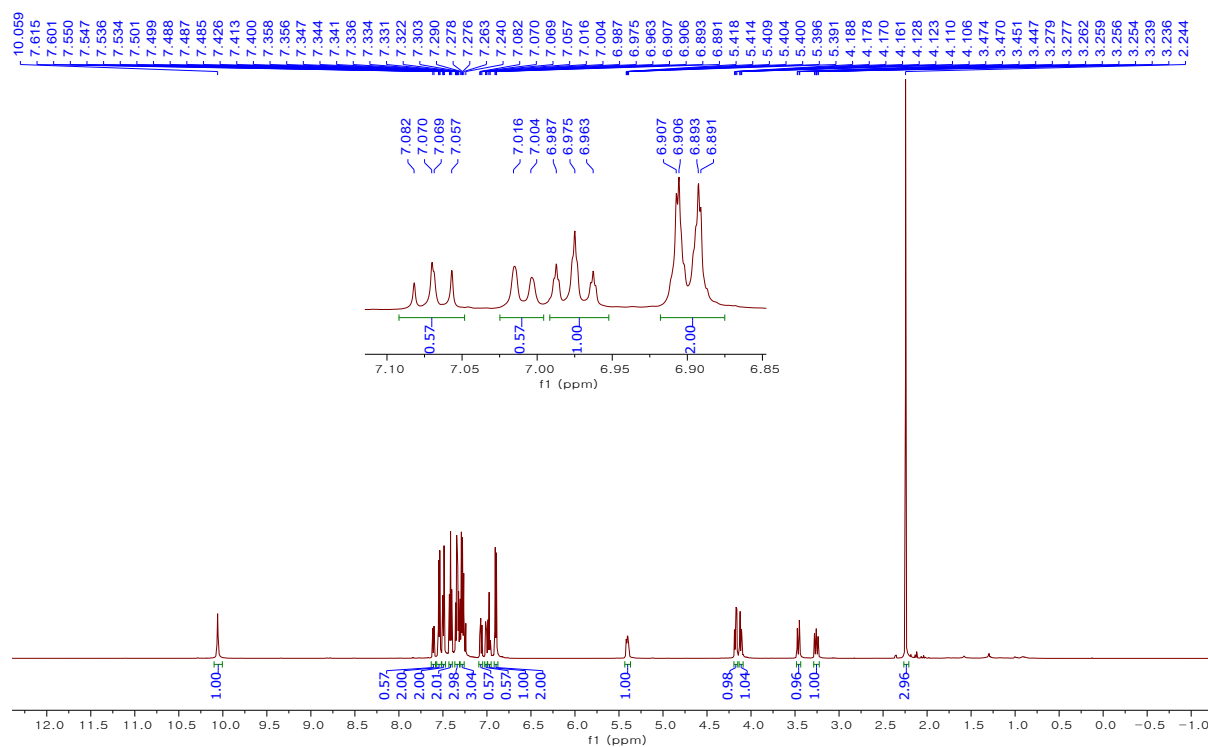

### iii) Acyl migration experiment:

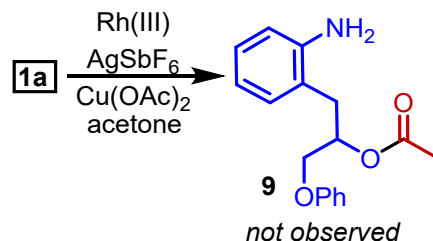

### iv) Reaction of extended alcohol:

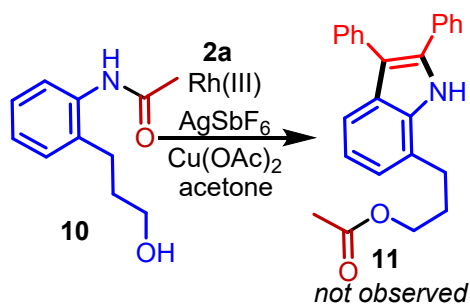

## Study of fluorescent probes

### Stock solution preparation for spectral detection

Stock solutions of the chloride salts of Ag<sup>+</sup>, Ba<sup>2+</sup>, Ca<sup>2+</sup>, Cd<sup>2+</sup>, Ce<sup>3+</sup>, Cu<sup>2+</sup>, Co<sup>2+</sup>, Fe<sup>3+</sup>, Hg<sup>2+</sup>, Mn<sup>2+</sup>, Na<sup>+</sup>, Ni<sup>2+</sup>, Pb<sup>2+</sup>, Sn<sup>2+</sup>, Sr<sup>2+</sup>, Ti<sup>3+</sup>, and Zn<sup>2+</sup> in 10 mM aqueous solutions were prepared. A stock solution of **3a**, **3f**, and **3j** (5 mM) was prepared in Ethanol-water, 1:1 (v/v) HEPES buffer solution (10 mM, pH = 7.4). The working solutions of **3a**, **3f**, and **3j** were freshly prepared by diluting the highly concentrated stock solution to the desired concentration before spectroscopic measurements.

### UV-vis and fluorescence spectral studies

All experiments were carried out in Ethanol-water, 1:1 (v/v) HEPES buffer solution (10 mM, pH = 7.4). In all of the spectroscopy experiments, the spectral data were recorded 5 min after the addition of the ions. To investigate the metal ion selectivity, the test samples were prepared

by placing 25  $\mu\text{L}$  of the cation stock solution in 25  $\mu\text{L}$  of the **3a** solution (5 mM) with 1.95 mL of Ethanol-water, 1:1 (v/v) HEPES buffer solution (10 mM, pH = 7.4). For the fluorescence measurements, excitation was provided at 310 nm, and the emission was collected from 320 to 650 nm.

### Spectroscopic responses of chemosensor

The spectroscopic properties of receptors **3a**, **3f**, and **3j** (5 mM) in Ethanol-water, 1:1 (v/v) HEPES buffer solution (10 mM, pH = 7.4) was first assessed using the UV-vis and fluorescence spectra (Fig. S1). As shown in Fig. S1a, receptors **3a**, **3f**, and **3j** presented two major absorption bands at 250 and 310 nm corresponding to the  $\pi$ - $\pi^*$  and  $n$ - $\pi^*$  transitions. On the other hand, the fluorescence responses of receptors **3a**, **3f**, and **3j** have subsequently investigated fluorescence at 408 nm, when excited at 310 nm as shown in Fig. S1b. In this regard, we have studied the highest fluorescent ability to representative example receptor **3a**; indoles bearing acyl and N-H coordination sites have been utilized as potent fluorescent probes for the selective sensing of metal ions.<sup>2</sup> We firstly studied the UV-Visible and fluorescence spectral response selectivity experiment of receptor **3a** toward 17 common metal ions ( $\text{Ag}^+$ ,  $\text{Ba}^{2+}$ ,  $\text{Ca}^{2+}$ ,  $\text{Cd}^{2+}$ ,  $\text{Ce}^{3+}$ ,  $\text{Cu}^{2+}$ ,  $\text{Co}^{2+}$ ,  $\text{Fe}^{3+}$ ,  $\text{Hg}^{2+}$ ,  $\text{Mn}^{2+}$ ,  $\text{Na}^+$ ,  $\text{Ni}^{2+}$ ,  $\text{Pb}^{2+}$ ,  $\text{Sn}^{2+}$ ,  $\text{Sr}^{2+}$ ,  $\text{Ti}^{3+}$ , and  $\text{Zn}^{2+}$ ) in 10 mM aqueous solutions (Fig. 1a,b). The absorption peak became broad with absorption intensity at 310 nm increased only with the presence of  $\text{Fe}^{3+}$  ions (Fig. 1a). Moreover, upon the addition of various metal ions to the receptor **3a** remarkably displayed excellent “turn-off” response toward only  $\text{Fe}^{3+}$  ions with significant wavelength shift at 418 nm ( $\lambda_{\text{ex}} = 310$  nm) and the other co-existing metal ions did not induce any major changes in fluorescence emission nature (Fig. 1b).<sup>3</sup> All of these indicating that **3a** coordinates with  $\text{Fe}^{3+}$  ions to form the complex (**3a-Fe<sup>3+</sup>**) (Fig. 1c).

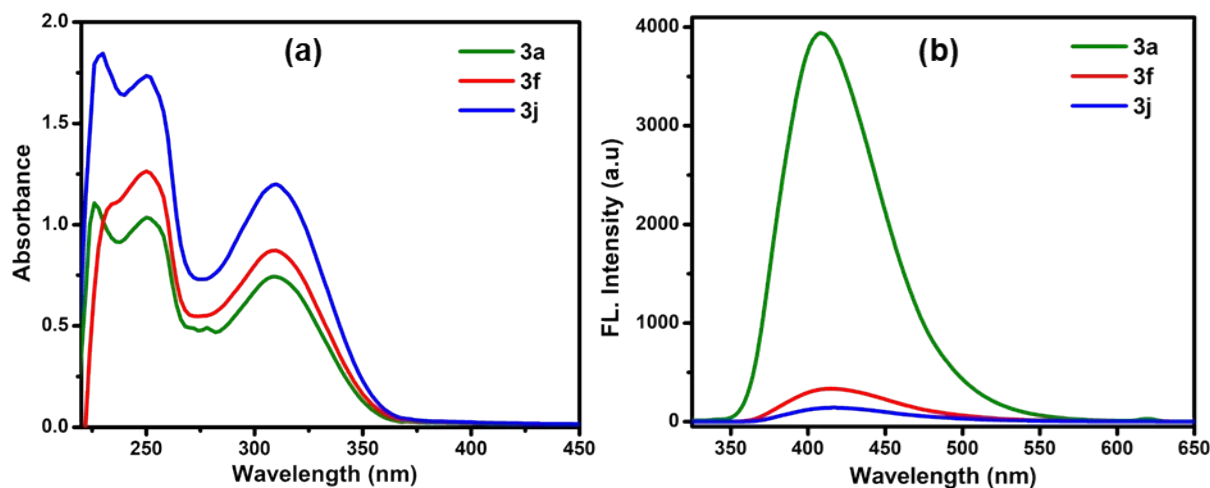

**Fig. S1.** (a) UV–Vis absorption and (b) fluorescence emission spectra changes of the receptor **3a**, **3f**, and **3j** (5 mM) in Ethanol-water, 1:1 (v/v) HEPES buffer solution (10 mM, pH = 7.4). The relationship between the fluorescence quenching ( $F_0/F$ ) and the concentration of the  $Fe^{3+}$  quencher, as shown in Fig. 1d, is consistent with the Stern–Volmer relationship.<sup>4</sup> There was a good linear correlation between the emission intensity and  $Fe^{3+}$  ions concentrations in the range (0–5.5 mM) with correlation coefficients ( $R^2 = 0.9077$ ). The detection limit of  $Fe^{3+}$  ions was obtained by plotting a graph between the relative emission intensity at 408/418 nm as a function of the  $Fe^{3+}$  concentration. Based on  $LOD = K \times SD/S$ , the limit of detection of **3a** for  $Fe^{3+}$  was 2.8  $\mu$ M (Fig. S2).<sup>4</sup>



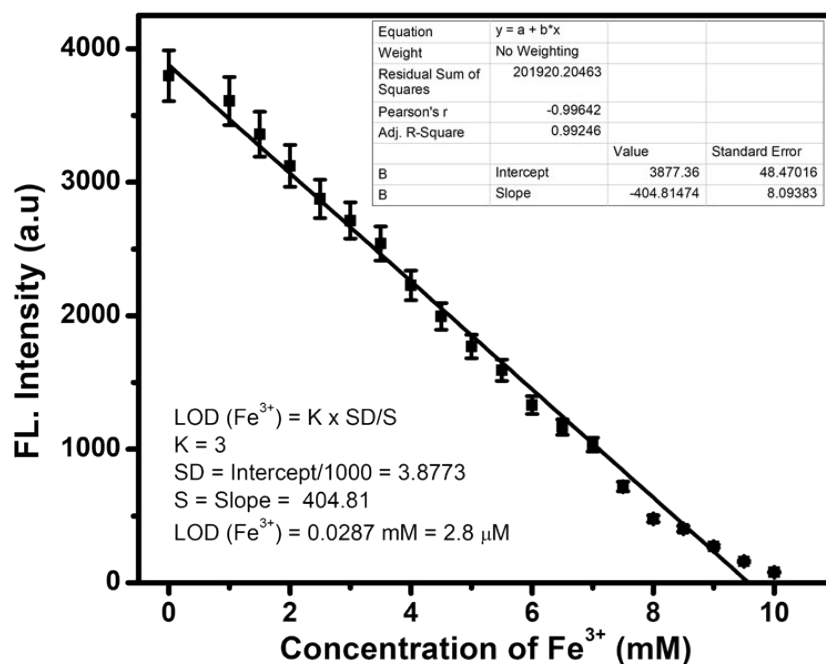

**Fig. S2.** Calibration curve of **3a** in the presence of  $Fe^{3+}$  ions using the monitored emission wavelength at 408 nm (**3a**- $Fe^{3+}$ ) complex systems. The detection limit (LOD) was determined from the following equation:  $LOD = K \times SD/S$ , where  $K = 3$ ; SD is the standard deviation of the blank solution; S is the slope of the calibration curve.

## References

1. R. S. Thombal, T. Feoktistova, G. A. González-Montiel, P. H.-Y. Cheong and Y. R. Lee, *Chem. Sci.*, 2020, **11**, 7260-7265.
2. S.K. Sahoo and G. Crisponi. *Molecules*, 2019, **24**, 3267.
3. A. Kuwar, R. Patil, A. Singh, S.K.Sahoo, J. Marek, and N. Singh, *J. Mat. Chem. C.*, 2015, **3**, 453-460.
4. S. Mohandoss, R. Atchudan, T. N. J. I. Edison, K. Mishra, R. J. I. Tamargo, S. Palanisamy, K. Yelithao, S. You, and Y. R. Lee, *Sens. & Actuat. B: Chem.*, 2020, **306**, 127581.

## Characterization data of synthesized compounds

### 1-(2,3-Diphenyl-1*H*-indol-7-yl)-3-phenoxypropan-2-yl acetate (3a)

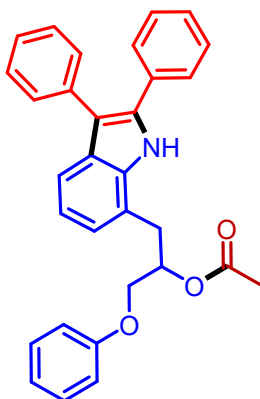

The title compound was prepared according to the general procedure. The product was obtained as a white solid. Yield: 86% (398 mg); mp 94-96 °C. <sup>1</sup>H NMR (600 MHz, CDCl<sub>3</sub>) δ 10.09 (1H, s), 7.64 (1H, d, *J* = 8.0 Hz), 7.58 (2H, d, *J* = 8.3 Hz), 7.53 (2H, d, *J* = 8.1 Hz), 7.45 – 7.42 (2H, m), 7.38 – 7.34 (3H, m), 7.34 – 7.24 (3H, m), 7.10 (1H, t, *J* = 8.2 Hz), 7.04 (1H, d, *J* = 7.1 Hz), 7.00 (1H, t, *J* = 7.5 Hz), 6.92 (2H, d, *J* = 8.1 Hz), 5.44 – 5.41 (1H, m), 4.21 – 4.18 (1H, m), 4.13 (1H, d, *J* = 9.9 Hz), 3.48 (1H, d, *J* = 13.7 Hz), 3.28 (1H, dd, *J* = 13.8, 10.8 Hz), 2.26 (3H, s); <sup>13</sup>C NMR (150 MHz, CDCl<sub>3</sub>) δ 172.4, 158.3, 135.4, 135.3, 134.3, 132.6, 130.2, 129.4, 128.9, 128.5, 128.5, 127.9, 127.4, 126.1, 123.4, 121.2, 120.3, 118.9, 118.8, 114.9, 114.6, 73.5, 67.1, 33.5, 21.3; IR (ATR) 3308, 2995, 1769, 1244, 745 cm<sup>-1</sup>; HRMS (EI) *m/z*: [M+H] Calcd for C<sub>31</sub>H<sub>28</sub>NO<sub>3</sub> 462.2063; Found 462.2060.

### 1-(2,3-Diphenyl-1*H*-indol-7-yl)-3-(*o*-tolylloxy)propan-2-yl acetate (3b)

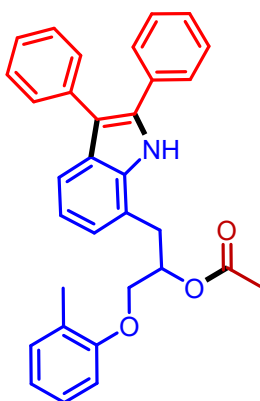

The title compound was prepared according to the general procedure. The product was obtained as a brown solid. Yield: 85% (405 mg); mp 142-144 °C. <sup>1</sup>H NMR (600 MHz, CDCl<sub>3</sub>) δ 10.06 (1H, s), 7.61 (1H, d, *J* = 8.0 Hz), 7.54 (2H, d, *J* = 8.7 Hz), 7.49 (2H, d, *J* = 8.1 Hz), 7.40 (1H, d, *J* = 9 Hz), 7.35 – 7.27 (4H, m), 7.16 (1H, d, *J* = 7.4 Hz), 7.12 (1H, t, *J* = 8.0 Hz), 7.07 (1H, t, *J* = 8.2 Hz), 7.01 (1H, d, *J* = 7.0 Hz), 6.89 (1H, t, *J* = 7.4 Hz), 6.75 (1H, d, *J* = 8.2 Hz), 5.42 – 5.39 (1H, m), 4.20 – 4.09 (2H, m), 3.46 (1H, d, *J* = 13.6 Hz), 3.29 (1H, dd, *J* = 12.8, 10.3 Hz), 2.28 (3H, s), 2.23 (3H, s); <sup>13</sup>C NMR (150 MHz, CDCl<sub>3</sub>) δ 172.4, 156.4, 135.3, 135.2, 134.3, 132.6, 130.7, 130.2, 128.9, 128.6, 128.5, 127.9, 127.4, 126.8, 126.7, 126.1, 123.4, 120.9, 120.3, 118.9, 118.8, 114.9, 111.2, 73.6, 67.2, 33.5, 21.3, 16.2; IR (ATR) 3327, 2994, 1769, 1241, 744 cm<sup>-1</sup>; HRMS (EI) *m/z*: [M+H] Calcd for C<sub>32</sub>H<sub>30</sub>NO<sub>3</sub> 476.2220; Found 476.2218.

### 1-(4-(*tert*-Butyl)phenoxy)-3-(2,3-diphenyl-1*H*-indol-7-yl)propan-2-yl acetate (3c)

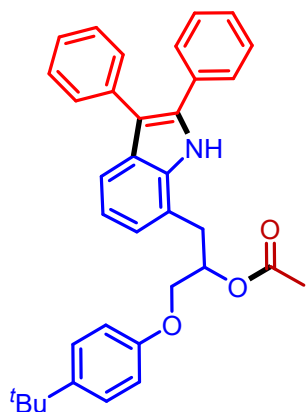

The title compound was prepared according to the general procedure. The product was obtained as a brown solid. Yield: 84% (435 mg); mp 128-130 °C. <sup>1</sup>H NMR (600 MHz, CDCl<sub>3</sub>) δ 10.02 (1H, s), 7.59 (1H, d, *J* = 8.0 Hz), 7.52 (2H, d, *J* = 7.3 Hz), 7.47 (2H, d, *J* = 8.4 Hz), 7.40 (2H, t, *J* = 7.5 Hz), 7.33 – 7.24 (6H, m), 7.05 (1H, t, *J* = 7.4 Hz), 7.00 (1H, d, *J* = 6.7 Hz), 6.82 (2H, d, *J* = 8.9 Hz), 5.39 – 5.35 (1H, m), 4.16 – 4.14 (1H, m), 4.08 (1H, dd, *J* = 10.8, 2.4 Hz), 3.44 (1H, d, *J* = 13.9 Hz), 3.25 (1H, dd, *J* = 13.8, 10.7 Hz), 2.22 (3H, s), 1.29 (9H, s); <sup>13</sup>C NMR (150 MHz, CDCl<sub>3</sub>) δ 172.3, 156.0, 143.9, 135.4, 135.3, 134.3, 132.6, 130.2, 128.9, 128.5, 128.5, 127.9, 127.4, 126.2, 126.1, 123.4, 120.2, 118.9, 118.8, 114.9, 114.1, 73.5, 67.2, 34.0, 33.5, 31.4, 21.4; IR (ATR) 3305, 2994, 1769, 1243, 1056, 698 cm<sup>-1</sup>; HRMS (EI) *m/z*: [M+H] Calcd for C<sub>35</sub>H<sub>36</sub>NO<sub>3</sub> 518.2689; Found 518.2690.

### 1-(4-Chlorophenoxy)-3-(2,3-diphenyl-1*H*-indol-7-yl)propan-2-yl acetate (3d)

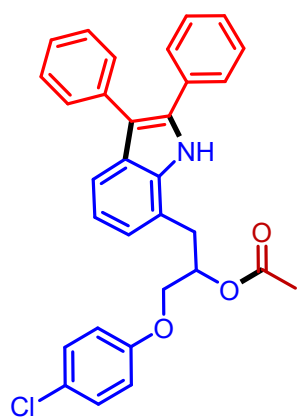

The title compound was prepared according to the general procedure. The product was obtained as a white solid. Yield: 79% (392 mg); mp 150-152 °C. <sup>1</sup>H NMR (600 MHz, CDCl<sub>3</sub>) δ 10.04 (1H, s), 7.63 (1H, d, *J* = 8.0 Hz), 7.56 (2H, d, *J* = 7.6 Hz), 7.51 (2H, d, *J* = 7.6 Hz), 7.43 (2H, t, *J* = 7.6 Hz), 7.37-7.30 (4H, m), 7.22 (2H, d, *J* = 8.6 Hz), 7.08 (1H, t, *J* = 7.5 Hz), 7.00 (1H, d, *J* = 7.0 Hz), 6.81 (2H, d, *J* = 8.7 Hz), 5.41-5.37 (1H, m), 4.13 (1H, dd, *J* = 10.6, 5.8 Hz), 4.07 (1H, dd, *J* = 10.6, 2.4 Hz), 3.46 (1H, d, *J* = 13.8 Hz), 3.22 (1H, dd, *J* = 13.8, 10.8 Hz), 2.25 (3H, s); <sup>13</sup>C NMR (150 MHz, CDCl<sub>3</sub>) δ 172.3, 156.9, 135.3, 135.2, 134.3, 132.5, 130.2, 129.3, 129.0, 128.5, 128.5, 127.9, 127.4, 126.2, 126.1, 123.3, 120.3, 118.9, 118.7, 115.8, 115.0, 73.3, 67.5, 33.5, 21.3; IR (ATR) 3353, 2995, 1769, 1489, 1238, 752 cm<sup>-1</sup>; HRMS (EI) *m/z*: [M+H] Calcd for C<sub>31</sub>H<sub>27</sub>ClNO<sub>3</sub> 496.1674; Found 496.1674.

### 1-(2,4-Dibromophenoxy)-3-(2,3-diphenyl-1H-indol-7-yl)propan-2-yl acetate (3e)

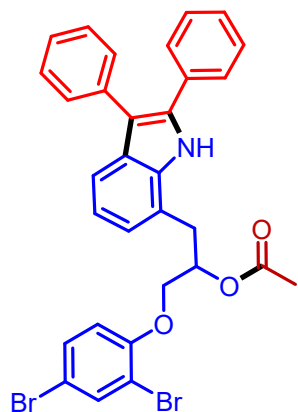

The title compound was prepared according to the general procedure. The product was obtained as a yellow solid. Yield: 77% (480 mg); mp 85-87 °C.  $^1\text{H}$  NMR (600 MHz,  $\text{CDCl}_3$ )  $\delta$  9.77 (1H, s), 7.63 (1H, d,  $J = 2.4$  Hz), 7.57 (1H, d,  $J = 7.9$  Hz), 7.47 (2H, d,  $J = 7.7$  Hz), 7.43 (2H, d,  $J = 7.5$  Hz), 7.37 (2H, t,  $J = 7.7$  Hz), 7.32 – 7.26 (5H, m), 7.04 (1H, t,  $J = 7.5$  Hz), 7.00 (1H, d,  $J = 7.0$  Hz), 6.64 (1H, d,  $J = 8.7$  Hz), 5.39 – 5.34 (1H, m), 4.14 (1H, dd,  $J = 10.6, 2.7$  Hz), 4.08 (1H, dd,  $J = 10.6, 5.3$  Hz), 3.43 (1H, dd,  $J = 13.8, 3.1$  Hz), 3.34 (1H, dd,  $J = 13.8, 10.4$  Hz), 2.19 (3H, s);  $^{13}\text{C}$  NMR (150 MHz,  $\text{CDCl}_3$ )  $\delta$  172.1, 154.0, 135.6, 135.2, 134.4, 132.5, 131.2, 131.1, 130.2, 129.0, 128.6, 128.5, 128.0, 127.5, 126.2, 123.4, 120.3, 118.9, 118.6, 115.0, 114.6, 113.7, 113.2, 73.0, 68.4, 33.1, 21.3; IR (ATR) 3330, 2996, 1769, 1244, 696  $\text{cm}^{-1}$ ; HRMS (EI)  $m/z$ :  $[\text{M}+\text{H}]$  Calcd for  $\text{C}_{31}\text{H}_{26}\text{Br}^{79}\text{Br}^{81}\text{NO}_3$  620.0253; Found 620.0250.

### 1-(*tert*-Butoxy)-3-(2,3-diphenyl-1H-indol-7-yl)propan-2-yl acetate (3f)

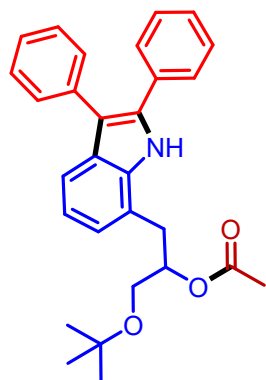

The title compound was prepared according to the general procedure. The product was obtained as a white solid. Yield: 80% (354 mg); mp 136-138 °C.  $^1\text{H}$  NMR (600 MHz,  $\text{CDCl}_3$ )  $\delta$  10.17 (1H, s), 7.60 (1H, d,  $J = 9.1$  Hz), 7.57 (2H, d,  $J = 8.4$  Hz), 7.49 (2H, d,  $J = 8.0$  Hz), 7.40 – 7.38 (2H, m), 7.35 – 7.33 (2H, m), 7.29 (2H, q,  $J = 8.6$  Hz), 7.09 – 7.06 (1H, m), 7.02 (1H, d,  $J = 9.6$  Hz), 5.12 – 5.10 (1H, m), 3.51 (2H, s), 3.30 (1H, d,  $J = 13.7$  Hz), 3.21 (1H, t,  $J = 13.1$  Hz), 2.19 (3H, s), 1.17 (9H, s);  $^{13}\text{C}$  NMR (150 MHz,  $\text{CDCl}_3$ )  $\delta$  172.1, 135.7, 135.5, 134.3, 132.8, 130.2, 128.7, 128.5, 128.4, 128.2, 127.4, 126.0, 123.5, 120.1, 119.6, 118.4, 114.8, 74.5, 73.6, 61.2, 33.3, 27.4, 21.4; IR (ATR) 3311, 2966, 1769, 1247, 696  $\text{cm}^{-1}$ ; HRMS (EI)  $m/z$ :  $[\text{M}+\text{H}]$  Calcd for  $\text{C}_{29}\text{H}_{32}\text{NO}_3$  442.2376; Found 442.2375.

### 1-Butoxy-3-(2,3-diphenyl-1H-indol-7-yl)propan-2-yl acetate (3g)

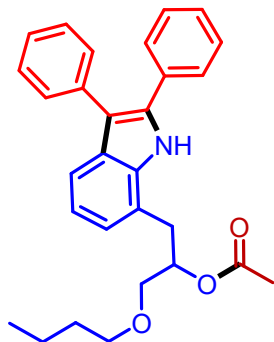

The title compound was prepared according to the general procedure. The product was obtained as a viscous oil. Yield: 82% (360 mg);  $^1\text{H}$  NMR (600 MHz,  $\text{CDCl}_3$ )  $\delta$  10.10 (s, 1H), 7.57 – 7.53 (3H, m), 7.47 – 7.45 (2H, m), 7.40 – 7.36 (2H, m), 7.35 – 7.31 (2H, m), 7.31 – 7.25 (2H, m), 7.05 (1H, td,  $J = 7.6, 2.5$  Hz), 6.99 (1H, d,  $J = 7.0$  Hz), 5.17 – 5.14 (1H, m), 3.60 – 3.57 (1H, m), 3.54 (1H, dt,  $J = 11.2, 2.7$  Hz), 3.51 – 3.46 (1H, m), 3.45 – 3.40 (1H, m), 3.30 (1H, d,  $J = 16.2$  Hz), 3.15 (1H, t,  $J = 12.0$  Hz), 2.20 (3H, s), 1.55 (2H, t,  $J = 6.4$  Hz), 1.36 – 1.32 (2H, m), 0.90 (3H, t,  $J = 7.4$  Hz);  $^{13}\text{C}$  NMR (150 MHz,  $\text{CDCl}_3$ )  $\delta$  172.2, 135.5, 135.5, 134.3, 132.7, 130.2, 128.8, 128.5, 128.4, 128.0, 127.4, 126.1, 123.5, 120.2, 119.3, 118.5, 114.9, 74.3, 71.5, 69.8, 33.3, 31.6, 21.4, 19.2, 13.8; IR (ATR) 3334, 2955, 1769, 1244, 696  $\text{cm}^{-1}$ ; HRMS (EI)  $m/z$ :  $[\text{M}+\text{H}]$  Calcd for  $\text{C}_{29}\text{H}_{32}\text{NO}_3$  442.2376; Found 442.2374.

### 1-(2,3-Diphenyl-1H-indol-7-yl)-3-phenylpropan-2-yl acetate (3h)

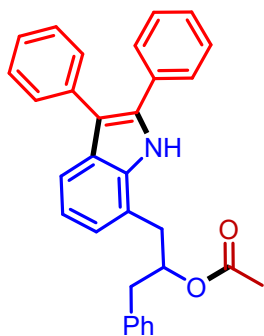

The title compound was prepared according to the general procedure. The product was obtained as a black solid. Yield: 78% (347 mg); mp 125-127  $^{\circ}\text{C}$ .  $^1\text{H}$  NMR (600 MHz,  $\text{CDCl}_3$ )  $\delta$  10.00 (1H, s), 7.50 (1H, d,  $J = 7.9$  Hz), 7.46 (2H, dd,  $J = 8.4, 1.2$  Hz), 7.40 (2H, dd,  $J = 8.0, 1.3$  Hz), 7.31 (2H, t,  $J = 7.7$  Hz), 7.24 – 7.21 (3H, m), 7.18 – 7.14 (3H, m), 7.12 – 7.07 (3H, m), 7.01 – 6.98 (1H, m), 6.95 (1H, d,  $J = 7.0$  Hz), 5.14 (1H, m), 3.36 (1H, dd,  $J = 13.6, 2.3$  Hz), 2.96 (1H, dd,  $J = 14.6, 3.2$  Hz), 2.90 – 2.82 (2H, m), 2.02 (3H, s);  $^{13}\text{C}$  NMR (150 MHz,  $\text{CDCl}_3$ )  $\delta$  172.5, 137.4, 135.5, 135.3, 134.2, 132.7, 130.2, 129.4, 128.9, 128.5, 128.5, 128.2, 127.9, 127.4, 126.4, 126.1, 123.3, 120.1, 119.6, 118.6, 114.9, 75.6, 39.0, 37.8, 21.3; IR (ATR) 3359, 2995, 1769, 1244, 696  $\text{cm}^{-1}$ ; HRMS (EI)  $m/z$ :  $[\text{M}+\text{H}]$  Calcd for  $\text{C}_{31}\text{H}_{28}\text{NO}_2$  446.2114; Found 446.2111.

### 2-(2,3-Diphenyl-1*H*-indol-7-yl)ethyl acetate (3i)

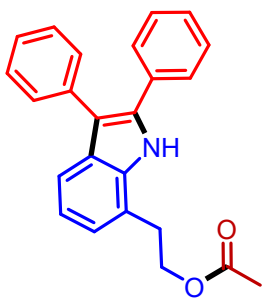

The title compound was prepared according to the general procedure. The product was obtained as a white solid. Yield: 87% (309 mg); mp 107-109 °C. <sup>1</sup>H NMR (600 MHz, CDCl<sub>3</sub>) δ 9.48 (1H, s), 7.56 (1H, d, *J* = 7.8 Hz), 7.52 (2H, d, *J* = 7.1 Hz), 7.46 – 7.44 (2H, m), 7.37 (2H, t, *J* = 7.7 Hz), 7.33 (2H, t, *J* = 7.5 Hz), 7.30 – 7.26 (2H, m), 7.06 (1H, t, *J* = 7.4 Hz), 7.02 (1H, d, *J* = 7.2 Hz), 4.45 – 4.41 (2H, m), 3.23 (2H, t, *J* = 7.7 Hz), 2.13 (3H, s); <sup>13</sup>C NMR (150 MHz, CDCl<sub>3</sub>) δ 172.1, 135.3, 135.2, 134.1, 132.7, 130.2, 128.9, 128.6, 128.5, 128.0, 127.5, 126.2, 122.8, 120.3, 119.6, 118.6, 115.1, 64.3, 31.8, 21.1; IR (ATR) 3366, 2926, 1712, 1255, 1027, 695 cm<sup>-1</sup>; HRMS (EI) *m/z*: [M+H] Calcd for C<sub>24</sub>H<sub>22</sub>NO<sub>2</sub> 356.1645; Found 356.1641.

### Methyl 2-acetoxy-3-(2,3-diphenyl-1*H*-indol-7-yl)-2-methylpropanoate (3j)

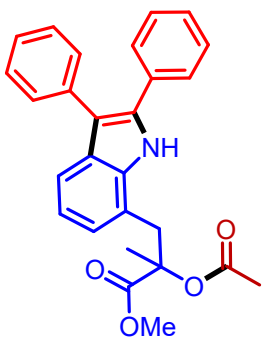

The title compound was prepared according to the general procedure. The product was obtained as a white solid. Yield: 75% (320 mg); mp 73-75 °C. <sup>1</sup>H NMR (600 MHz, CDCl<sub>3</sub>) δ 8.79 (1H, s), 7.59 (1H, d, *J* = 7.9 Hz), 7.47 (2H, d, *J* = 7.0 Hz), 7.45 – 7.43 (2H, m), 7.38 (2H, t, *J* = 7.6 Hz), 7.34 – 7.31 (2H, m), 7.31 – 7.26 (2H, m), 7.10 – 7.07 (1H, m), 7.01 (1H, d, *J* = 7.2 Hz), 3.68 (3H, s), 3.58 (1H, d, *J* = 14.5 Hz), 3.39 (1H, d, *J* = 14.5 Hz), 1.98 (3H, s), 1.63 (3H, s); <sup>13</sup>C NMR (150 MHz, CDCl<sub>3</sub>) δ 173.2, 170.1, 135.8, 135.1, 133.8, 132.5, 130.1, 129.1, 128.7, 128.5, 127.8, 127.6, 126.2, 125.5, 120.2, 119.0, 117.6, 115.1, 81.5, 52.6, 40.5, 21.4, 21.3; IR (ATR) 3330, 2995, 1758, 1245, 697 cm<sup>-1</sup>; HRMS (EI) *m/z*: [M+H] Calcd for C<sub>27</sub>H<sub>26</sub>NO<sub>4</sub> 428.1856; Found 428.1854.

### 1-(5-Methyl-2,3-diphenyl-1*H*-indol-7-yl)-3-phenoxypropan-2-yl acetate (3l)

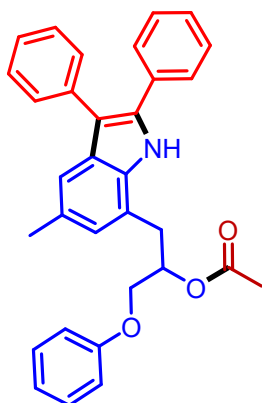

The title compound was prepared according to the general procedure. The product was obtained as a white solid. Yield: 78% (371 mg); mp 150-152 °C. <sup>1</sup>H NMR (600 MHz, CDCl<sub>3</sub>) δ 9.80 (1H, s), 7.42 – 7.35 (4H, m), 7.32 – 7.29 (2H, m), 7.26 (1H, s), 7.23 – 7.29 (3H, m), 7.18 – 7.15 (3H, m), 6.89 – 6.86 (1H, m), 6.81 (2H, d, *J* = 5.5 Hz), 6.74 (1H, s), 5.31 – 5.28 (1H, m), 4.09 – 4.06 (1H, m), 4.03 – 4.00 (1H, m), 3.32 (1H, d, *J* = 13.8 Hz), 3.10 (1H, t, *J* = 13.9 Hz), 2.30 (3H, s), 2.13 (3H, s); <sup>13</sup>C NMR (150 MHz, CDCl<sub>3</sub>) δ 172.3, 158.3, 135.6, 134.4, 133.6, 132.7, 130.2, 129.6, 129.5, 129.2, 128.5, 128.4, 127.9, 127.3, 126.1, 125.1, 121.2, 118.6, 118.3, 114.6, 114.5, 73.5, 67.2, 33.6, 21.4; IR (ATR) 3328, 2996, 1769, 1242, 691 cm<sup>-1</sup>; HRMS (EI) *m/z*: [M+H] Calcd for C<sub>32</sub>H<sub>30</sub>NO<sub>3</sub> 476.2220; Found 476.2219.

### 1-(5-Methoxy-2,3-diphenyl-1*H*-indol-7-yl)-3-phenoxypropan-2-yl acetate (3m)

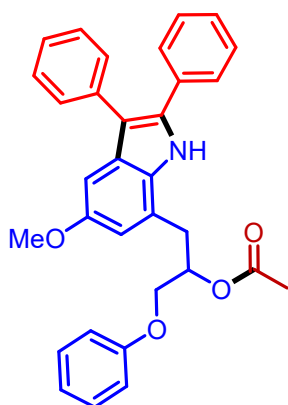

The title compound was prepared according to the general procedure. The product was obtained as a black solid. Yield: 77% (379 mg); mp 142-144 °C. <sup>1</sup>H NMR (600 MHz, CDCl<sub>3</sub>) δ 9.78 (1H, s), 7.38 (4H, t, *J* = 9.5 Hz), 7.33 – 7.28 (2H, m), 7.28 – 7.20 (3H, m), 7.18 (3H, t, *J* = 7.6 Hz), 6.92 (1H, s), 6.89 – 6.84 (1H, m), 6.79 (2H, d, *J* = 8.4 Hz), 6.60 (1H, s), 5.33 – 5.25 (1H, m), 4.11 – 3.98 (2H, m), 3.69 (3H, s), 3.32 (1H, d, *J* = 13.7 Hz), 3.08 (1H, t, *J* = 12.3 Hz), 2.13 (3H, s); <sup>13</sup>C NMR (150 MHz, CDCl<sub>3</sub>) δ 172.3, 158.3, 154.6, 135.5, 135.0, 132.6, 132.2, 130.5, 130.1, 129.5, 129.2, 128.5, 127.8, 127.3, 126.1, 121.2, 119.9, 114.8, 114.6, 113.9, 99.9, 73.4, 67.1, 55.8, 33.5, 21.3; IR (ATR) 3330, 2994, 1769, 1244, 691 cm<sup>-1</sup>; HRMS (EI) *m/z*: [M+H] Calcd for C<sub>32</sub>H<sub>30</sub>NO<sub>4</sub> 492.2169; Found 492.2165.

### 1-(5-Fluoro-2,3-diphenyl-1*H*-indol-7-yl)-3-phenoxypropan-2-yl acetate (3n)

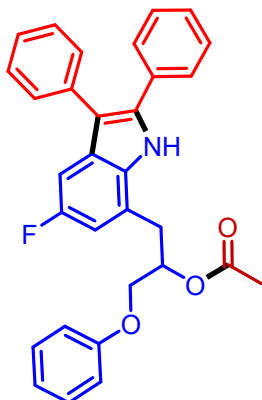

The title compound was prepared according to the general procedure. The product was obtained as a yellow solid. Yield: 72% (308 mg); mp 148-150 °C. <sup>1</sup>H NMR (600 MHz, CDCl<sub>3</sub>) δ 9.96 (1H, s), 7.46 (2H, d, *J* = 8.5 Hz), 7.41 – 7.36 (4H, m), 7.32 – 7.25 (6H, m), 7.20 (1H, d, *J* = 9.7 Hz), 6.95 (1H, t, *J* = 7.4 Hz), 6.87 (2H, d, *J* = 8.1 Hz), 6.76 (1H, d, *J* = 9.4 Hz), 5.38 – 5.32 (1H, m), 4.14 (1H, dd, *J* = 10.5, 5.7 Hz), 4.08 (1H, dd, *J* = 10.7, 2.7 Hz), 3.40 (1H, d, *J* = 13.9 Hz), 3.19 (1H, dd, *J* = 13.9, 10.6 Hz), 2.21 (3H, s); <sup>13</sup>C NMR (150 MHz, CDCl<sub>3</sub>) δ 172.4, 158.2, 158.1 (d, *J* = 234 Hz), 135.9, 135.3, 134.9, 132.3, 131.8, 130.0, 129.5, 129.3, 128.6, 128.6, 128.3, 127.9, 127.7, 126.4, 121.4, 120.0 (d, *J* = 9 Hz), 114.7, 111.6 (d, *J* = 26 Hz), 103.5 (d, *J* = 23 Hz), 73.2, 67.1, 33.4, 21.3; IR (ATR) 3382, 1712, 1458, 1237, 693 cm<sup>-1</sup>; HRMS (EI) *m/z*: [M+H] Calcd for C<sub>31</sub>H<sub>27</sub>FNO<sub>3</sub> 428.1856; Found 428.1854.

### 1-(5-Bromo-2,3-diphenyl-1*H*-indol-7-yl)-3-phenoxypropan-2-yl acetate (3o)

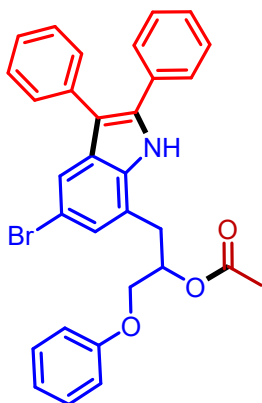

The title compound was prepared according to the general procedure. The product was obtained as a white solid. Yield: 73% (395 mg); mp 118-120 °C. <sup>1</sup>H NMR (600 MHz, CDCl<sub>3</sub>) δ 10.03 (1H, s), 7.59 (1H, s), 7.40 (2H, d, *J* = 8.4 Hz), 7.32-7.30 (4H, m), 7.24 (3H, t, *J* = 7.2 Hz), 7.21 – 7.17 (3H, m), 7.02 (1H, s), 6.89 (1H, t, *J* = 7.2 Hz), 6.81 (2H, d, *J* = 8.4 Hz), 5.28-5.25 (1H, m), 4.08 (1H, dd, *J* = 10.8, 6.0 Hz), 4.02 (1H, dd, *J* = 10.2, 2.4 Hz), 3.32 (1H, d, *J* = 13.8 Hz), 3.10 (1H, dd, *J* = 15.0, 11.4 Hz), 2.15 (3H, s); <sup>13</sup>C NMR (150 MHz, CDCl<sub>3</sub>) δ 172.5, 158.2, 135.4, 134.7, 134.0, 132.0, 130.6, 130.1, 129.5, 128.6, 127.9, 127.8, 126.5, 125.8, 121.4, 121.2, 120.7, 114.6, 114.6, 114.6, 113.2, 73.2, 67.2, 33.4, 21.3; IR (ATR) 3307, 2923, 1769, 1239, 694 cm<sup>-1</sup>; HRMS (EI) *m/z*: [M+H] Calcd for C<sub>31</sub>H<sub>27</sub>BrNO<sub>3</sub> 540.1168; Found 540.1165.



### 1-(2,3-Di-*p*-tolyl-1*H*-indol-7-yl)-3-phenoxypropan-2-yl acetate (4b)

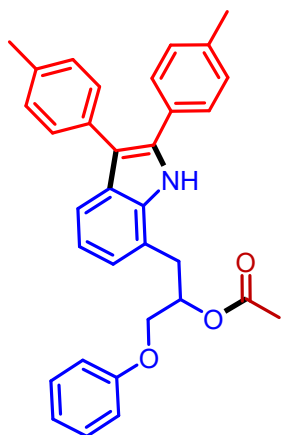

The title compound was prepared according to the general procedure. The product was obtained as a black solid. Yield: 74% (361 mg); mp 130-132 °C. <sup>1</sup>H NMR (600 MHz, CDCl<sub>3</sub>) δ 9.97 (1H, s), 7.58 (1H, d, *J* = 7.9 Hz), 7.44 (2H, d, *J* = 8.2 Hz), 7.38 (2H, d, *J* = 8.0 Hz), 7.27 (2H, dd, *J* = 8.8, 7.3 Hz), 7.22 (2H, d, *J* = 7.8 Hz), 7.15 (2H, d, *J* = 7.9 Hz), 7.04 (1H, t, *J* = 7.5 Hz), 6.99 – 6.95 (2H, m), 6.89 (2H, d, *J* = 7.5 Hz), 5.40 – 5.38 (1H, m), 4.16 (1H, dd, *J* = 10.6, 5.7 Hz), 4.10 (1H, dd, *J* = 10.6, 2.5 Hz), 3.44 (1H, dd, *J* = 13.9, 2.5 Hz), 3.23 (1H, dd, *J* = 13.8, 10.7 Hz), 2.42 (3H, s), 2.37 (3H, s), 2.23 (3H, s); <sup>13</sup>C NMR (150 MHz, CDCl<sub>3</sub>) δ 172.4, 158.3, 137.1, 135.6, 135.1, 134.3, 132.4, 130.0, 129.8, 129.4, 129.3, 129.2, 129.0, 127.8, 123.1, 121.2, 120.1, 118.7, 118.7, 114.6, 114.4, 73.5, 67.1, 33.5, 21.4, 21.2; IR (ATR) 3334, 2995, 1769, 1241, 750 cm<sup>-1</sup>; HRMS (EI) *m/z*: [M+H] Calcd for C<sub>33</sub>H<sub>32</sub>NO<sub>3</sub> 490.2376; Found 490.2376.

### 1-(2,3-bis(4-Methoxyphenyl)-1*H*-indol-7-yl)-3-(2,4-dibromophenoxy)propan-2-yl acetate (4c)

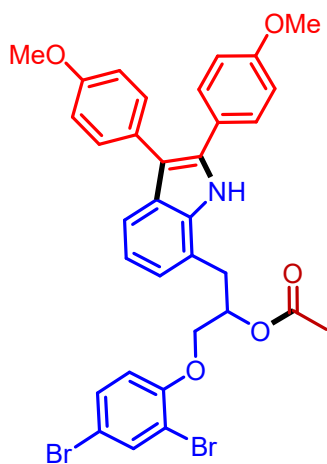

The title compound was prepared according to the general procedure. The product was obtained as a white solid. Yield: 75% (509 mg); mp 86-88 °C. <sup>1</sup>H NMR (600 MHz, CDCl<sub>3</sub>) δ 9.66 (1H, s), 7.63 (1H, d, *J* = 2.3 Hz), 7.52 (1H, d, *J* = 7.8 Hz), 7.41 (2H, d, *J* = 8.2 Hz), 7.35 (2H, d, *J* = 8.0 Hz), 7.28 (1H, dd, *J* = 8.7, 2.3 Hz), 7.02 (1H, t, *J* = 7.5 Hz), 6.98 – 6.91 (3H, m), 6.86 (2H, d, *J* = 8.4 Hz), 6.63 (1H, d, *J* = 8.7 Hz), 5.39 – 5.34 (1H, m), 4.13 (1H, dd, *J* = 10.6, 2.6 Hz), 4.07 (1H, dd, *J* = 10.6, 5.3 Hz), 3.84 (3H, s), 3.82 (3H, s), 3.41 (1H, dd, *J* = 13.8, 2.9 Hz), 3.32 (1H, dd, *J* = 13.8, 10.4 Hz), 2.20 (3H, s); <sup>13</sup>C NMR (150 MHz, CDCl<sub>3</sub>) δ 172.1, 159.0, 158.0, 154.0, 135.5, 135.0, 134.0, 131.2, 129.1, 127.7, 125.1, 123.0, 120.1, 118.6, 118.4, 114.5, 114.0, 113.9, 113.6, 113.2, 73.0, 68.3, 55.2, 33.0, 31.5, 21.3; IR (ATR) 3348, 1717, 1452, 1235, 1029, 832 cm<sup>-1</sup>; HRMS (EI) *m/z*: [M+H] Calcd for C<sub>33</sub>H<sub>30</sub>Br<sup>79</sup>Br<sup>81</sup>NO<sub>5</sub> 680.0464; Found 680.0457.

### 2-(2,3-Bis(4-butylphenyl)-1*H*-indol-7-yl)ethyl acetate (4d)

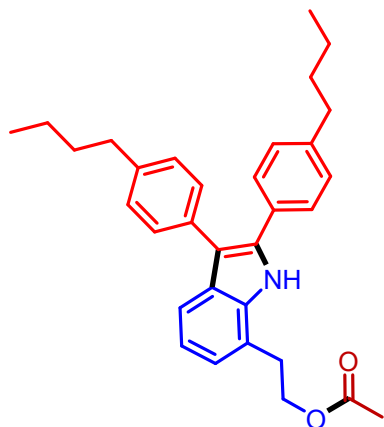

The title compound was prepared according to the general procedure. The product was obtained as a viscous liquid. Yield: 79% (370 mg);  $^1\text{H NMR}$  (600 MHz,  $\text{CDCl}_3$ )  $\delta$  9.39 (1H, s), 7.56 (1H, d,  $J = 7.8$  Hz), 7.45 (2H, d,  $J = 8.2$  Hz), 7.37 (2H, d,  $J = 8.0$  Hz), 7.20 (2H, d,  $J = 7.9$  Hz), 7.15 (2H, d,  $J = 8.1$  Hz), 7.05 (1H, t,  $J = 7.5$  Hz), 7.01 (1H, d,  $J = 7.0$  Hz), 4.46 – 4.40 (2H, m), 3.23 (2H, t,  $J = 7.7$  Hz), 2.69 – 2.64 (2H, m), 2.61 (2H, t,  $J = 7.8$  Hz), 2.13 (3H, s), 1.70 – 1.64 (2H, m), 1.63 – 1.62 (2H, m), 1.45 – 1.35 (4H, m), 0.97 (3H, t,  $J = 7.4$  Hz), 0.94 (3H, t,  $J = 7.4$  Hz);  $^{13}\text{C NMR}$  (150 MHz,  $\text{CDCl}_3$ )  $\delta$  172.1, 142.2, 140.6, 135.1, 134.1, 132.5, 130.1, 130.0, 129.1, 128.6, 128.4, 127.7, 122.6, 120.1, 119.4, 118.6, 114.7, 64.3, 35.4, 35.4, 33.5, 33.4, 31.8, 22.5, 22.4, 21.1, 14.0, 13.9; IR (ATR) 3353, 2927, 1719, 1453, 1236, 745  $\text{cm}^{-1}$ ; HRMS (EI)  $m/z$ :  $[\text{M}+\text{H}]$  Calcd for  $\text{C}_{32}\text{H}_{38}\text{NO}_2$  468.2897; Found 468.2896.

**1-(2,3-Bis(4-bromophenyl)-1H-indol-7-yl)-3-(4-(tert-butyl)phenoxy)propan-2-yl acetate (4e)**

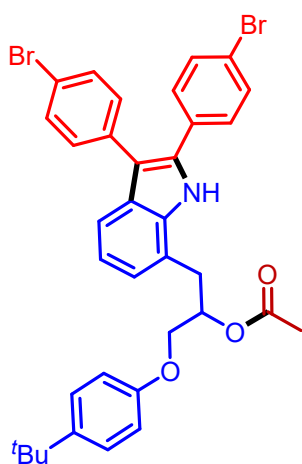

The title compound was prepared according to the general procedure. The product was obtained as a white solid. Yield: 72% (487 mg); mp 113-115 °C.  $^1\text{H NMR}$  (600 MHz,  $\text{CDCl}_3$ )  $\delta$  10.13 (1H, s), 7.51 (3H, d,  $J = 8.4$  Hz), 7.45 (2H, d,  $J = 8.5$  Hz), 7.34 (2H, d,  $J = 8.5$  Hz), 7.29 (2H, d,  $J = 8.4$  Hz), 7.26 (2H, d,  $J = 8.7$  Hz), 7.06 – 7.02 (1H, m), 7.00 (1H, d,  $J = 7.1$  Hz), 6.79 (2H, d,  $J = 8.8$  Hz), 5.31 – 5.29 (1H, m), 4.12 (1H, dd,  $J = 10.6, 5.7$  Hz), 4.05 (1H, dd,  $J = 10.6, 2.4$  Hz), 3.39 (1H, dd,  $J = 13.7, 2.3$  Hz), 3.23 (1H, dd,  $J = 13.8, 10.8$  Hz), 2.22 (3H, s), 1.28 (9H, s);  $^{13}\text{C NMR}$  (150 MHz,  $\text{CDCl}_3$ )  $\delta$  172.6, 156.0, 144.1, 135.4, 134.1, 133.3, 131.9, 131.8, 131.7, 131.2, 129.4, 128.5, 126.3, 123.8, 121.8, 120.6, 120.3, 119.1, 118.5, 114.1, 114.0, 73.6, 67.2, 34.0, 33.5, 31.4, 21.4; IR (ATR) 3279, 2953, 1769, 1239, 827  $\text{cm}^{-1}$ ; HRMS (EI)  $m/z$ :  $[\text{M}+\text{H}]$  Calcd for  $\text{C}_{35}\text{H}_{34}\text{Br}^{79}\text{Br}^{81}\text{NO}_3$  676.0879; Found 676.0875.

**1-(2,3-Bis(3-bromophenyl)-1H-indol-7-yl)-3-(tert-butoxy)propan-2-yl acetate (4f)**

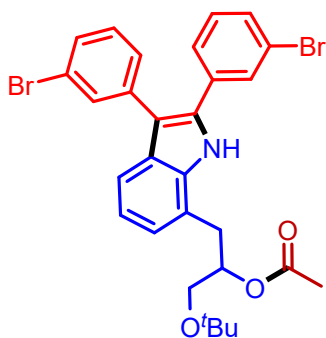

The title compound was prepared according to the general procedure. The product was obtained as a white solid. Yield: 71% (425 mg); mp 65-67 °C.  $^1\text{H}$  NMR (600 MHz,  $\text{CDCl}_3$ )  $\delta$  10.32 (1H, s), 7.74 (1H, t,  $J = 1.8$  Hz), 7.65 (1H, t,  $J = 1.8$  Hz), 7.55 (1H, d,  $J = 8.5$  Hz), 7.46 – 7.40 (3H, m), 7.35 – 7.31 (1H, m), 7.27 – 7.25 (1H, m), 7.20 (1H, t,  $J = 7.9$  Hz), 7.11 – 7.08 (1H, m), 7.04 (1H, d,  $J = 7.1$  Hz), 5.09 – 5.04 (1H, m), 3.50 (2H, dd,  $J = 4.3, 1.8$  Hz), 3.27 (1H, dd,  $J = 13.7, 2.8$  Hz), 3.20 (1H, dd,  $J = 13.7, 9.9$  Hz), 2.20 (3H, s), 1.17 (9H, s);  $^{13}\text{C}$  NMR (150 MHz,  $\text{CDCl}_3$ )  $\delta$  172.3, 137.3, 135.8, 134.4, 133.0, 132.7, 130.8, 130.6, 130.1, 130.1, 129.3, 128.8, 128.3, 126.9, 124.1, 122.7, 122.5, 120.6, 119.9, 118.3, 114.2, 74.4, 73.8, 61.1, 33.2, 27.4, 21.4; IR (ATR) 3311, 2972, 1769, 1244, 783  $\text{cm}^{-1}$ ; HRMS (EI)  $m/z$ :  $[\text{M}+\text{H}]$  Calcd for  $\text{C}_{29}\text{H}_{30}\text{Br}^{\text{79}}\text{Br}^{\text{81}}\text{NO}_3$  600.0566; Found 600.0568.

#### 1-(3-Methyl-2-phenyl-1H-indol-7-yl)-3-phenoxypropan-2-yl acetate (4h)

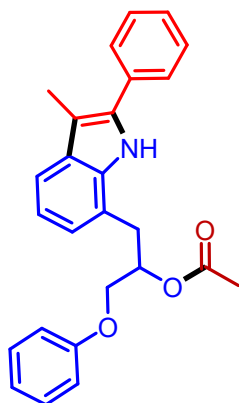

The title compound was prepared according to the general procedure. The product was obtained as a viscous liquid. Yield: 70% (280 mg);  $^1\text{H}$  NMR (600 MHz,  $\text{CDCl}_3$ )  $\delta$  9.60 (1H, s), 7.57 (2H, dd,  $J = 8.0, 1.8$  Hz), 7.44 (1H, d,  $J = 8.0$  Hz), 7.39 (2H, t,  $J = 7.7$  Hz), 7.26 (1H, t,  $J = 7.5$  Hz), 7.16 (2H, d,  $J = 8.1$  Hz), 6.96 (1H, t,  $J = 7.5$  Hz), 6.89 – 6.85 (2H, m), 6.78 (2H, d,  $J = 7.6$  Hz), 5.27 – 5.25 (1H, m), 4.03 (1H, dd,  $J = 10.5, 5.6$  Hz), 3.98 (1H, dd,  $J = 10.6, 2.5$  Hz), 3.31 (1H, d,  $J = 13.8$  Hz), 3.12 (1H, dd,  $J = 13.8, 10.6$  Hz), 2.42 (3H, s), 2.12 (3H, s);  $^{13}\text{C}$  NMR (150 MHz,  $\text{CDCl}_3$ )  $\delta$  172.2, 158.3, 135.1, 134.2, 133.3, 130.0, 129.4, 128.7, 127.5, 127.0, 123.0, 121.2, 119.4, 118.6, 118.1, 114.6, 108.5, 73.4, 67.1, 33.5, 21.4, 9.9; IR (ATR) 3330, 2929, 1729, 1455, 1227, 752, 691  $\text{cm}^{-1}$ ; HRMS (EI)  $m/z$ :  $[\text{M}+\text{H}]$  Calcd for  $\text{C}_{26}\text{H}_{26}\text{NO}_3$  400.1907; Found 400.1907.

#### (R)-1-(2,3-Diphenyl-1H-indol-7-yl)-3-phenoxypropan-2-yl acetate (7)

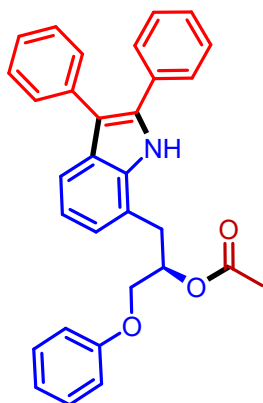

The title compound was prepared according to the general procedure. The product was obtained as a white solid. Yield: 86% (398 mg); mp 94-96 °C.  $^1\text{H}$  NMR (300 MHz,  $\text{CDCl}_3$ )  $\delta$  9.98 (1H, s), 7.49 (1H, d,  $J = 8.1$  Hz), 7.44-7.35 (4H, m), 7.29 (2H, t,  $J = 7.5$  Hz), 7.20-7.13 (6H, m), 6.94 (1H, dt,  $J = 7.8, 5.1$  Hz), 6.89-6.84 (2H, m), 6.78 (2H, dd,  $J = 8.4, 2.7$  Hz), 5.31-5.25 (1H, m), 4.10 – 3.92 (2H, m), 3.34 (1H, d,  $J = 13.8$  Hz), 3.19 – 3.07 (1H, m), 2.13 (3H, s);  $^{13}\text{C}$  NMR (75 MHz,  $\text{CDCl}_3$ )  $\delta$  172.4, 158.3, 135.3, 135.2, 134.3, 132.5, 130.2, 129.4, 128.9, 128.6, 128.5, 127.9, 127.4, 126.1, 123.4, 121.2, 120.2, 118.9, 118.8, 114.9, 114.5, 73.4, 67.0, 33.5, 21.4; IR (ATR) 3330, 2999, 1765, 1240, 744  $\text{cm}^{-1}$ ; HRMS (EI)  $m/z$ :  $[\text{M}+\text{H}]$  Calcd for  $\text{C}_{31}\text{H}_{28}\text{NO}_3$  462.2063; Found 462.2059.

**(S)-1-(2,3-Diphenyl-1H-indol-7-yl)-3-phenoxypropan-2-yl acetate (8)**

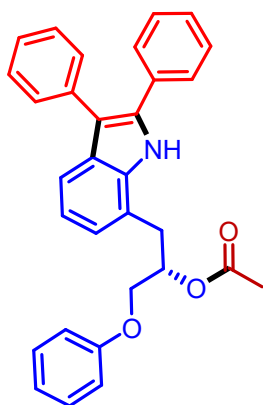

The title compound was prepared according to the general procedure. The product was obtained as a white solid. Yield: 85% (392 mg); mp 94-96 °C.  $^1\text{H}$  NMR (600 MHz,  $\text{CDCl}_3$ )  $\delta$  9.97 (1H, s), 7.49 (1H, d,  $J = 7.6$  Hz), 7.45 – 7.35 (4H, m), 7.33 – 7.27 (2H, m), 7.25 – 7.12 (6H, m), 7.00 – 6.85 (3H, m), 6.78 (2H, d,  $J = 8.0$  Hz), 5.35 – 5.20 (1H, m), 4.12 – 3.95 (2H, m), 3.35 (1H, d,  $J = 13.6$  Hz), 3.14 (1H, t,  $J = 12.2$  Hz), 2.13 (3H, s);  $^{13}\text{C}$  NMR (150 MHz,  $\text{CDCl}_3$ )  $\delta$  172.4, 158.3, 135.3, 135.2, 134.3, 132.6, 130.2, 129.5, 128.9, 128.6, 128.5, 127.9, 127.4, 126.1, 123.4, 121.2, 120.2, 118.9, 118.8, 114.9, 114.5, 73.5, 67.1, 33.5, 21.4; IR (ATR) 3333, 2996, 1769, 1242, 747  $\text{cm}^{-1}$ ; HRMS (EI)  $m/z$ :  $[\text{M}+\text{H}]$  Calcd for  $\text{C}_{31}\text{H}_{28}\text{NO}_3$  462.2063; Found 462.2060.

**$^1\text{H}$  NMR and  $^{13}\text{C}$  NMR spectra of synthesized compounds**

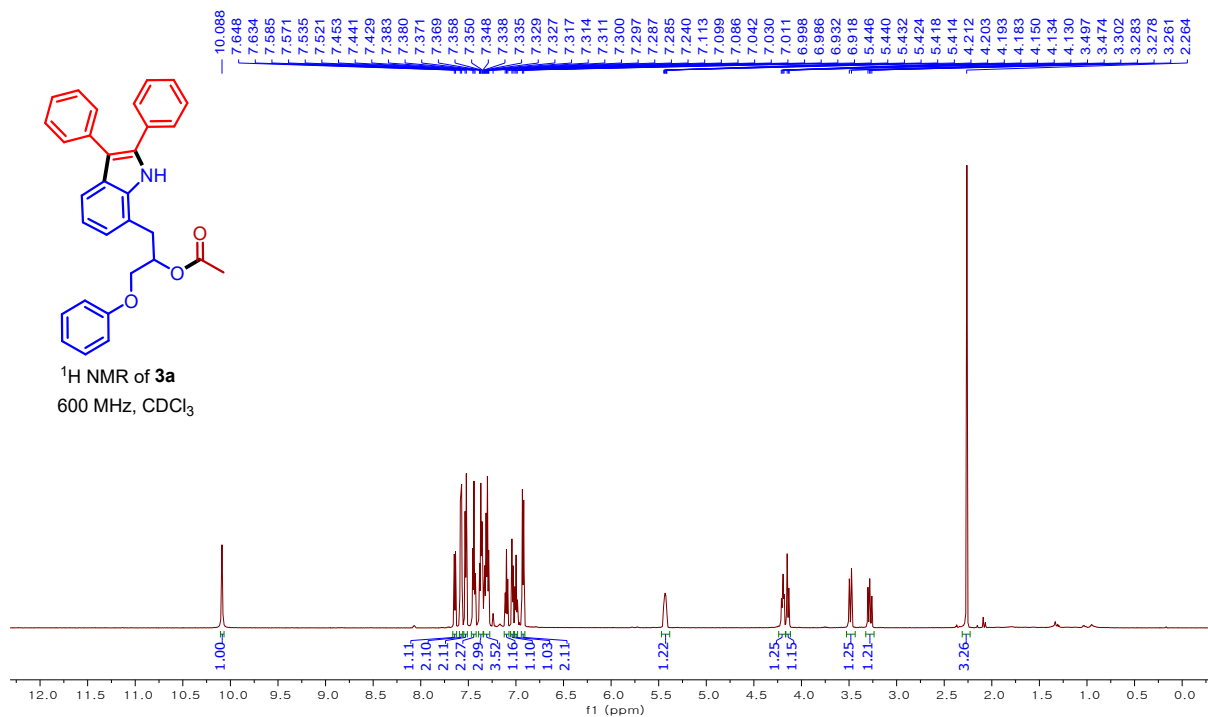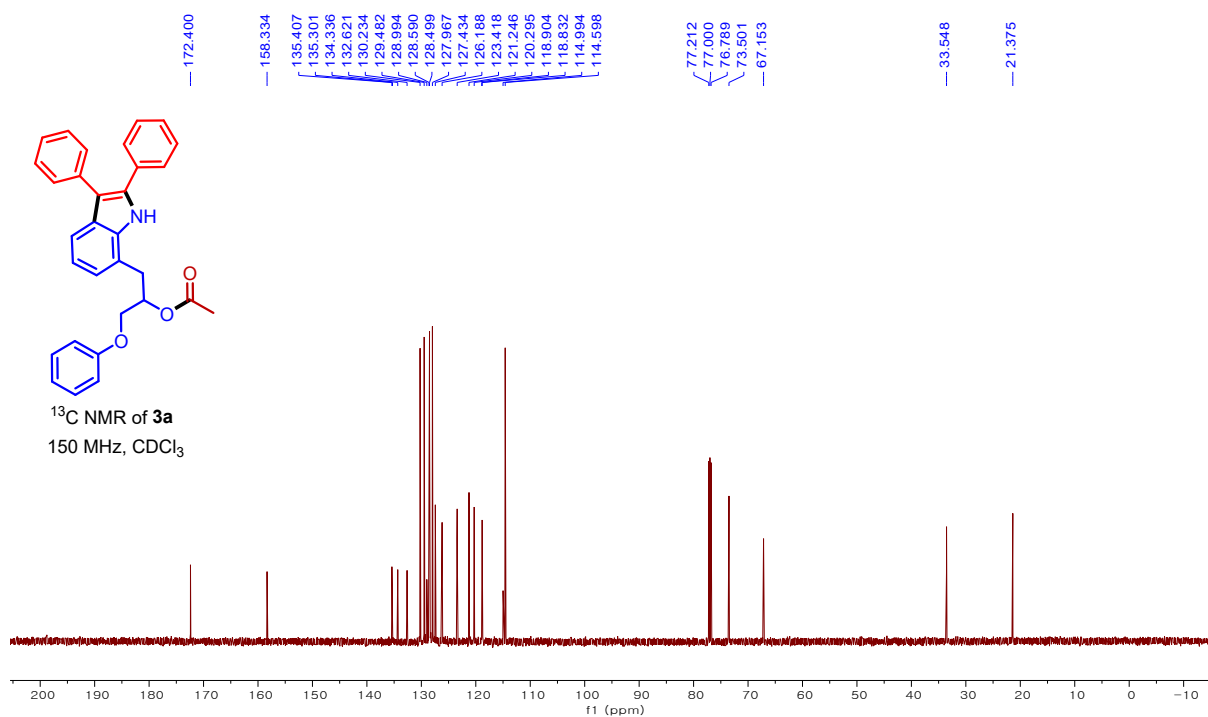



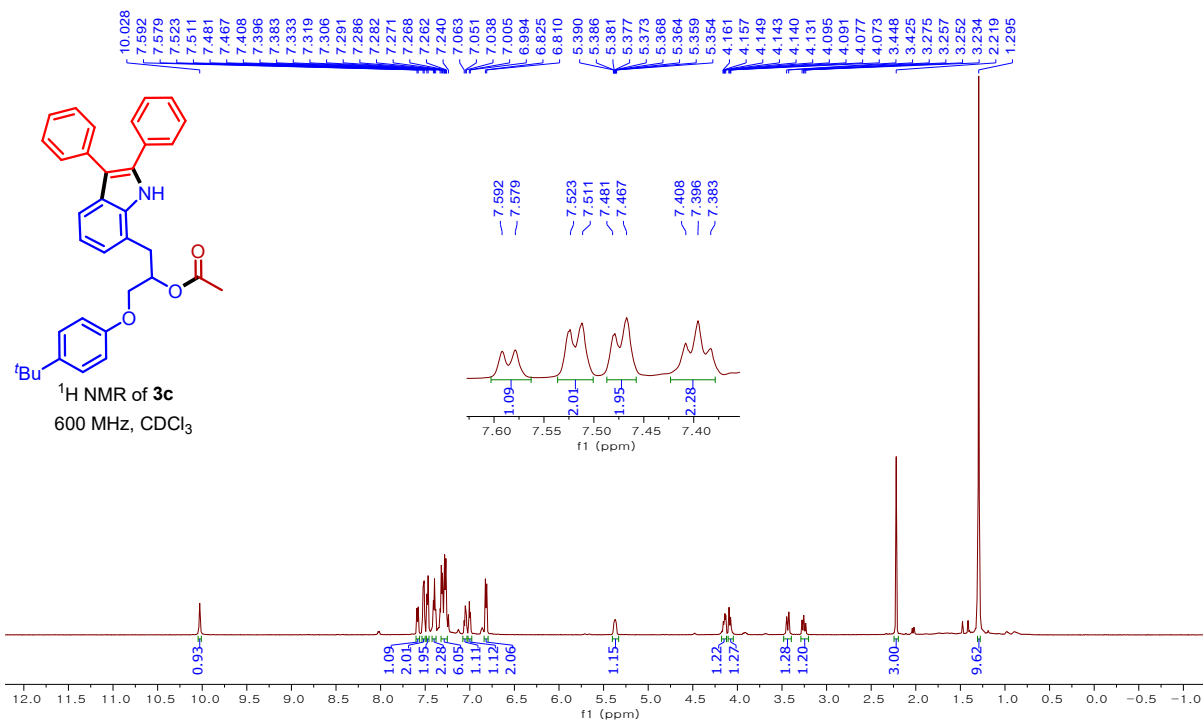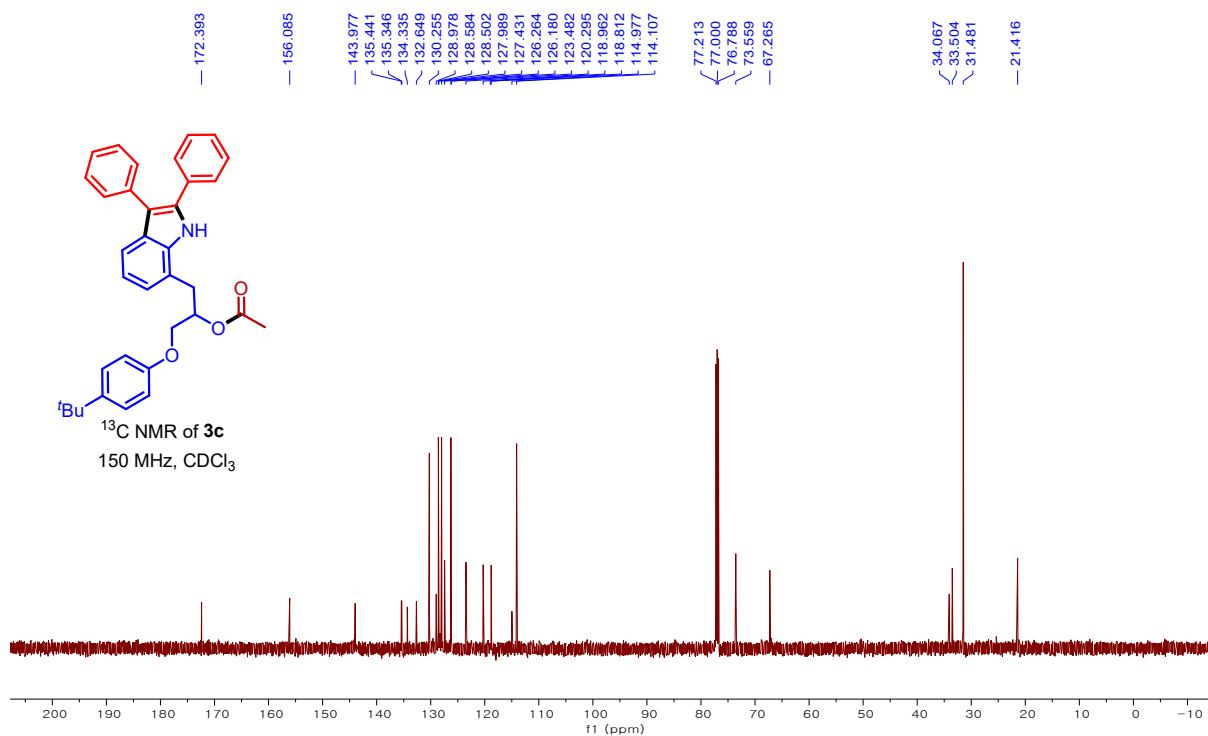

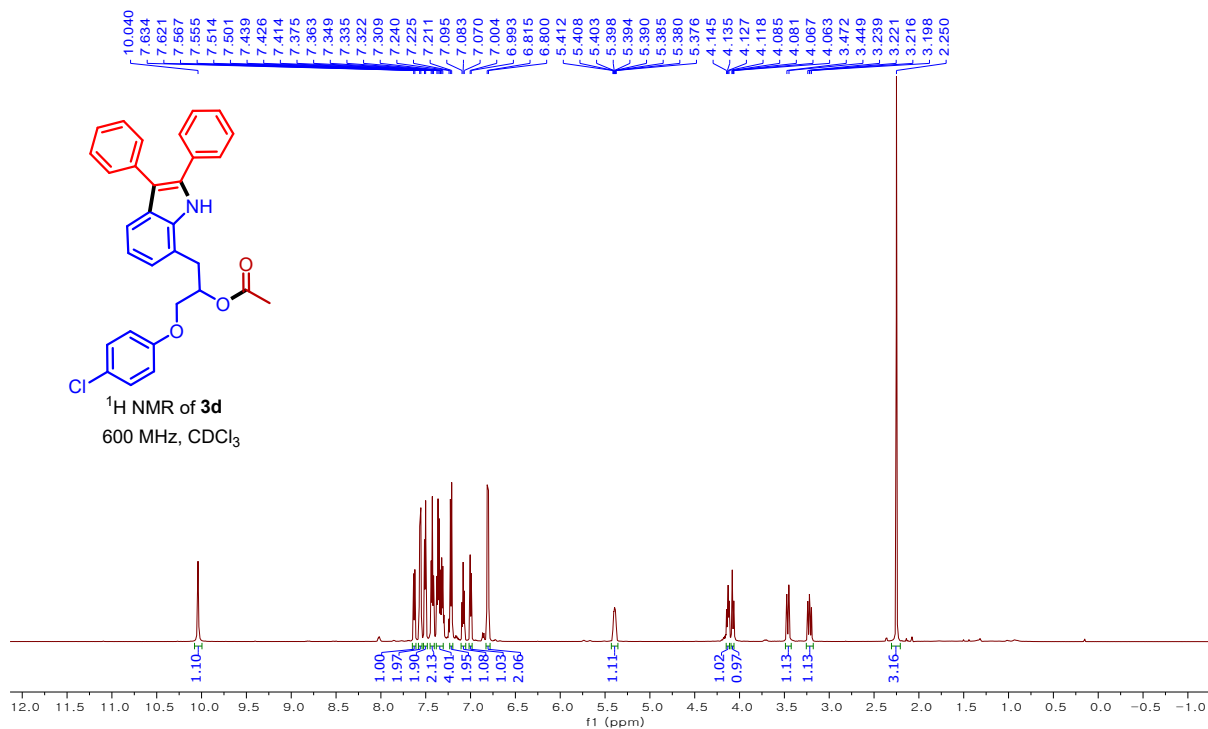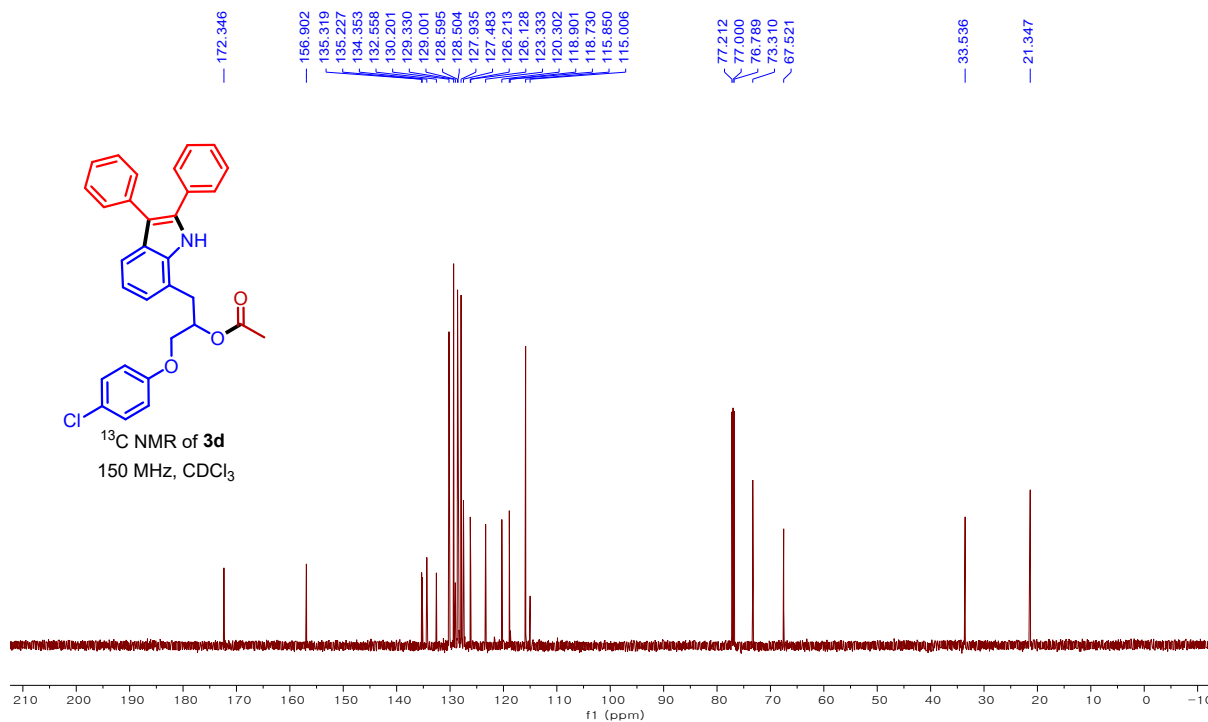



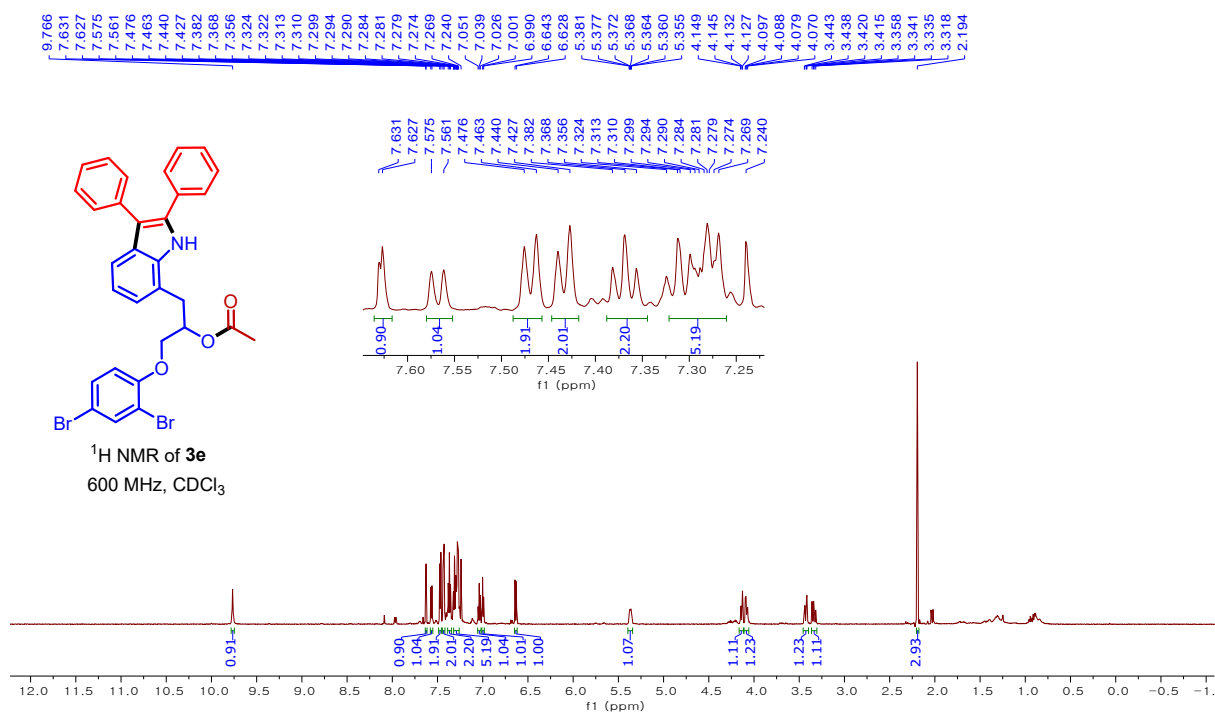

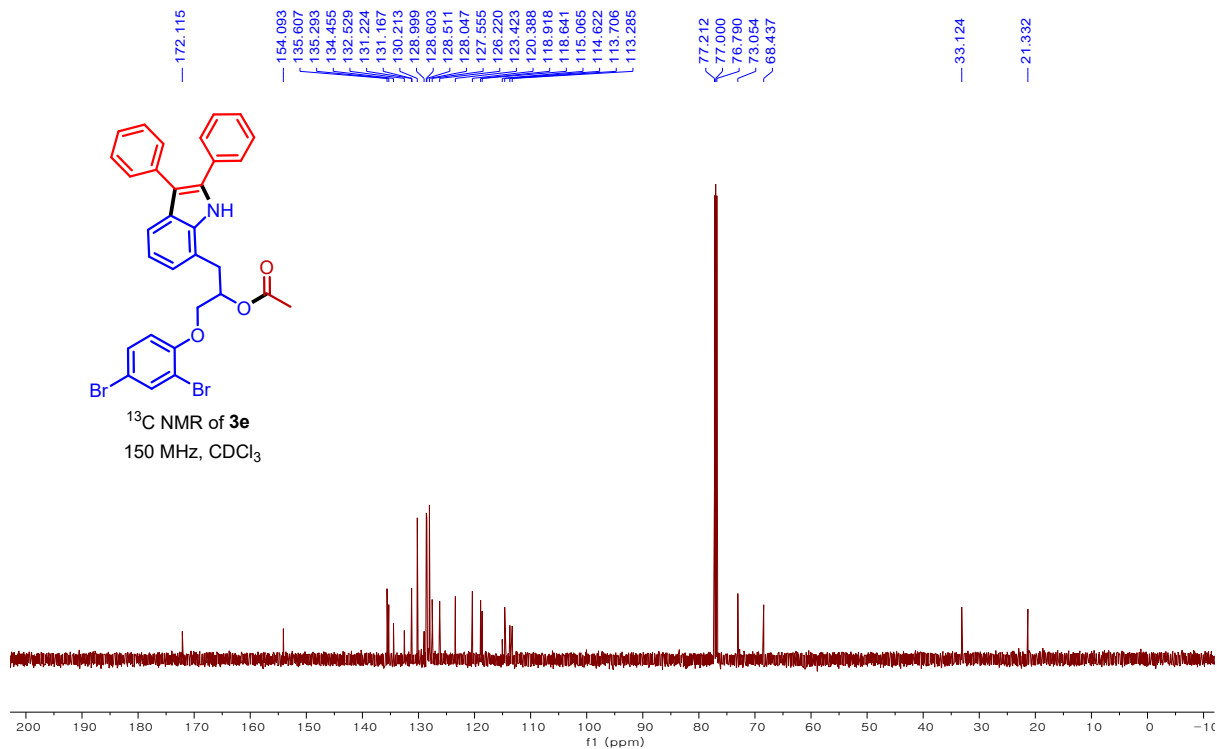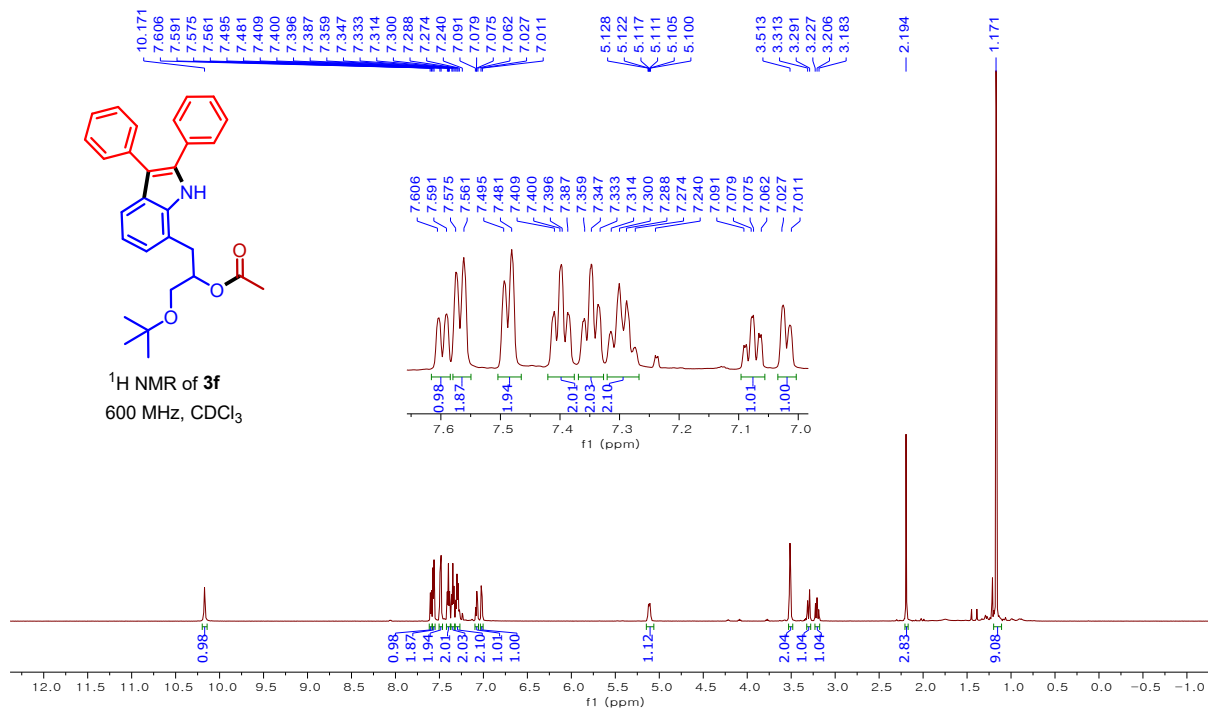

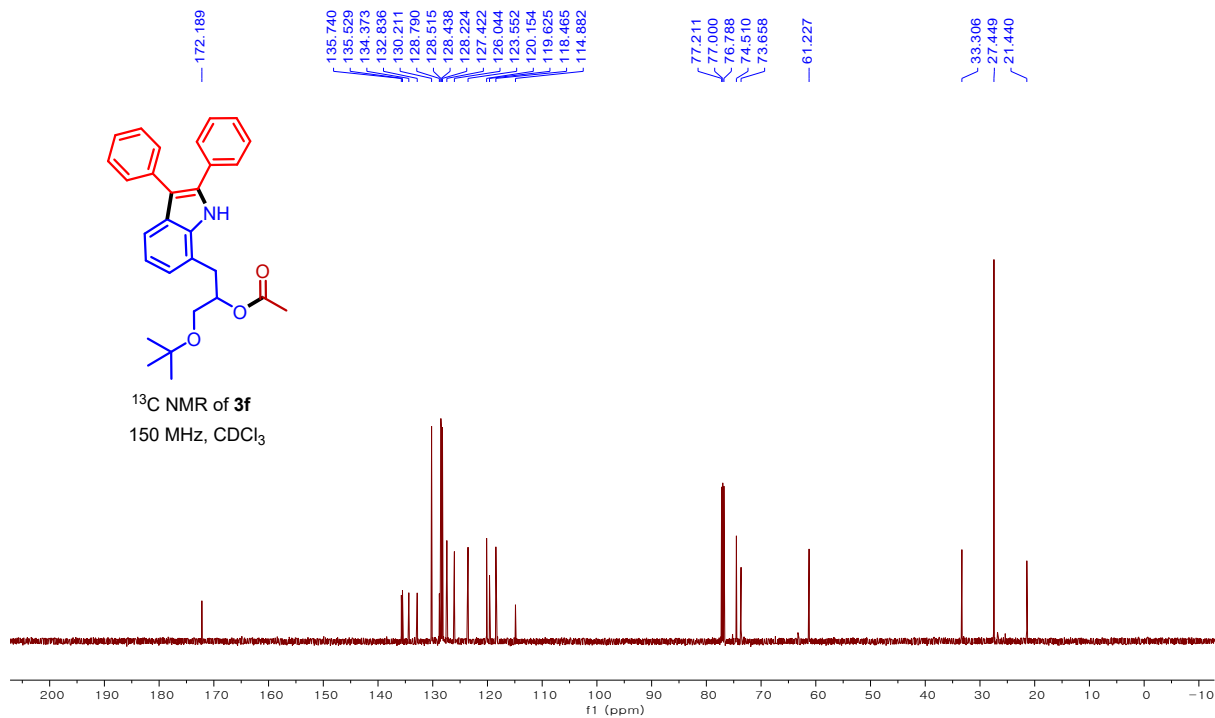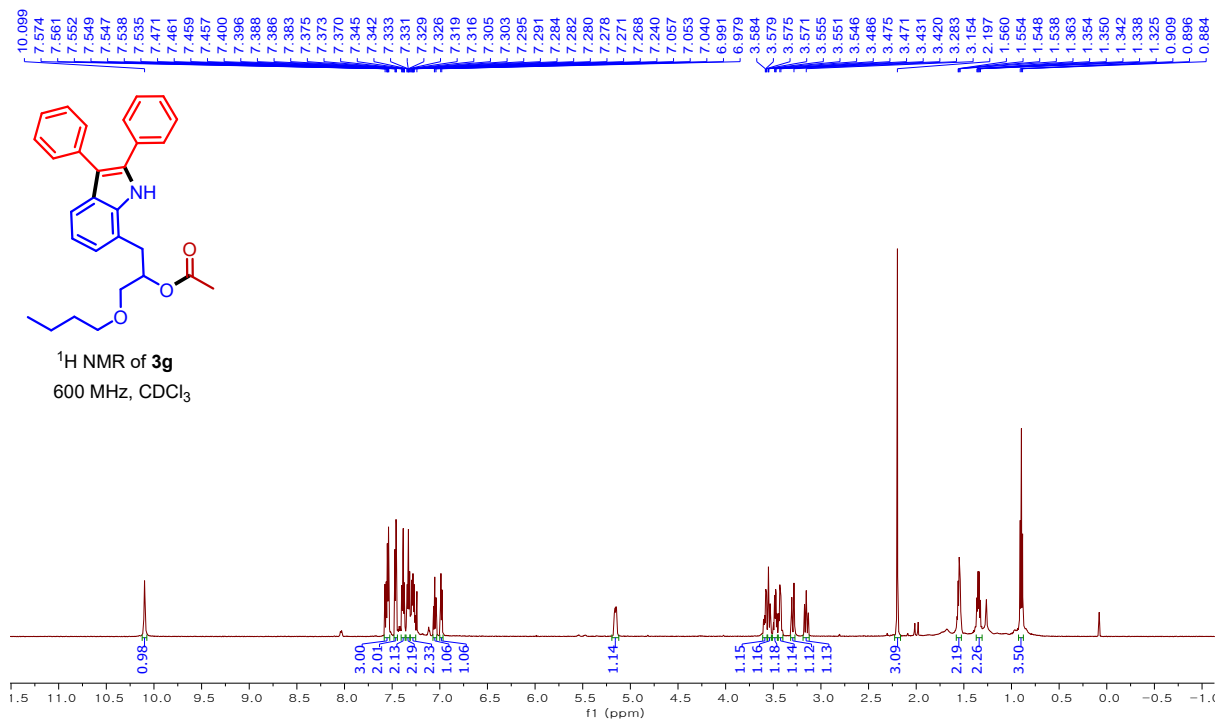

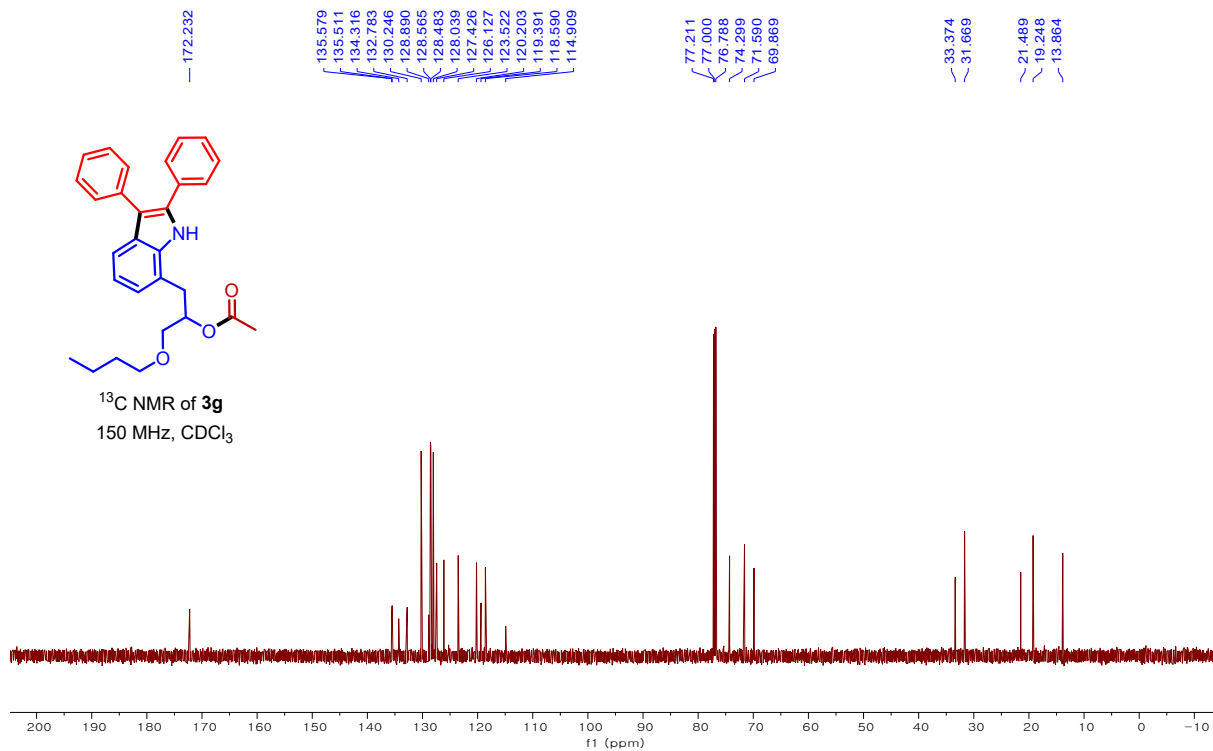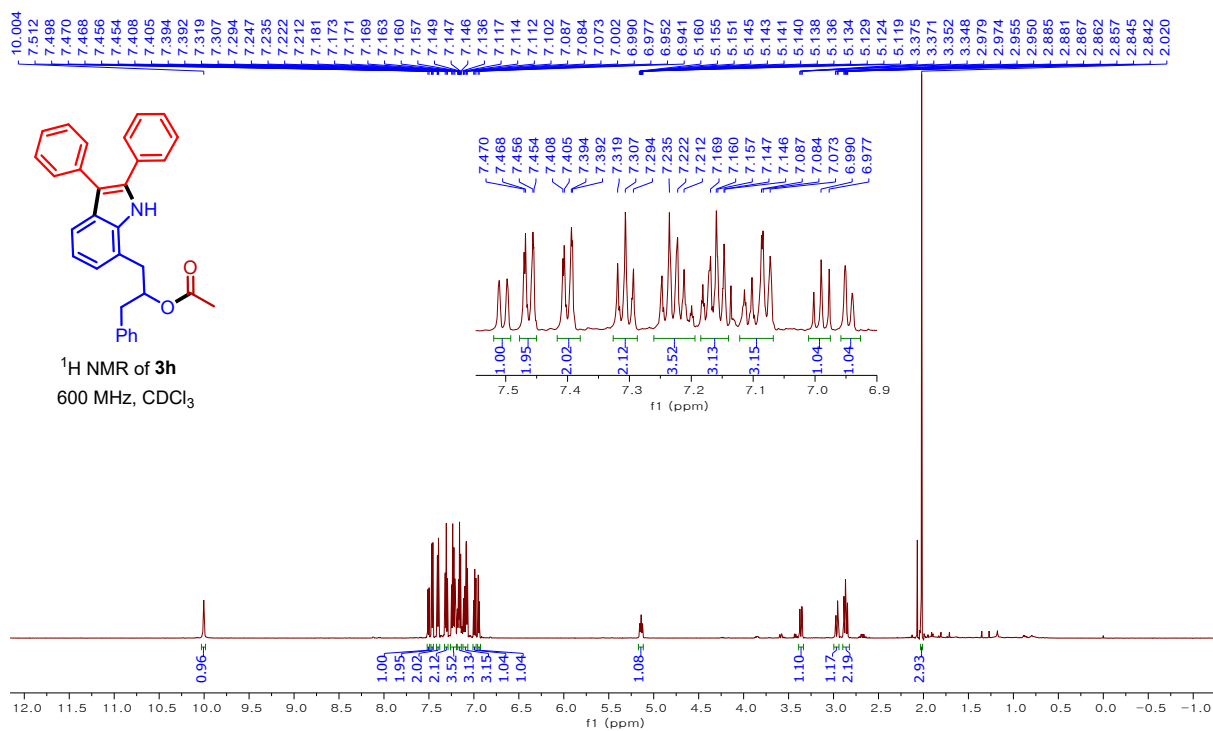

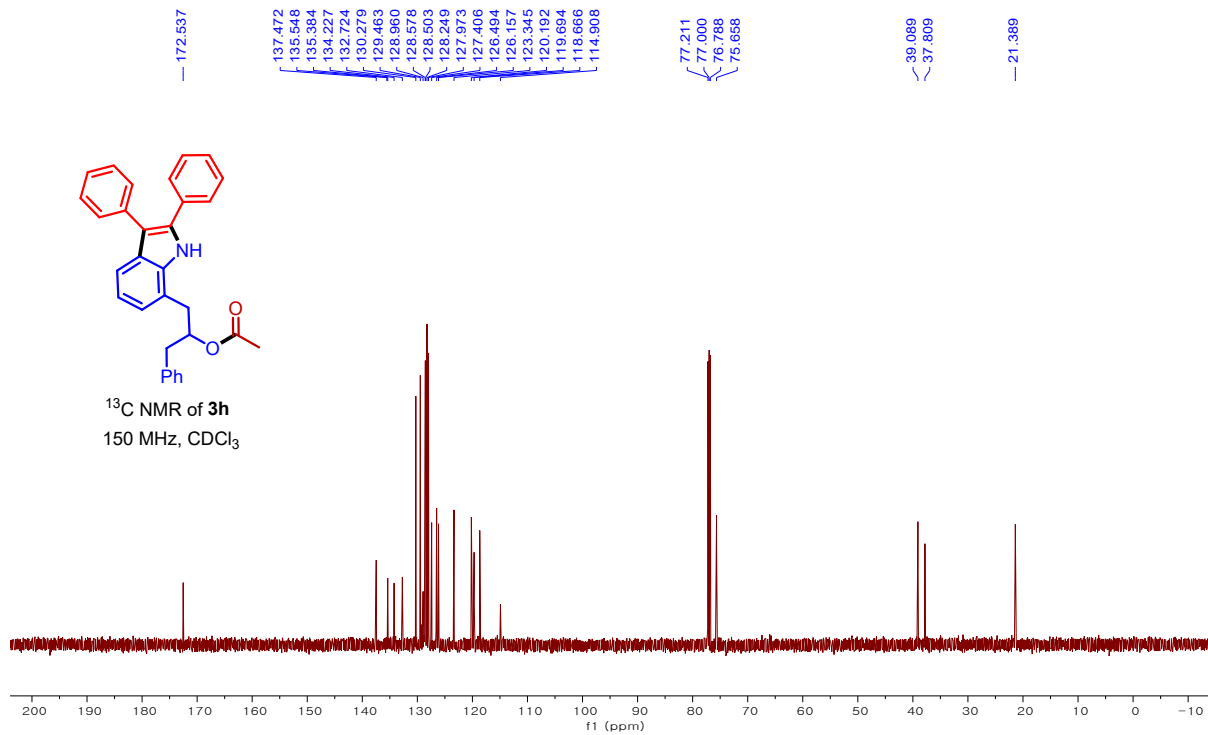

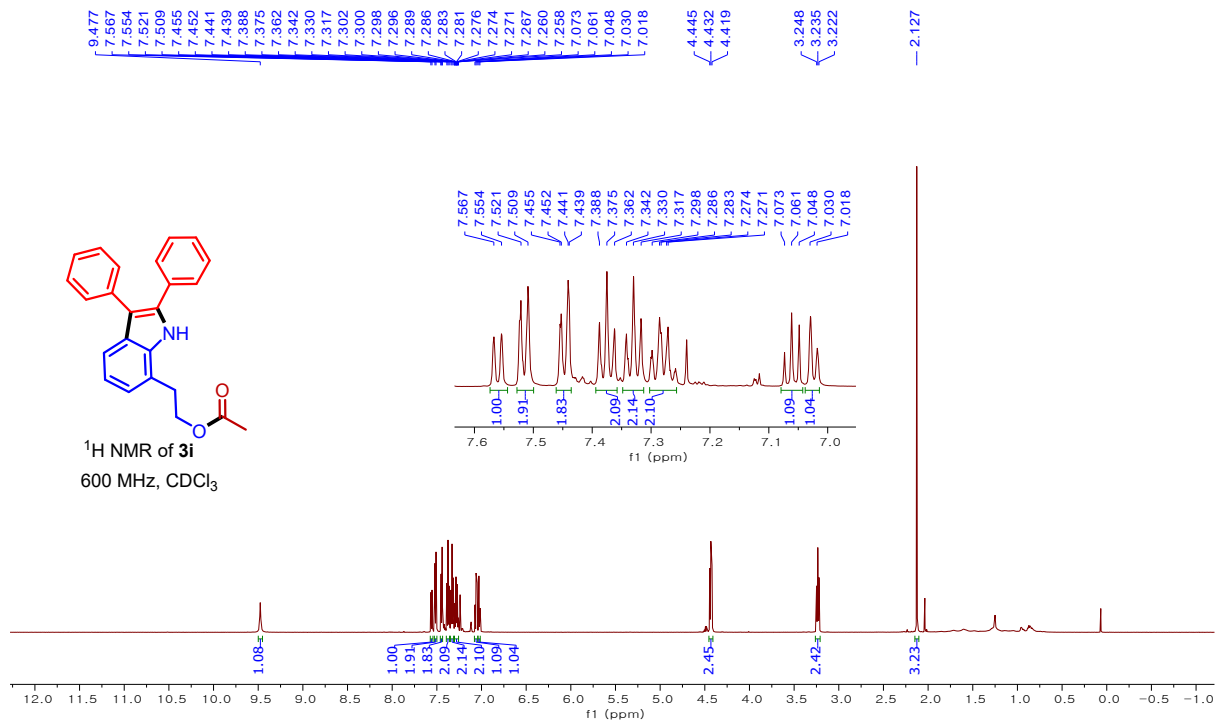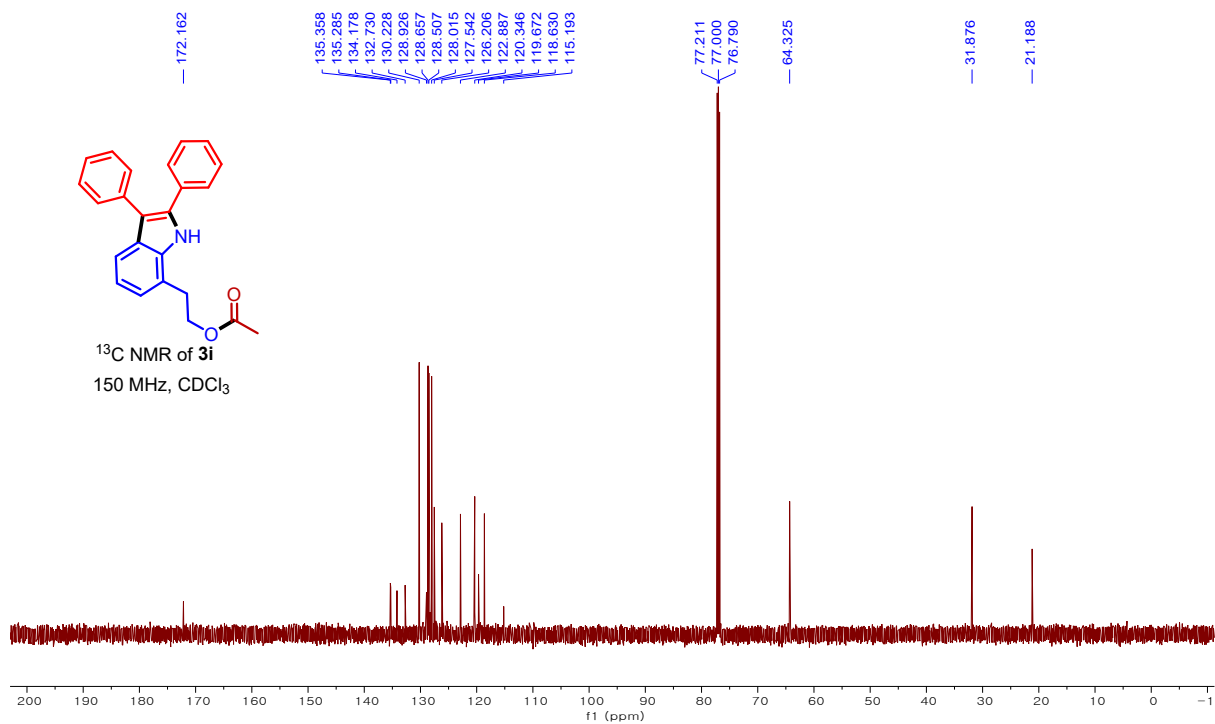

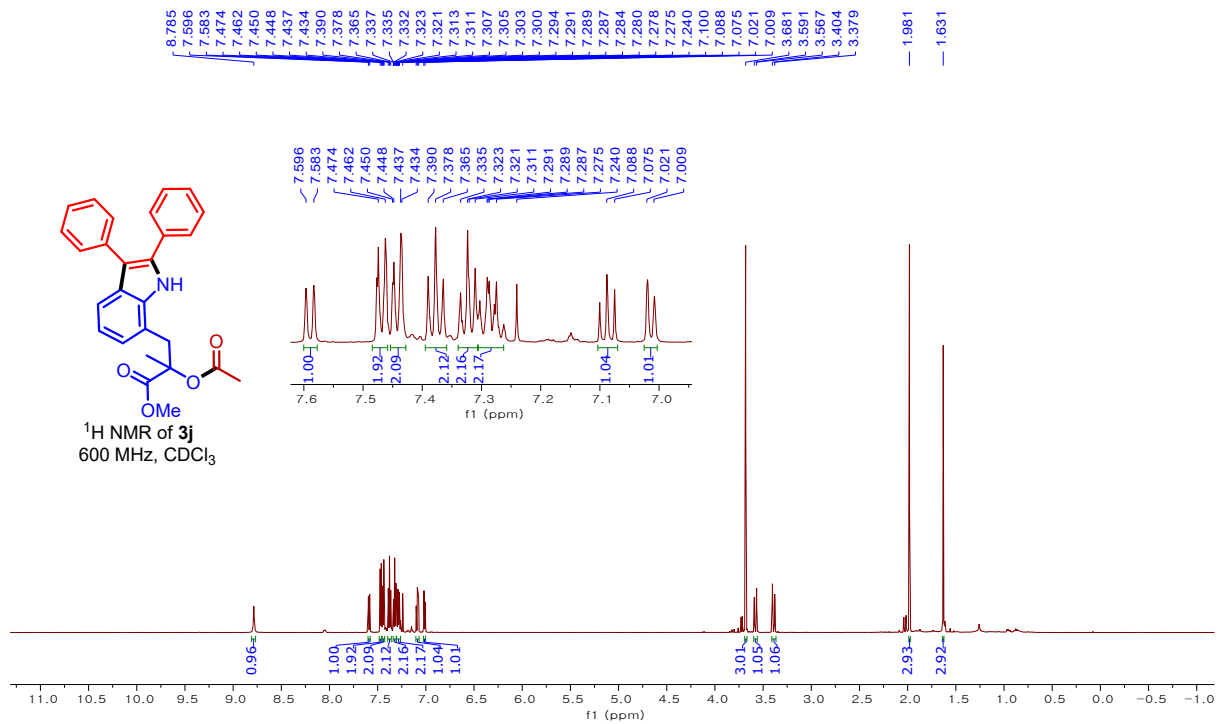

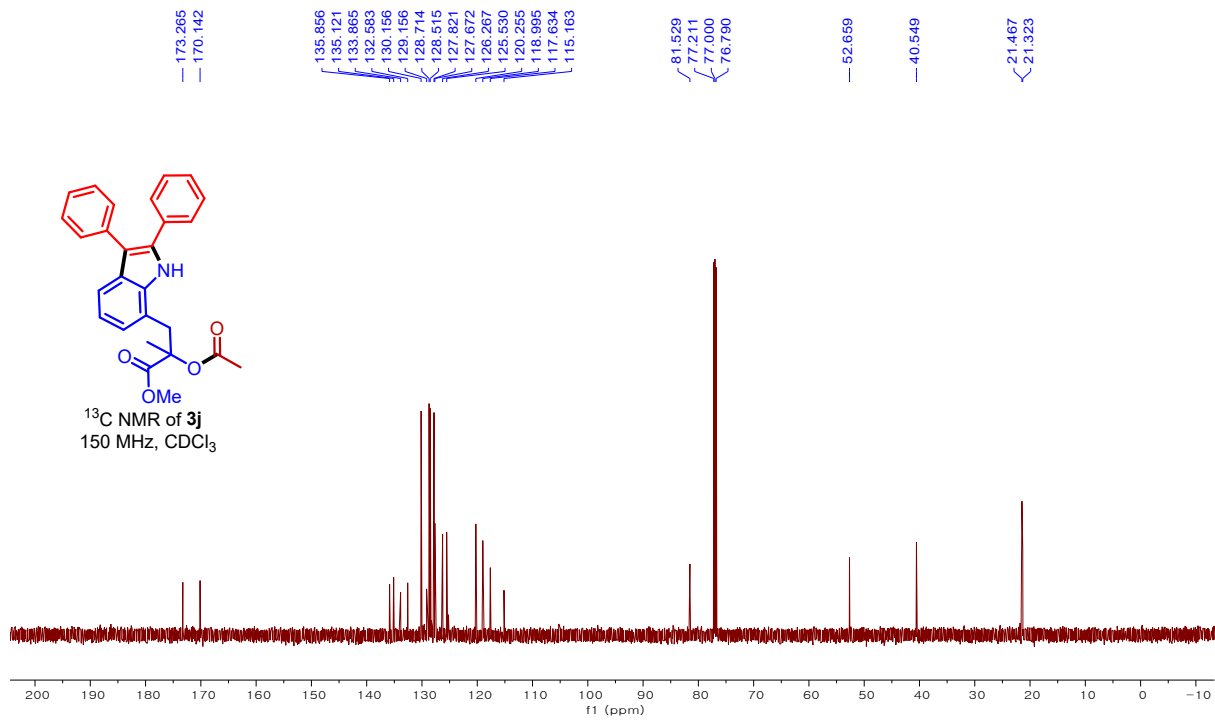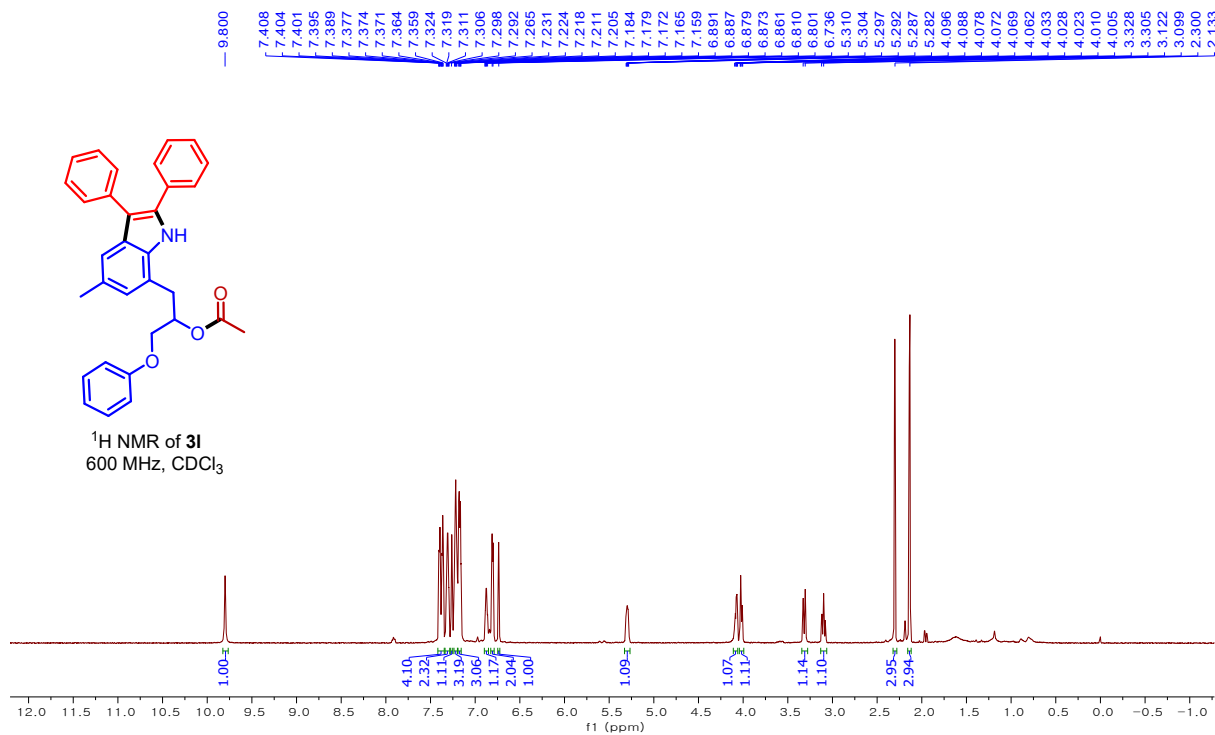



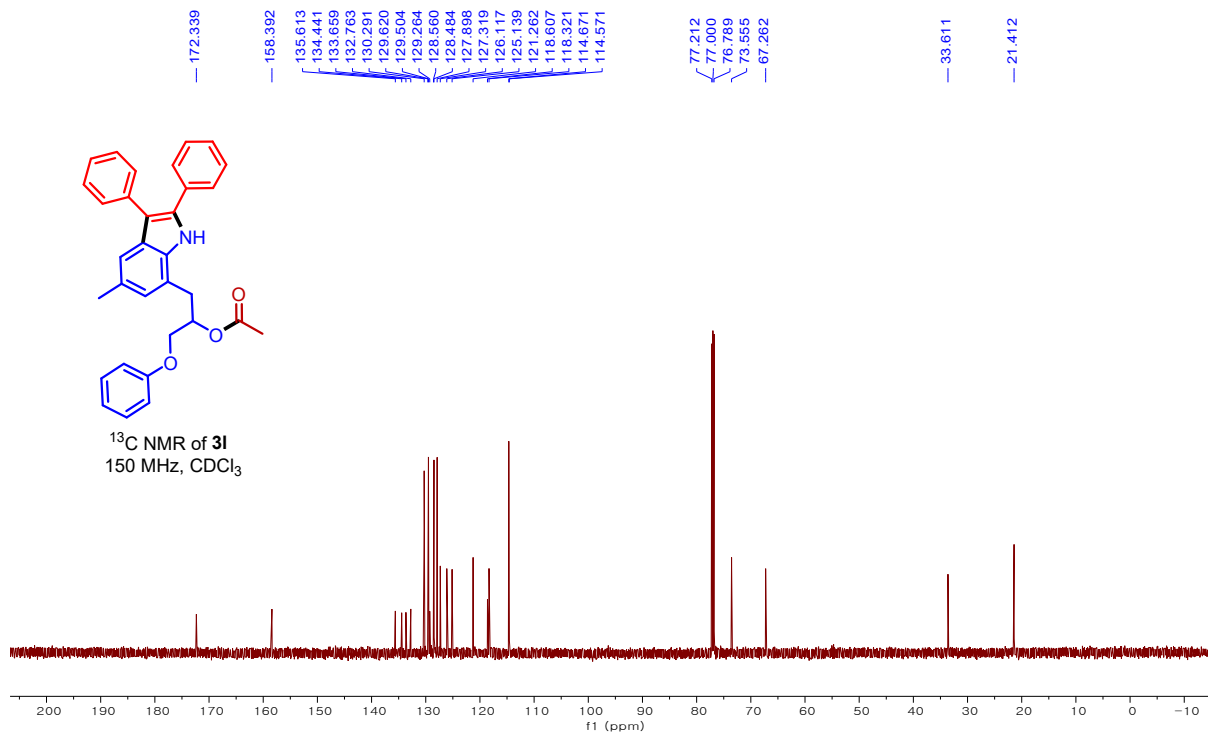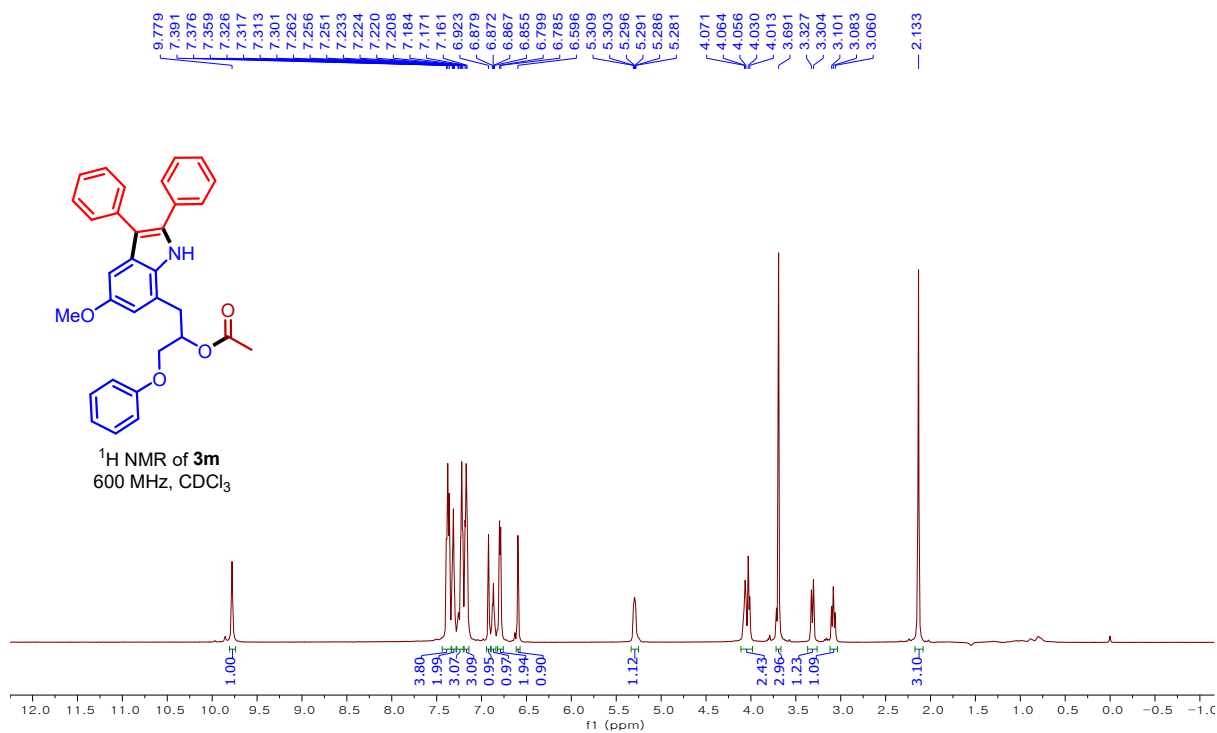

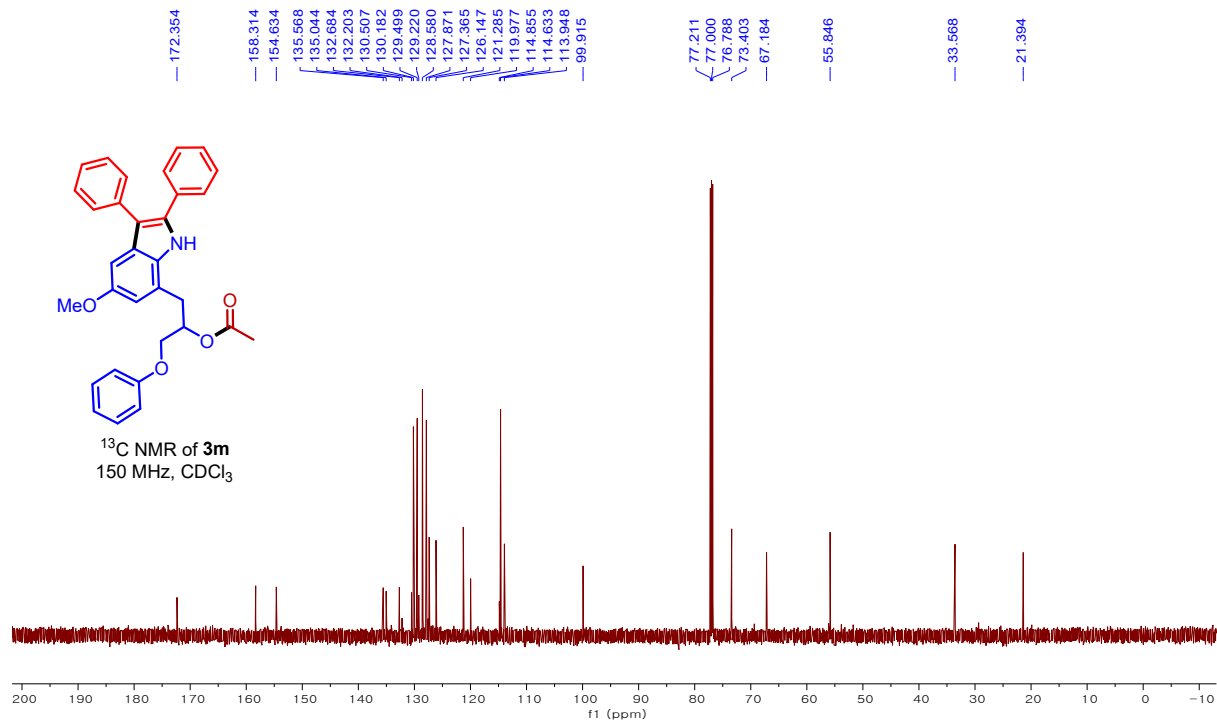

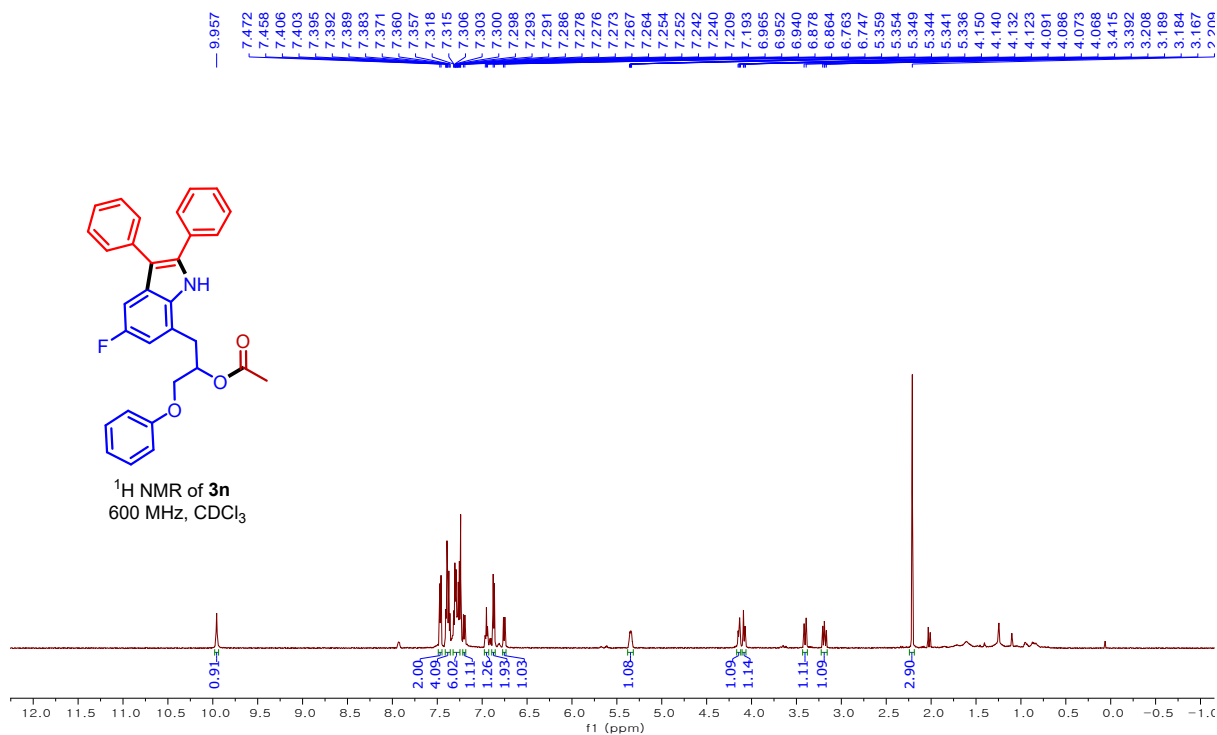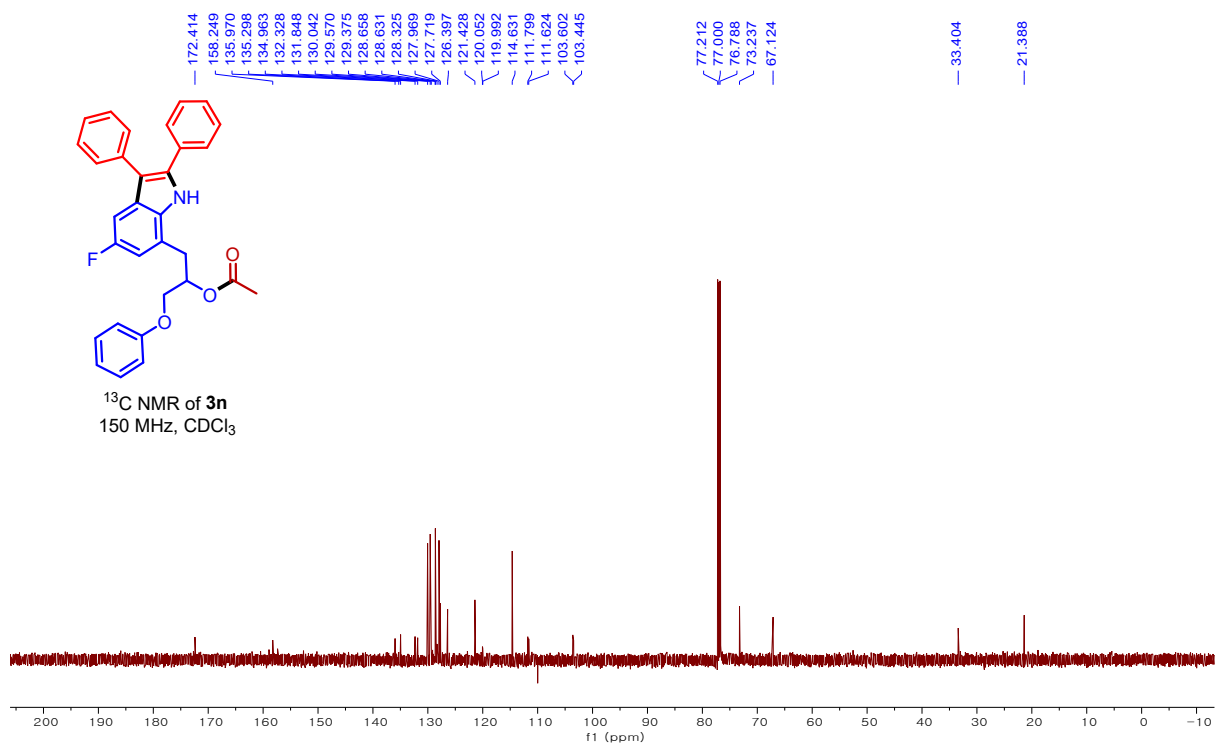

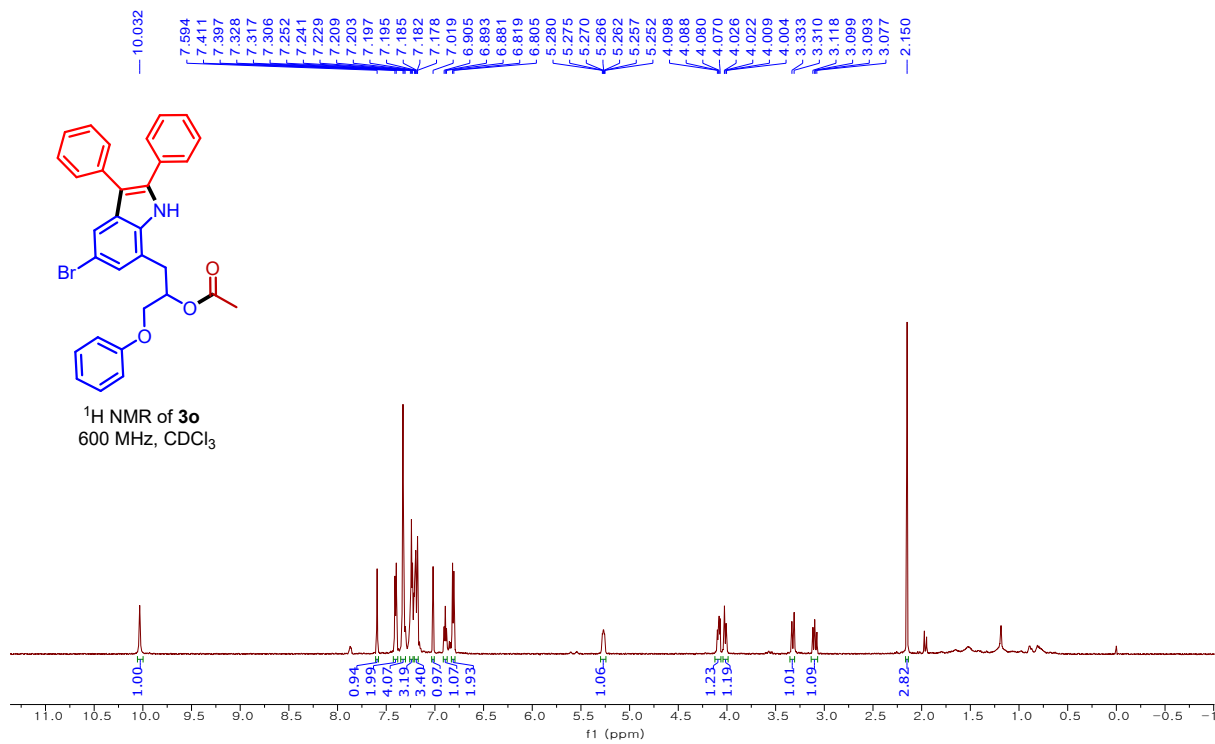

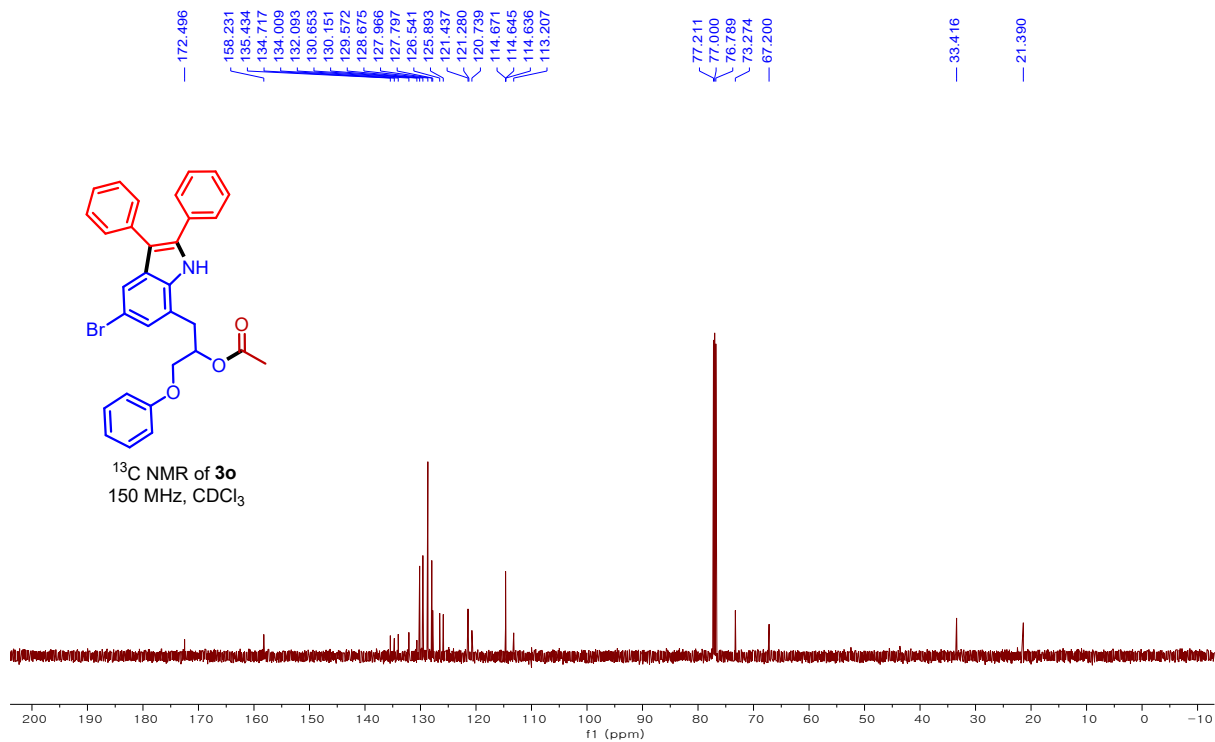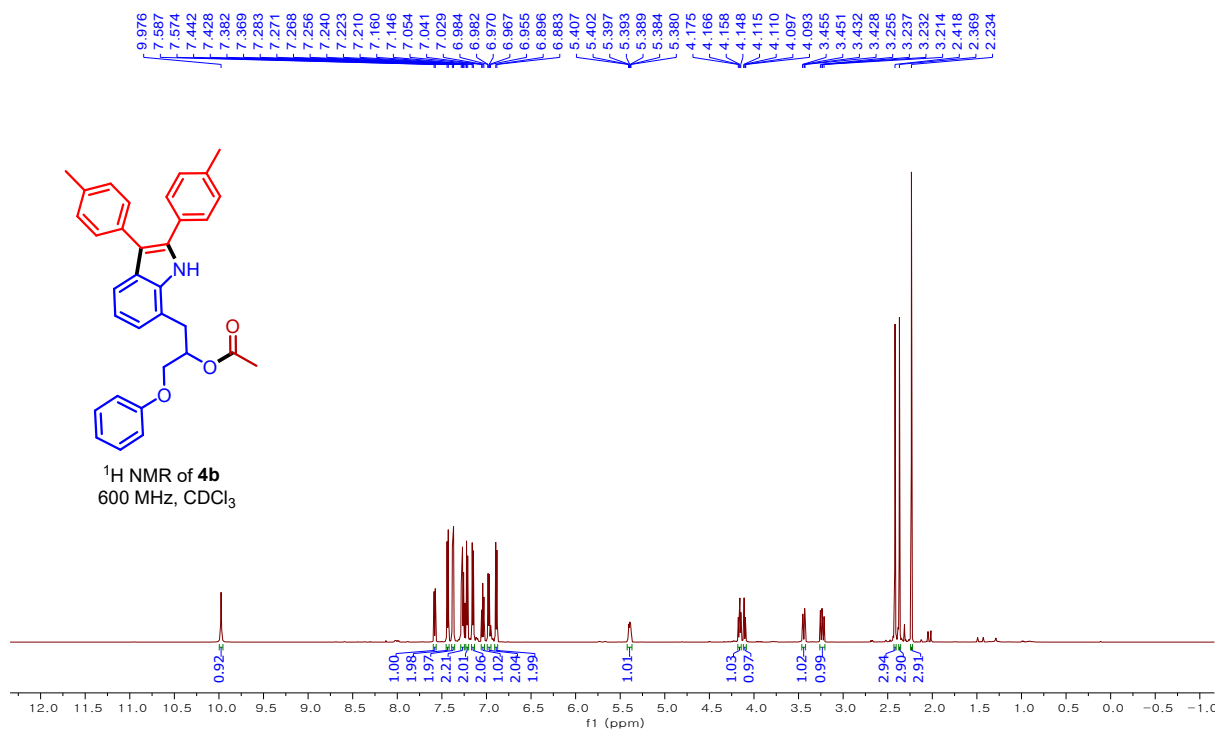

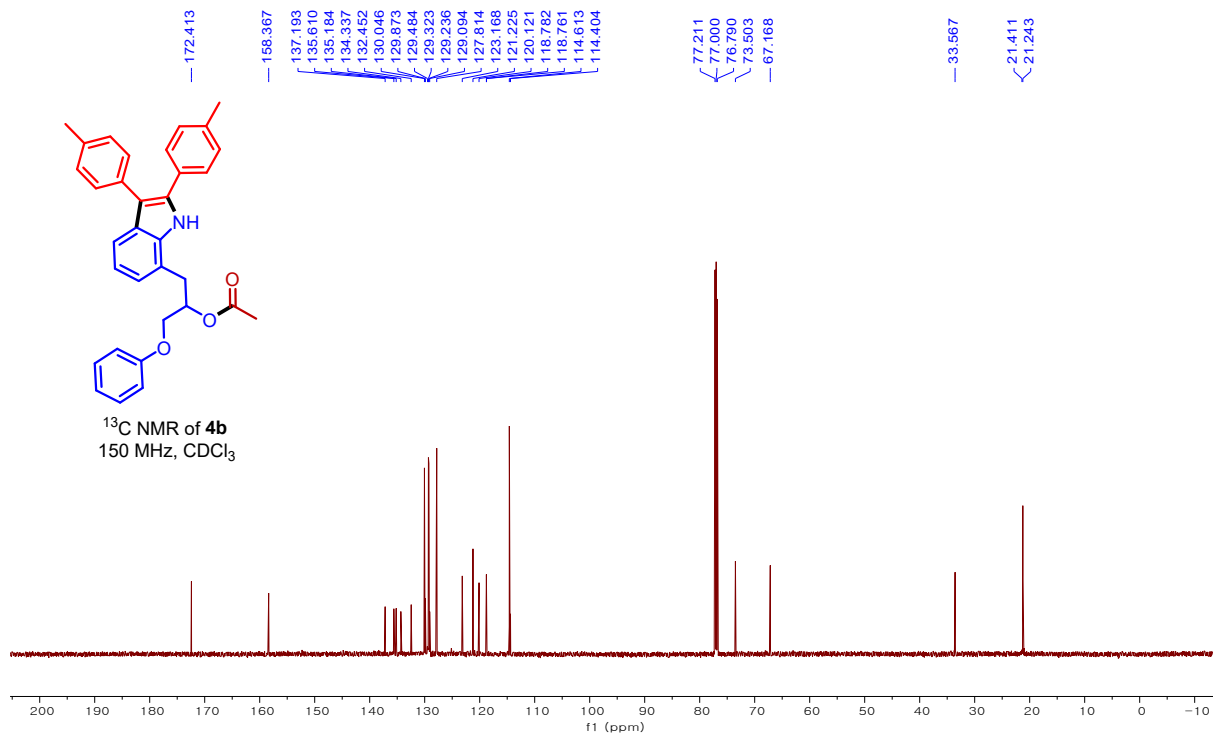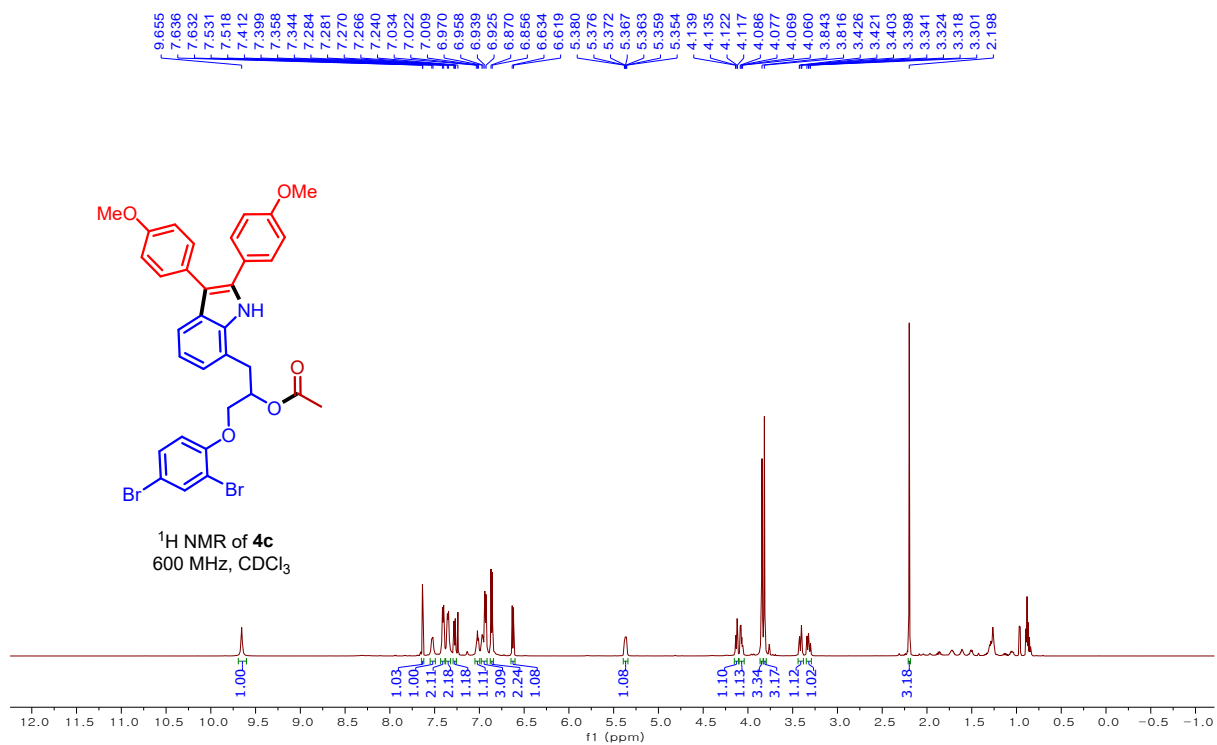

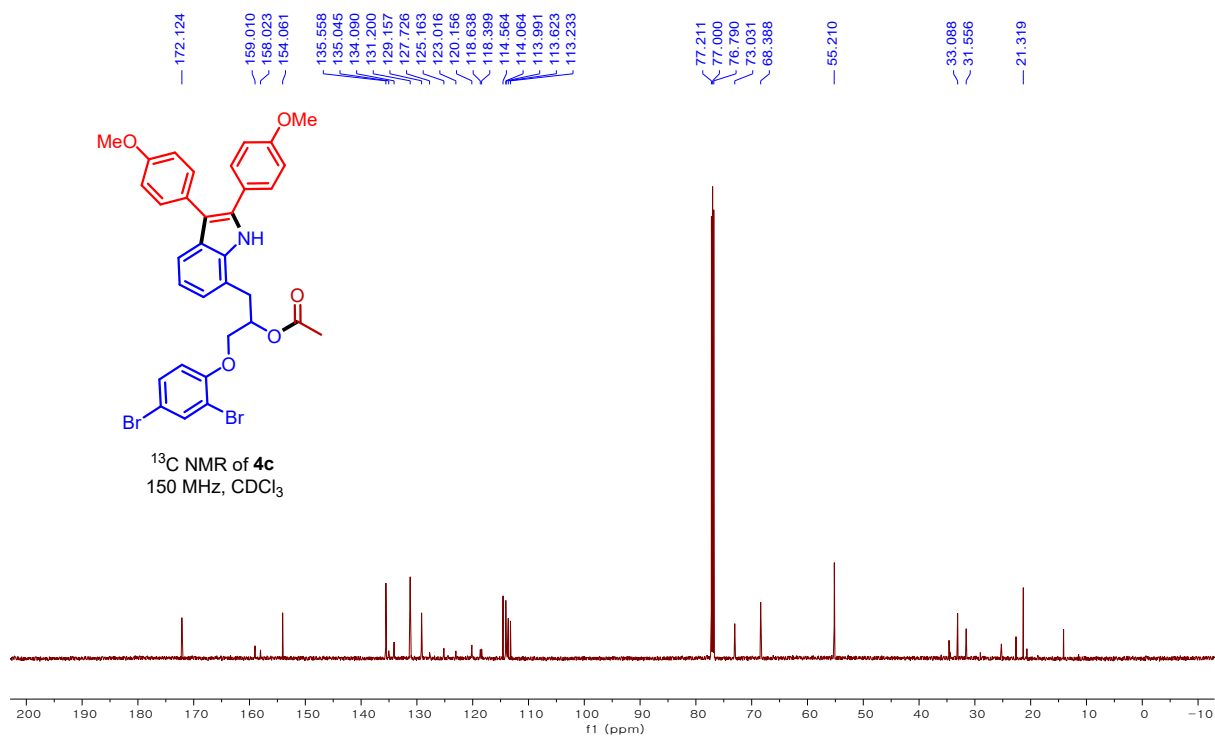

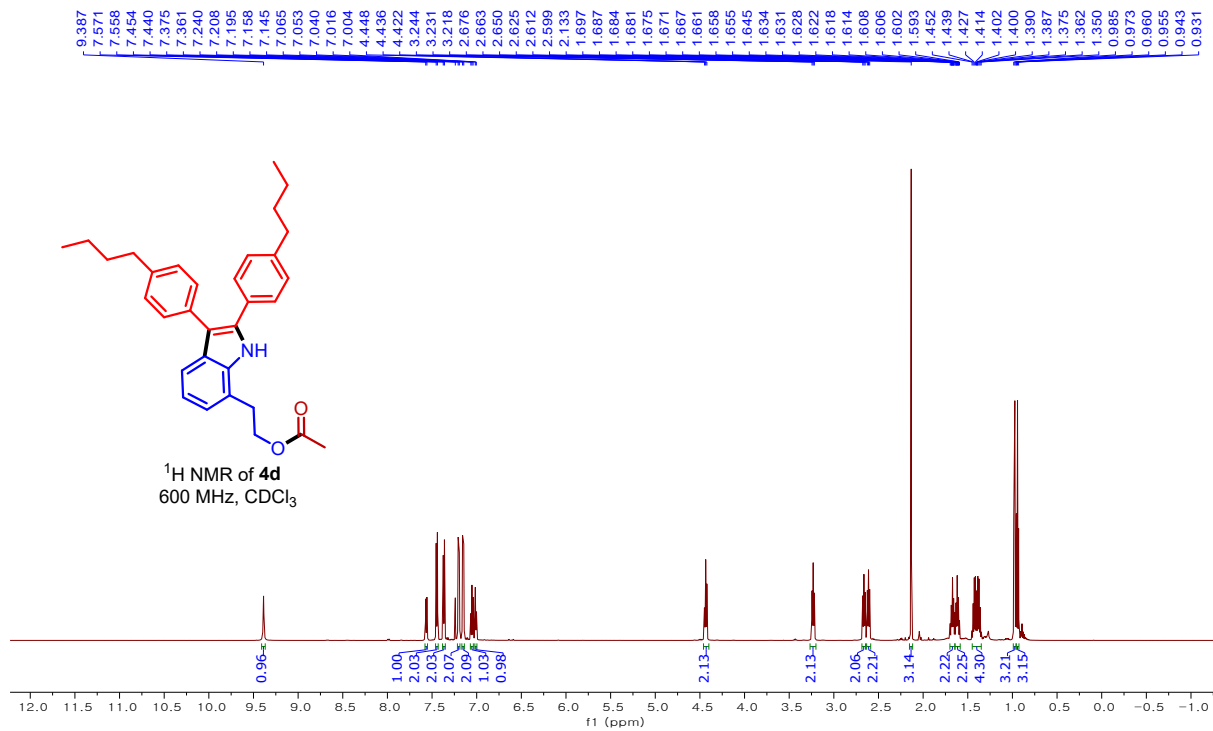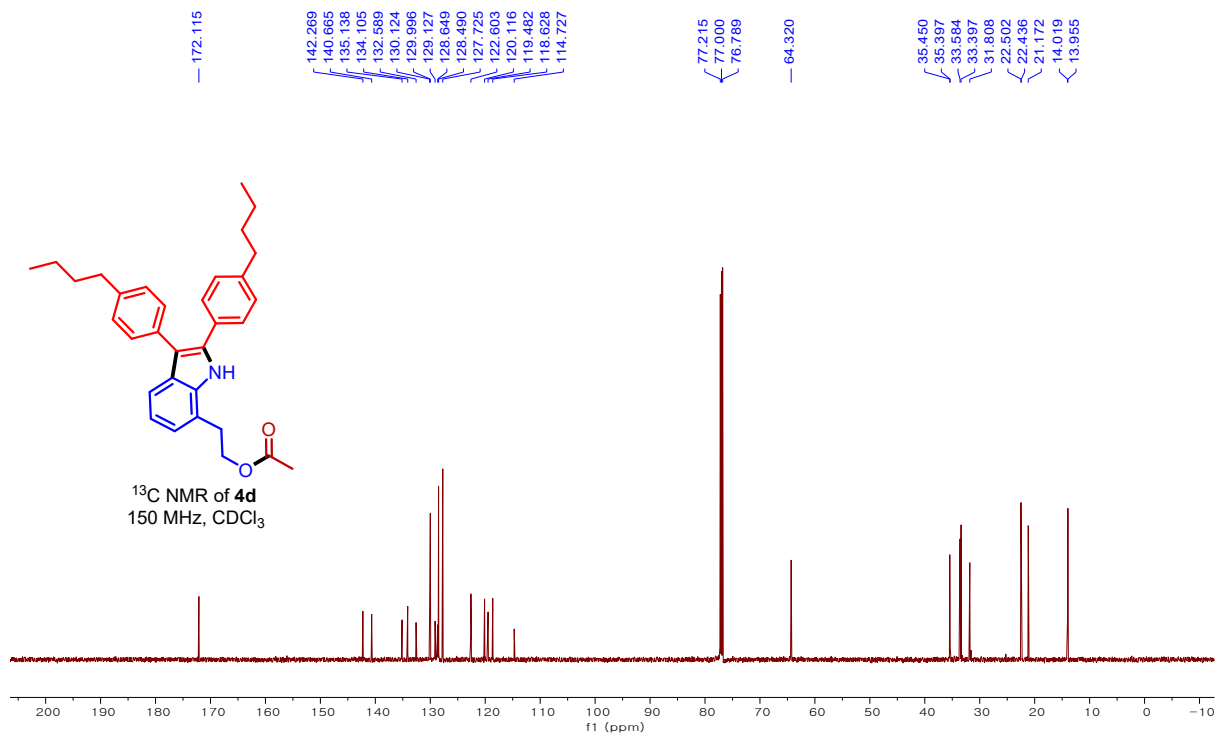



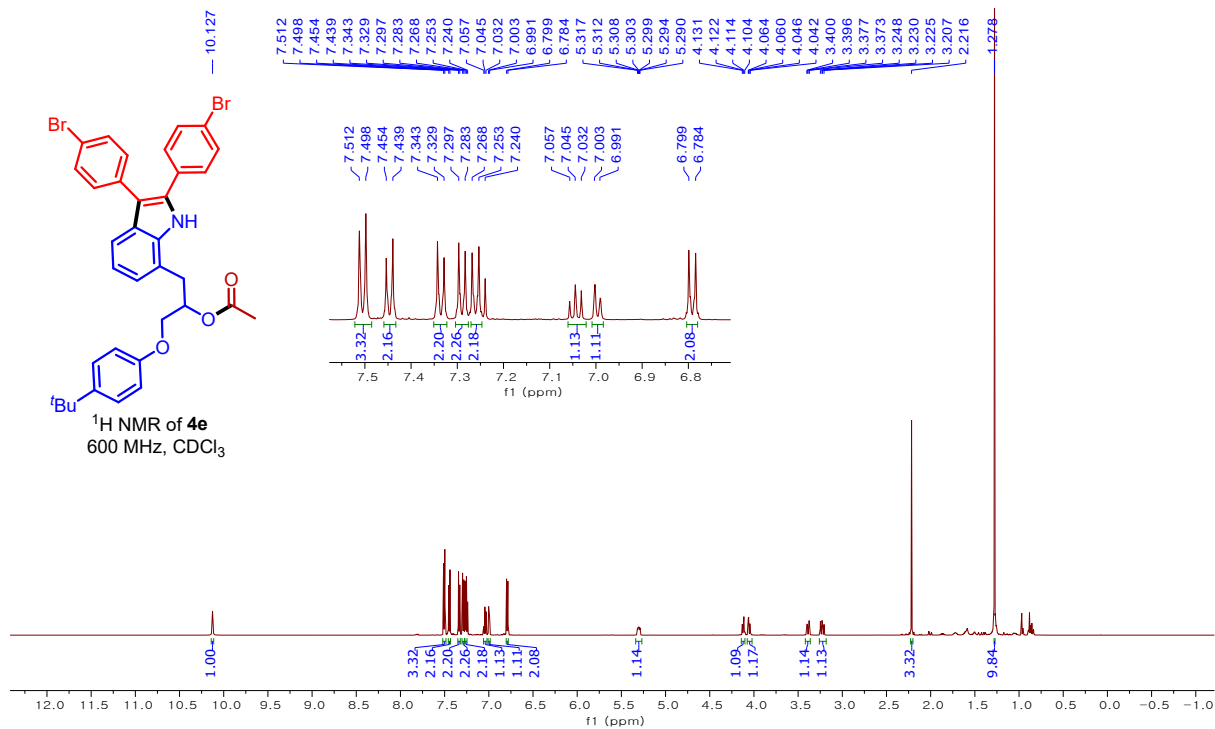

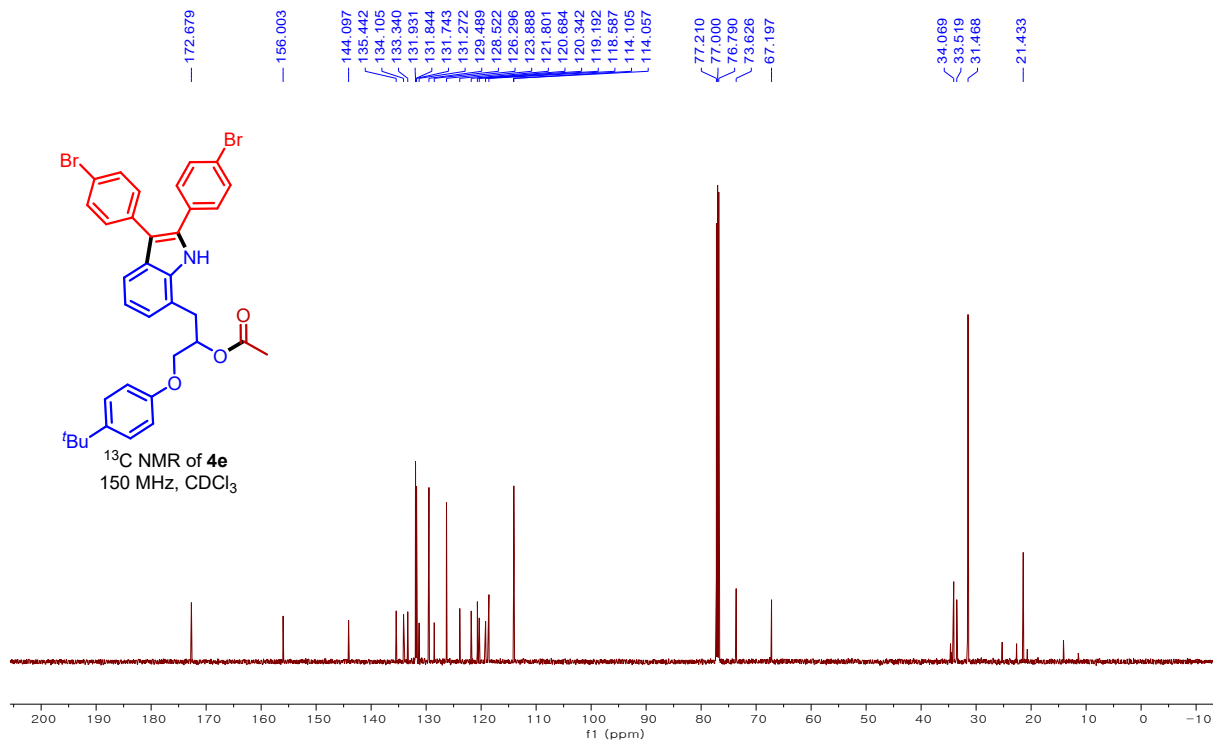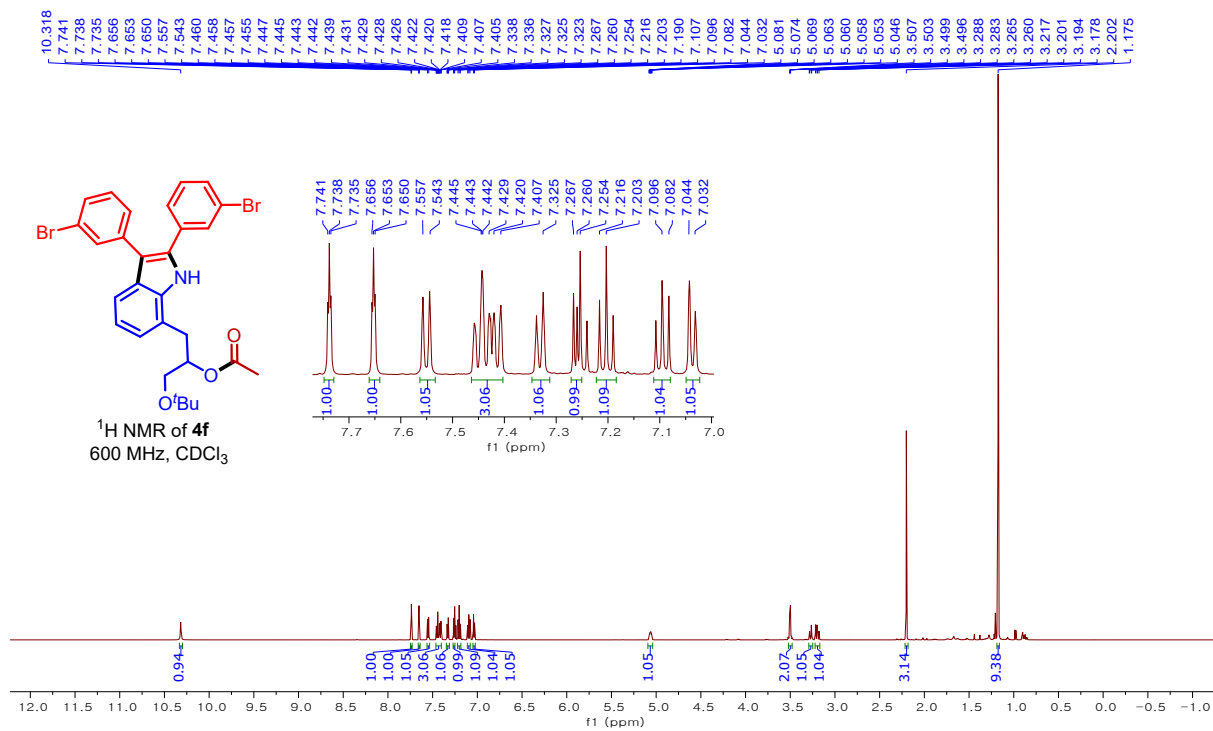

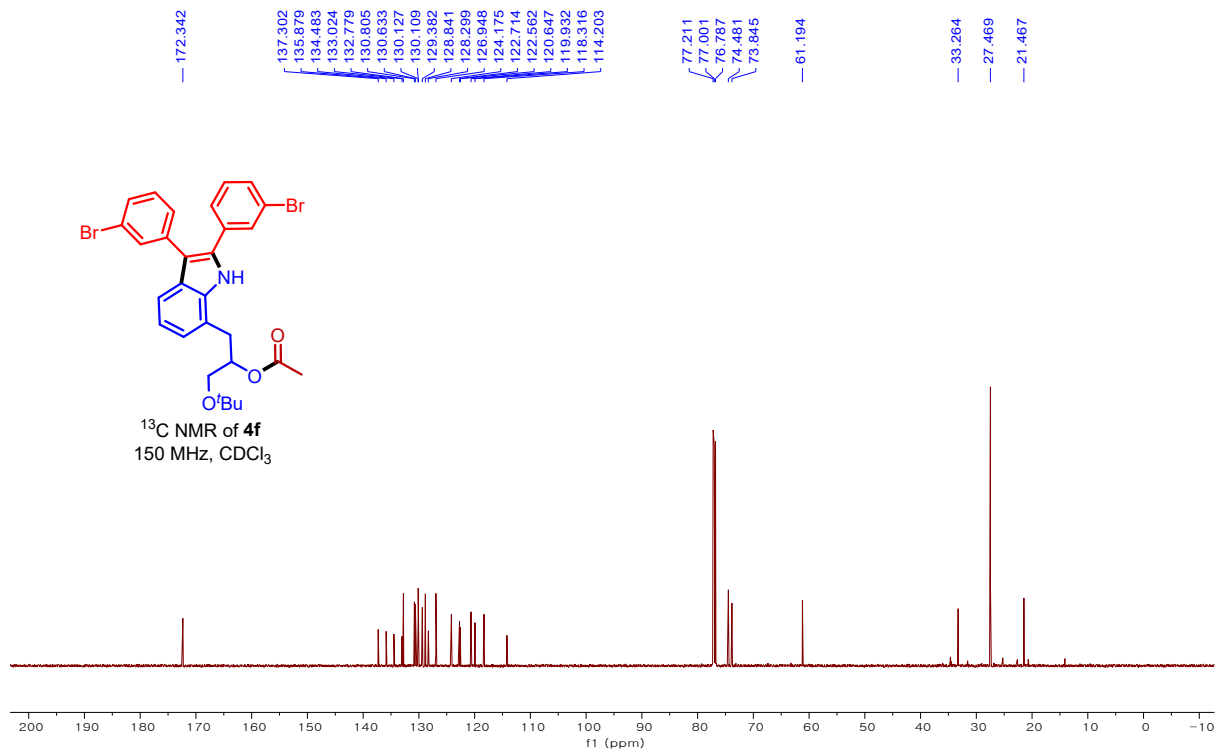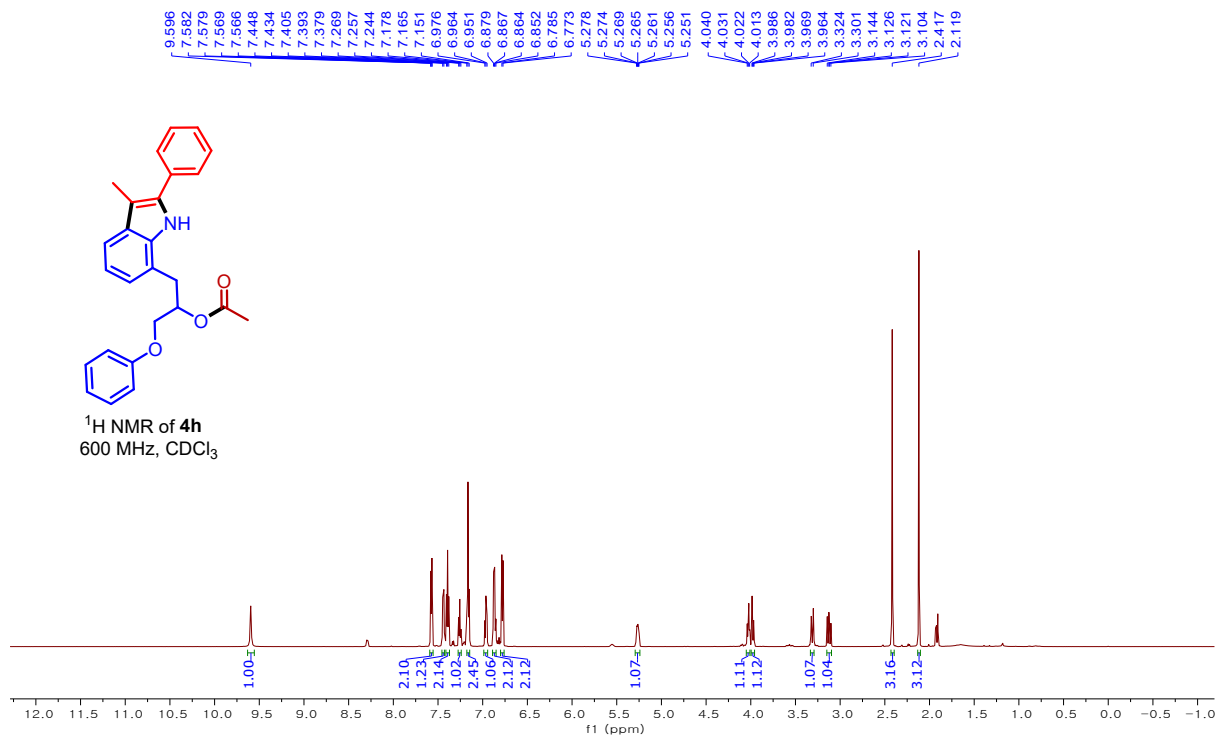

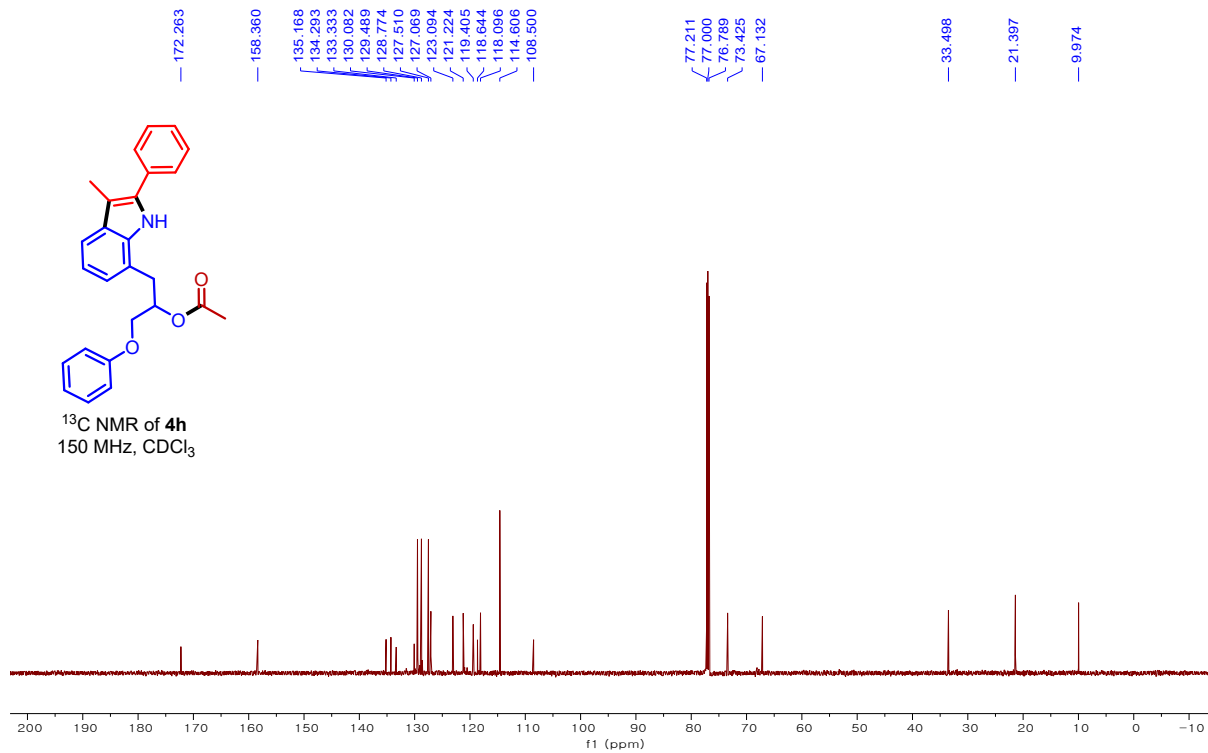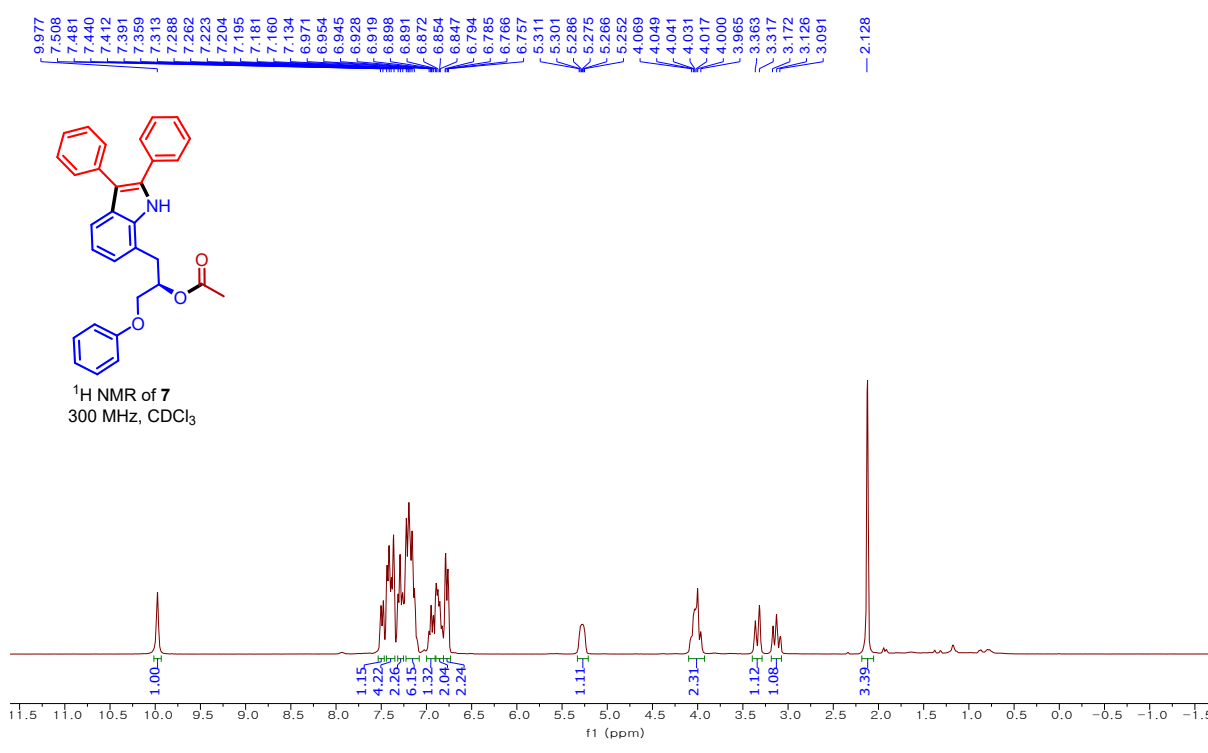

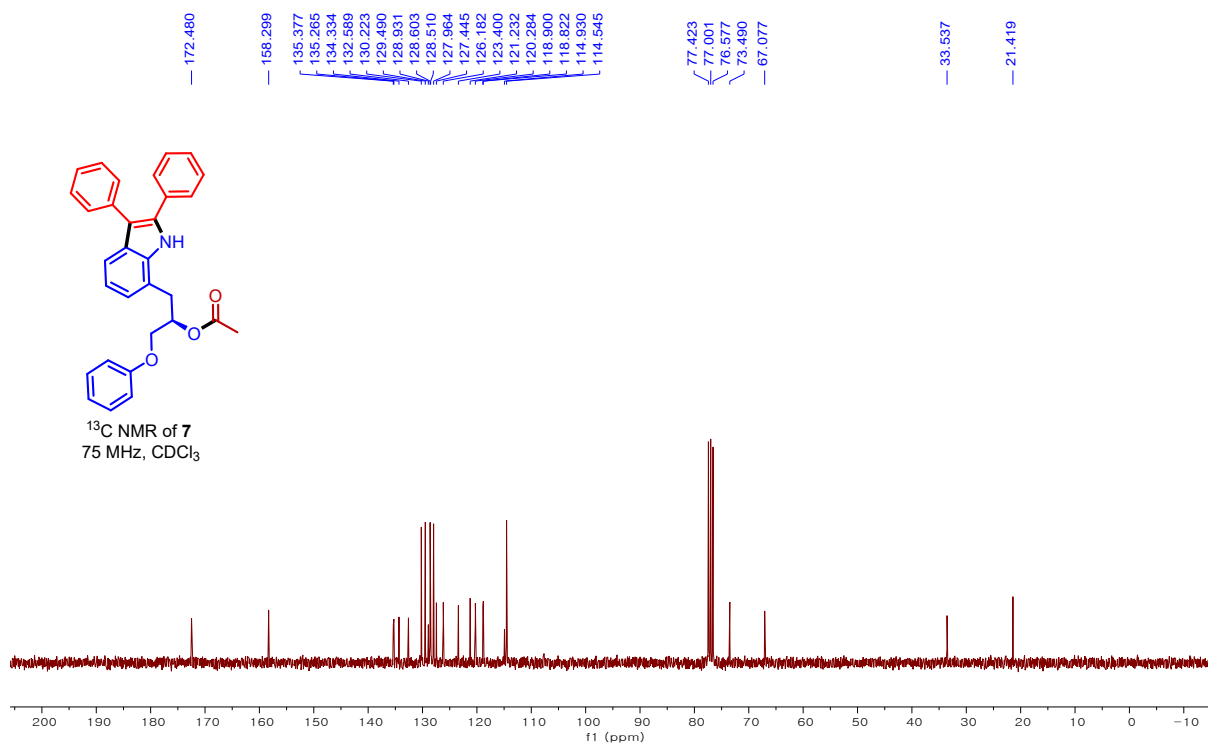

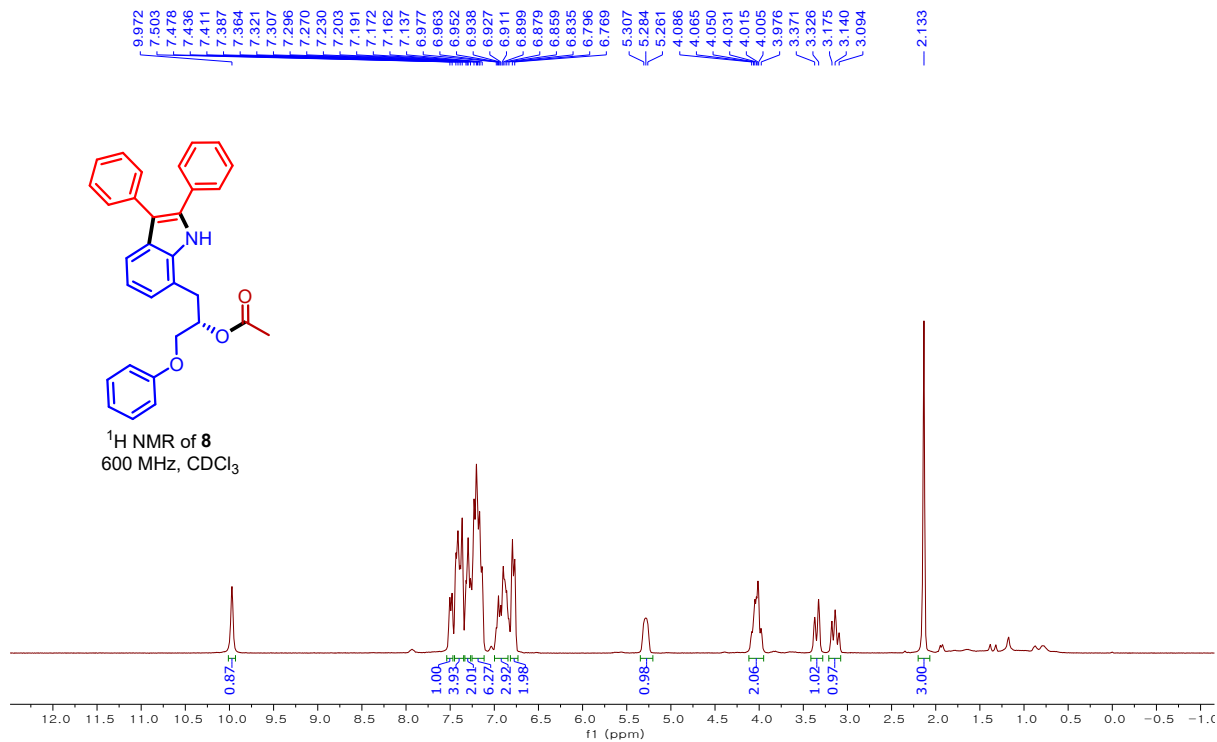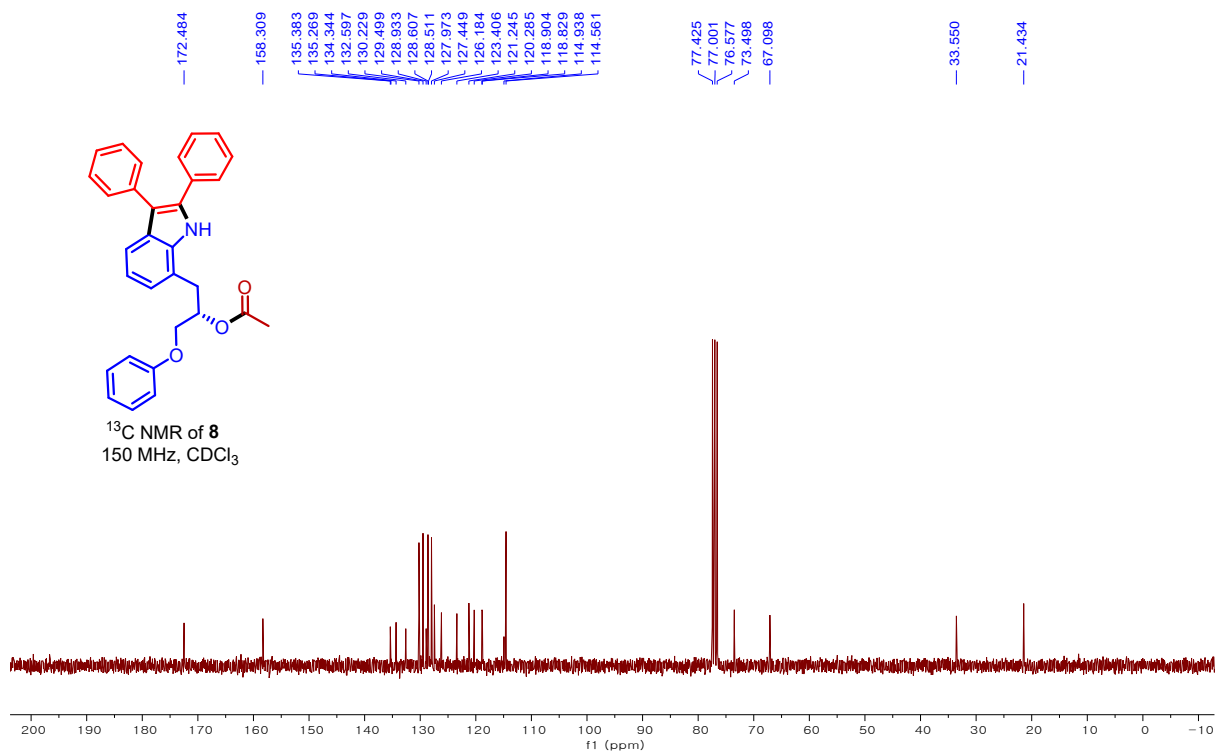

### Crystal refinement data for compound 3a:

The crystal was prepared *via* slow evaporation method using ethyl acetate/hexane as solvents. The crystal structure of the compound **3a** was determined by single-crystal diffraction methods at the Korea Basic Science Institute (KBSI, Western Seoul Center, Korea). Colorless block crystal (0.262 x 0.187 x 0.174 mm<sup>3</sup>) was picked up with paraton oil and mounted on a Bruker D8 Venture PHOTON III M14 diffractometer equipped with a graphite-monochromated Mo K $\alpha$  ( $\lambda$  = 0.71073 Å) radiation source and a nitrogen cold stream (-50 °C). Data collection and integration were performed with SMART APEX3 (Bruker, 2016) and SAINT (Bruker, 2016) [1]. Absorption correction was performed by multi-scan method implemented in SADABS [2]. The structure was solved by direct methods and refined by full-matrix least-squares on  $F^2$  using SHELXTL [3]. All the non-hydrogen atoms were refined anisotropically, and hydrogen atoms were added to their geometrically ideal positions.

1. SMART, SAINT and SADABS, Bruker AXS Inc., Madison, Wisconsin, USA, 2016.
2. G. M. Sheldrick, SADABS v 2.03, University of Göttingen, Germany, 2002.
3. SHELXTL v 6.10; Bruker AXS, Inc: Madison, Wisconsin, USA, 2000.

Empirical Formula- C<sub>31</sub>H<sub>27</sub>NO<sub>3</sub>, M = 461.53, Triclinic, Space group P-1, a = 10.3312(6) Å, b = 11.7235(6) Å, c = 11.9422(6) Å, V = 1348.11(13) Å<sup>3</sup>, Z = 2, T = 223(2) K,  $\rho_{\text{calcd}}$  = 1.137 Mg/m<sup>3</sup>,  $2\Theta_{\text{max}}$  = 25.24<sup>o</sup>, Refinement of 321 parameters on 6716 independent reflections out of 43834 collected reflections ( $R_{\text{int}}$  = 0.0636) led to  $R_1$  = 0.0911 [ $I > 2\sigma(I)$ ],  $wR_2$  = 0.1541 (all data) and S = 1.038 with the largest difference peak and hole of 0.271 and -0.259 e.Å<sup>-3</sup> respectively. The crystal structure has been deposited at the Cambridge Crystallographic Data Centre (CCDC 2092174). The data can be obtained free of charge via the Internet at [www.ccdc.cam.ac.uk/data\\_request/cif](http://www.ccdc.cam.ac.uk/data_request/cif).

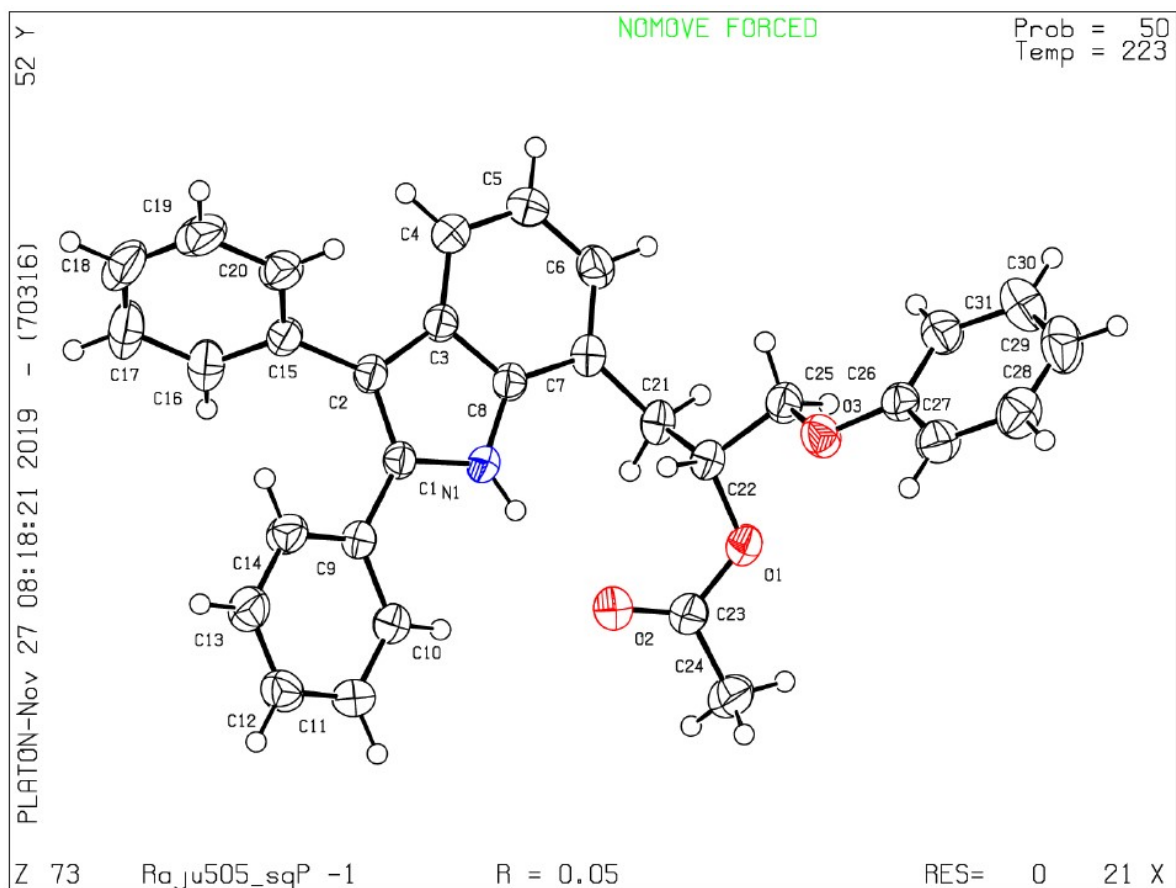

**Figure S3.** X-ray structure of compound **3a** (ellipsoid contour % probability-50).



Table 1. Crystal data and structure refinement for Raju505\_sq.

|                                   |                                                              |                    |
|-----------------------------------|--------------------------------------------------------------|--------------------|
| Identification code               | Raju505_sq                                                   |                    |
| Empirical formula                 | C <sub>31</sub> H <sub>27</sub> N O <sub>3</sub> [+ solvent] |                    |
| Formula weight                    | 461.53                                                       |                    |
| Temperature                       | 223(2) K                                                     |                    |
| Wavelength                        | 0.71073 Å                                                    |                    |
| Crystal system                    | Triclinic                                                    |                    |
| Space group                       | P-1                                                          |                    |
| Unit cell dimensions              | a = 10.3312(6) Å                                             | α = 99.9553(18)°.  |
|                                   | b = 11.7235(6) Å                                             | β = 105.4578(19)°. |
|                                   | c = 11.9422(6) Å                                             | γ = 97.7123(19)°.  |
| Volume                            | 1348.11(13) Å <sup>3</sup>                                   |                    |
| Z                                 | 2                                                            |                    |
| Density (calculated)              | 1.137 Mg/m <sup>3</sup>                                      |                    |
| Absorption coefficient            | 0.073 mm <sup>-1</sup>                                       |                    |
| F(000)                            | 488                                                          |                    |
| Crystal size                      | 0.291 x 0.201 x 0.140 mm <sup>3</sup>                        |                    |
| Theta range for data collection   | 1.796 to 28.349°.                                            |                    |
| Index ranges                      | -13 ≤ h ≤ 13, -15 ≤ k ≤ 15, -15 ≤ l ≤ 15                     |                    |
| Reflections collected             | 43834                                                        |                    |
| Independent reflections           | 6716 [R(int) = 0.0636]                                       |                    |
| Completeness to theta = 25.242°   | 99.9 %                                                       |                    |
| Absorption correction             | Semi-empirical from equivalents                              |                    |
| Max. and min. transmission        | 0.7457 and 0.7046                                            |                    |
| Refinement method                 | Full-matrix least-squares on F <sup>2</sup>                  |                    |
| Data / restraints / parameters    | 6716 / 0 / 321                                               |                    |
| Goodness-of-fit on F <sup>2</sup> | 1.038                                                        |                    |
| Final R indices [I > 2σ(I)]       | R1 = 0.0549, wR2 = 0.1313                                    |                    |
| R indices (all data)              | R1 = 0.0911, wR2 = 0.1541                                    |                    |
| Extinction coefficient            | n/a                                                          |                    |
| Largest diff. peak and hole       | 0.271 and -0.259 e.Å <sup>-3</sup>                           |                    |

Table 2. Atomic coordinates ( $\times 10^4$ ) and equivalent isotropic displacement parameters ( $\text{\AA}^2 \times 10^3$ ) for Raju505\_sq.  $U(\text{eq})$  is defined as one third of the trace of the orthogonalized  $U^{ij}$  tensor.

|       | x       | y        | z        | U(eq) |
|-------|---------|----------|----------|-------|
| N(1)  | 1673(2) | -406(1)  | 1094(1)  | 33(1) |
| C(1)  | 1705(2) | -1538(2) | 1273(2)  | 32(1) |
| C(2)  | 1074(2) | -1700(2) | 2137(2)  | 33(1) |
| C(3)  | 672(2)  | -607(2)  | 2521(2)  | 33(1) |
| C(4)  | -5(2)   | -230(2)  | 3350(2)  | 39(1) |
| C(5)  | -272(2) | 892(2)   | 3472(2)  | 43(1) |
| C(6)  | 107(2)  | 1653(2)  | 2780(2)  | 40(1) |
| C(7)  | 776(2)  | 1318(2)  | 1951(2)  | 34(1) |
| C(8)  | 1053(2) | 175(2)   | 1843(2)  | 32(1) |
| C(9)  | 2393(2) | -2313(2) | 616(2)   | 34(1) |
| C(10) | 2705(2) | -2066(2) | -394(2)  | 40(1) |
| C(11) | 3372(2) | -2791(2) | -992(2)  | 45(1) |
| C(12) | 3728(2) | -3778(2) | -608(2)  | 45(1) |
| C(13) | 3437(2) | -4036(2) | 391(2)   | 48(1) |
| C(14) | 2789(2) | -3306(2) | 1008(2)  | 42(1) |
| C(15) | 818(2)  | -2770(2) | 2608(2)  | 35(1) |
| C(16) | 33(2)   | -3828(2) | 1879(2)  | 48(1) |
| C(17) | -171(3) | -4820(2) | 2348(3)  | 62(1) |
| C(18) | 380(3)  | -4761(2) | 3539(3)  | 69(1) |
| C(19) | 1134(3) | -3720(2) | 4275(2)  | 63(1) |
| C(20) | 1349(2) | -2723(2) | 3815(2)  | 47(1) |
| C(21) | 1138(2) | 2092(2)  | 1153(2)  | 37(1) |
| C(22) | 2667(2) | 2560(2)  | 1428(2)  | 36(1) |
| O(1)  | 2927(1) | 2858(1)  | 365(1)   | 41(1) |
| C(23) | 2988(2) | 1957(2)  | -472(2)  | 44(1) |
| O(2)  | 2907(2) | 952(1)   | -350(1)  | 56(1) |
| C(24) | 3146(3) | 2347(2)  | -1561(2) | 58(1) |
| C(25) | 3132(2) | 3681(2)  | 2373(2)  | 38(1) |
| O(3)  | 4583(1) | 3987(1)  | 2684(1)  | 44(1) |
| C(26) | 5198(2) | 5084(2)  | 3395(2)  | 38(1) |
| C(27) | 6595(2) | 5398(2)  | 3584(2)  | 46(1) |
| C(28) | 7290(2) | 6494(2)  | 4262(2)  | 54(1) |

|       |         |         |         |       |
|-------|---------|---------|---------|-------|
| C(29) | 6614(3) | 7276(2) | 4762(2) | 61(1) |
| C(30) | 5229(3) | 6948(2) | 4586(2) | 59(1) |
| C(31) | 4510(2) | 5852(2) | 3906(2) | 46(1) |

---

Table 3. Bond lengths [ $\text{\AA}$ ] and angles [ $^\circ$ ] for Raju505\_sq.

---

|             |          |
|-------------|----------|
| N(1)-C(8)   | 1.373(2) |
| N(1)-C(1)   | 1.384(2) |
| N(1)-H(1)   | 0.85(2)  |
| C(1)-C(2)   | 1.385(2) |
| C(1)-C(9)   | 1.473(2) |
| C(2)-C(3)   | 1.437(2) |
| C(2)-C(15)  | 1.482(2) |
| C(3)-C(4)   | 1.402(3) |
| C(3)-C(8)   | 1.407(2) |
| C(4)-C(5)   | 1.372(3) |
| C(4)-H(4)   | 0.9400   |
| C(5)-C(6)   | 1.402(3) |
| C(5)-H(5)   | 0.9400   |
| C(6)-C(7)   | 1.384(3) |
| C(6)-H(6)   | 0.9400   |
| C(7)-C(8)   | 1.399(2) |
| C(7)-C(21)  | 1.507(2) |
| C(9)-C(10)  | 1.395(2) |
| C(9)-C(14)  | 1.399(3) |
| C(10)-C(11) | 1.384(3) |
| C(10)-H(10) | 0.9400   |
| C(11)-C(12) | 1.376(3) |
| C(11)-H(11) | 0.9400   |
| C(12)-C(13) | 1.378(3) |
| C(12)-H(12) | 0.9400   |
| C(13)-C(14) | 1.386(3) |
| C(13)-H(13) | 0.9400   |
| C(14)-H(14) | 0.9400   |
| C(15)-C(20) | 1.388(3) |

|              |          |
|--------------|----------|
| C(15)-C(16)  | 1.391(3) |
| C(16)-C(17)  | 1.390(3) |
| C(16)-H(16)  | 0.9400   |
| C(17)-C(18)  | 1.369(4) |
| C(17)-H(17)  | 0.9400   |
| C(18)-C(19)  | 1.371(4) |
| C(18)-H(18)  | 0.9400   |
| C(19)-C(20)  | 1.390(3) |
| C(19)-H(19)  | 0.9400   |
| C(20)-H(20)  | 0.9400   |
| C(21)-C(22)  | 1.528(3) |
| C(21)-H(21A) | 0.9800   |
| C(21)-H(21B) | 0.9800   |
| C(22)-O(1)   | 1.455(2) |
| C(22)-C(25)  | 1.504(3) |
| C(22)-H(22)  | 0.9900   |
| O(1)-C(23)   | 1.343(2) |
| C(23)-O(2)   | 1.207(2) |
| C(23)-C(24)  | 1.492(3) |
| C(24)-H(24A) | 0.9700   |
| C(24)-H(24B) | 0.9700   |
| C(24)-H(24C) | 0.9700   |
| C(25)-O(3)   | 1.424(2) |
| C(25)-H(25A) | 0.9800   |
| C(25)-H(25B) | 0.9800   |
| O(3)-C(26)   | 1.377(2) |
| C(26)-C(31)  | 1.378(3) |
| C(26)-C(27)  | 1.387(3) |
| C(27)-C(28)  | 1.380(3) |
| C(27)-H(27)  | 0.9400   |
| C(28)-C(29)  | 1.375(4) |
| C(28)-H(28)  | 0.9400   |
| C(29)-C(30)  | 1.380(4) |
| C(29)-H(29)  | 0.9400   |
| C(30)-C(31)  | 1.387(3) |
| C(30)-H(30)  | 0.9400   |
| C(31)-H(31)  | 0.9400   |

|                   |            |
|-------------------|------------|
| C(8)-N(1)-C(1)    | 109.72(15) |
| C(8)-N(1)-H(1)    | 125.8(15)  |
| C(1)-N(1)-H(1)    | 123.9(15)  |
| N(1)-C(1)-C(2)    | 108.46(15) |
| N(1)-C(1)-C(9)    | 119.80(15) |
| C(2)-C(1)-C(9)    | 131.69(16) |
| C(1)-C(2)-C(3)    | 107.02(15) |
| C(1)-C(2)-C(15)   | 128.85(16) |
| C(3)-C(2)-C(15)   | 124.12(16) |
| C(4)-C(3)-C(8)    | 119.13(16) |
| C(4)-C(3)-C(2)    | 133.82(17) |
| C(8)-C(3)-C(2)    | 107.03(15) |
| C(5)-C(4)-C(3)    | 118.63(18) |
| C(5)-C(4)-H(4)    | 120.7      |
| C(3)-C(4)-H(4)    | 120.7      |
| C(4)-C(5)-C(6)    | 121.25(18) |
| C(4)-C(5)-H(5)    | 119.4      |
| C(6)-C(5)-H(5)    | 119.4      |
| C(7)-C(6)-C(5)    | 122.03(17) |
| C(7)-C(6)-H(6)    | 119.0      |
| C(5)-C(6)-H(6)    | 119.0      |
| C(6)-C(7)-C(8)    | 116.14(16) |
| C(6)-C(7)-C(21)   | 123.34(16) |
| C(8)-C(7)-C(21)   | 120.45(16) |
| N(1)-C(8)-C(7)    | 129.42(16) |
| N(1)-C(8)-C(3)    | 107.75(15) |
| C(7)-C(8)-C(3)    | 122.82(16) |
| C(10)-C(9)-C(14)  | 117.74(17) |
| C(10)-C(9)-C(1)   | 121.37(16) |
| C(14)-C(9)-C(1)   | 120.86(16) |
| C(11)-C(10)-C(9)  | 120.80(18) |
| C(11)-C(10)-H(10) | 119.6      |
| C(9)-C(10)-H(10)  | 119.6      |
| C(12)-C(11)-C(10) | 120.63(19) |
| C(12)-C(11)-H(11) | 119.7      |
| C(10)-C(11)-H(11) | 119.7      |

|                     |            |
|---------------------|------------|
| C(11)-C(12)-C(13)   | 119.60(19) |
| C(11)-C(12)-H(12)   | 120.2      |
| C(13)-C(12)-H(12)   | 120.2      |
| C(12)-C(13)-C(14)   | 120.25(19) |
| C(12)-C(13)-H(13)   | 119.9      |
| C(14)-C(13)-H(13)   | 119.9      |
| C(13)-C(14)-C(9)    | 120.94(18) |
| C(13)-C(14)-H(14)   | 119.5      |
| C(9)-C(14)-H(14)    | 119.5      |
| C(20)-C(15)-C(16)   | 118.28(18) |
| C(20)-C(15)-C(2)    | 119.70(17) |
| C(16)-C(15)-C(2)    | 122.01(18) |
| C(17)-C(16)-C(15)   | 120.5(2)   |
| C(17)-C(16)-H(16)   | 119.8      |
| C(15)-C(16)-H(16)   | 119.8      |
| C(18)-C(17)-C(16)   | 120.4(2)   |
| C(18)-C(17)-H(17)   | 119.8      |
| C(16)-C(17)-H(17)   | 119.8      |
| C(17)-C(18)-C(19)   | 120.0(2)   |
| C(17)-C(18)-H(18)   | 120.0      |
| C(19)-C(18)-H(18)   | 120.0      |
| C(18)-C(19)-C(20)   | 120.2(2)   |
| C(18)-C(19)-H(19)   | 119.9      |
| C(20)-C(19)-H(19)   | 119.9      |
| C(15)-C(20)-C(19)   | 120.7(2)   |
| C(15)-C(20)-H(20)   | 119.7      |
| C(19)-C(20)-H(20)   | 119.7      |
| C(7)-C(21)-C(22)    | 114.71(15) |
| C(7)-C(21)-H(21A)   | 108.6      |
| C(22)-C(21)-H(21A)  | 108.6      |
| C(7)-C(21)-H(21B)   | 108.6      |
| C(22)-C(21)-H(21B)  | 108.6      |
| H(21A)-C(21)-H(21B) | 107.6      |
| O(1)-C(22)-C(25)    | 106.26(14) |
| O(1)-C(22)-C(21)    | 108.82(15) |
| C(25)-C(22)-C(21)   | 111.38(15) |
| O(1)-C(22)-H(22)    | 110.1      |

|                     |            |
|---------------------|------------|
| C(25)-C(22)-H(22)   | 110.1      |
| C(21)-C(22)-H(22)   | 110.1      |
| C(23)-O(1)-C(22)    | 116.51(14) |
| O(2)-C(23)-O(1)     | 123.34(18) |
| O(2)-C(23)-C(24)    | 124.56(19) |
| O(1)-C(23)-C(24)    | 112.10(17) |
| C(23)-C(24)-H(24A)  | 109.5      |
| C(23)-C(24)-H(24B)  | 109.5      |
| H(24A)-C(24)-H(24B) | 109.5      |
| C(23)-C(24)-H(24C)  | 109.5      |
| H(24A)-C(24)-H(24C) | 109.5      |
| H(24B)-C(24)-H(24C) | 109.5      |
| O(3)-C(25)-C(22)    | 108.22(15) |
| O(3)-C(25)-H(25A)   | 110.1      |
| C(22)-C(25)-H(25A)  | 110.1      |
| O(3)-C(25)-H(25B)   | 110.1      |
| C(22)-C(25)-H(25B)  | 110.1      |
| H(25A)-C(25)-H(25B) | 108.4      |
| C(26)-O(3)-C(25)    | 117.38(14) |
| O(3)-C(26)-C(31)    | 123.98(18) |
| O(3)-C(26)-C(27)    | 115.80(17) |
| C(31)-C(26)-C(27)   | 120.23(19) |
| C(28)-C(27)-C(26)   | 119.8(2)   |
| C(28)-C(27)-H(27)   | 120.1      |
| C(26)-C(27)-H(27)   | 120.1      |
| C(29)-C(28)-C(27)   | 120.7(2)   |
| C(29)-C(28)-H(28)   | 119.7      |
| C(27)-C(28)-H(28)   | 119.7      |
| C(28)-C(29)-C(30)   | 119.1(2)   |
| C(28)-C(29)-H(29)   | 120.4      |
| C(30)-C(29)-H(29)   | 120.4      |
| C(29)-C(30)-C(31)   | 121.2(2)   |
| C(29)-C(30)-H(30)   | 119.4      |
| C(31)-C(30)-H(30)   | 119.4      |
| C(26)-C(31)-C(30)   | 119.0(2)   |
| C(26)-C(31)-H(31)   | 120.5      |
| C(30)-C(31)-H(31)   | 120.5      |

Symmetry transformations used to generate equivalent atoms:

Table 4. Anisotropic displacement parameters ( $\text{\AA}^2 \times 10^3$ ) for Raju505\_sq. The anisotropic displacement factor exponent takes the form:  $-2\pi^2 [ h^2 a^{*2} U^{11} + \dots + 2 h k a^* b^* U^{12} ]$

|       | U <sup>11</sup> | U <sup>22</sup> | U <sup>33</sup> | U <sup>23</sup> | U <sup>13</sup> | U <sup>12</sup> |
|-------|-----------------|-----------------|-----------------|-----------------|-----------------|-----------------|
| N(1)  | 39(1)           | 27(1)           | 37(1)           | 11(1)           | 15(1)           | 5(1)            |
| C(1)  | 35(1)           | 26(1)           | 33(1)           | 8(1)            | 9(1)            | 5(1)            |
| C(2)  | 36(1)           | 29(1)           | 35(1)           | 9(1)            | 10(1)           | 4(1)            |
| C(3)  | 34(1)           | 30(1)           | 34(1)           | 8(1)            | 10(1)           | 3(1)            |
| C(4)  | 42(1)           | 38(1)           | 41(1)           | 11(1)           | 16(1)           | 6(1)            |
| C(5)  | 47(1)           | 42(1)           | 45(1)           | 6(1)            | 21(1)           | 11(1)           |
| C(6)  | 41(1)           | 32(1)           | 48(1)           | 6(1)            | 14(1)           | 9(1)            |
| C(7)  | 32(1)           | 30(1)           | 38(1)           | 9(1)            | 6(1)            | 4(1)            |
| C(8)  | 33(1)           | 29(1)           | 33(1)           | 7(1)            | 9(1)            | 3(1)            |
| C(9)  | 34(1)           | 30(1)           | 36(1)           | 7(1)            | 11(1)           | 3(1)            |
| C(10) | 51(1)           | 33(1)           | 41(1)           | 12(1)           | 17(1)           | 9(1)            |
| C(11) | 54(1)           | 45(1)           | 41(1)           | 9(1)            | 23(1)           | 8(1)            |
| C(12) | 44(1)           | 43(1)           | 51(1)           | 5(1)            | 19(1)           | 11(1)           |
| C(13) | 50(1)           | 41(1)           | 63(1)           | 20(1)           | 27(1)           | 18(1)           |
| C(14) | 49(1)           | 42(1)           | 48(1)           | 19(1)           | 23(1)           | 17(1)           |
| C(15) | 35(1)           | 32(1)           | 45(1)           | 14(1)           | 18(1)           | 9(1)            |
| C(16) | 43(1)           | 34(1)           | 66(1)           | 13(1)           | 16(1)           | 4(1)            |
| C(17) | 52(1)           | 34(1)           | 111(2)          | 23(1)           | 38(2)           | 7(1)            |
| C(18) | 85(2)           | 50(1)           | 111(2)          | 49(2)           | 68(2)           | 32(1)           |
| C(19) | 91(2)           | 63(2)           | 68(2)           | 41(1)           | 50(2)           | 38(1)           |
| C(20) | 61(1)           | 46(1)           | 47(1)           | 19(1)           | 26(1)           | 19(1)           |
| C(21) | 37(1)           | 30(1)           | 45(1)           | 12(1)           | 9(1)            | 6(1)            |
| C(22) | 41(1)           | 31(1)           | 39(1)           | 12(1)           | 13(1)           | 6(1)            |
| O(1)  | 52(1)           | 33(1)           | 41(1)           | 12(1)           | 16(1)           | 3(1)            |
| C(23) | 48(1)           | 39(1)           | 44(1)           | 7(1)            | 17(1)           | 0(1)            |
| O(2)  | 80(1)           | 37(1)           | 57(1)           | 9(1)            | 34(1)           | 7(1)            |
| C(24) | 72(2)           | 56(1)           | 45(1)           | 11(1)           | 23(1)           | -4(1)           |
| C(25) | 37(1)           | 34(1)           | 45(1)           | 9(1)            | 15(1)           | 4(1)            |



|       |       |       |       |       |       |       |
|-------|-------|-------|-------|-------|-------|-------|
| O(3)  | 38(1) | 38(1) | 51(1) | 0(1)  | 14(1) | 1(1)  |
| C(26) | 43(1) | 36(1) | 32(1) | 8(1)  | 10(1) | 2(1)  |
| C(27) | 42(1) | 49(1) | 43(1) | 8(1)  | 11(1) | 3(1)  |
| C(28) | 46(1) | 55(1) | 50(1) | 11(1) | 3(1)  | -6(1) |
| C(29) | 66(2) | 43(1) | 55(1) | 4(1)  | -1(1) | -4(1) |
| C(30) | 65(2) | 45(1) | 57(1) | -2(1) | 8(1)  | 11(1) |
| C(31) | 47(1) | 43(1) | 46(1) | 6(1)  | 13(1) | 6(1)  |

Table 5. Hydrogen coordinates ( $\times 10^4$ ) and isotropic displacement parameters ( $\text{\AA}^2 \times 10^{-3}$ ) for Raju505\_sq.

|        | x        | y        | z       | U(eq) |
|--------|----------|----------|---------|-------|
| H(1)   | 2080(20) | -100(20) | 650(20) | 49(6) |
| H(4)   | -270     | -737     | 3813    | 47    |
| H(5)   | -718     | 1157     | 4030    | 52    |
| H(6)   | -100     | 2414     | 2882    | 48    |
| H(10)  | 2459     | -1400    | -673    | 48    |
| H(11)  | 3584     | -2607    | -1666   | 54    |
| H(12)  | 4168     | -4274    | -1026   | 54    |
| H(13)  | 3679     | -4710    | 656     | 57    |
| H(14)  | 2614     | -3481    | 1698    | 51    |
| H(16)  | -362     | -3873    | 1063    | 58    |
| H(17)  | -690     | -5534    | 1846    | 74    |
| H(18)  | 241      | -5435    | 3851    | 82    |
| H(19)  | 1507     | -3679    | 5093    | 76    |
| H(20)  | 1860     | -2010    | 4327    | 57    |
| H(21A) | 671      | 2764     | 1216    | 45    |
| H(21B) | 787      | 1642     | 327     | 45    |
| H(22)  | 3196     | 1956     | 1680    | 43    |
| H(24A) | 2531     | 1797     | -2263   | 87    |
| H(24B) | 4082     | 2369     | -1579   | 87    |
| H(24C) | 2928     | 3127     | -1549   | 87    |
| H(25A) | 2717     | 4315     | 2073    | 46    |
| H(25B) | 2853     | 3567     | 3075    | 46    |

|       |      |      |      |    |
|-------|------|------|------|----|
| H(27) | 7067 | 4866 | 3251 | 55 |
| H(28) | 8235 | 6708 | 4383 | 65 |
| H(29) | 7089 | 8024 | 5218 | 73 |
| H(30) | 4765 | 7477 | 4934 | 71 |
| H(31) | 3567 | 5636 | 3795 | 55 |

Table 6. Torsion angles [°] for Raju505\_sq.

|                      |             |
|----------------------|-------------|
| C(8)-N(1)-C(1)-C(2)  | 1.1(2)      |
| C(8)-N(1)-C(1)-C(9)  | -176.54(16) |
| N(1)-C(1)-C(2)-C(3)  | -1.5(2)     |
| C(9)-C(1)-C(2)-C(3)  | 175.71(18)  |
| N(1)-C(1)-C(2)-C(15) | 177.98(18)  |
| C(9)-C(1)-C(2)-C(15) | -4.8(3)     |
| C(1)-C(2)-C(3)-C(4)  | 179.3(2)    |
| C(15)-C(2)-C(3)-C(4) | -0.2(3)     |
| C(1)-C(2)-C(3)-C(8)  | 1.4(2)      |
| C(15)-C(2)-C(3)-C(8) | -178.12(17) |
| C(8)-C(3)-C(4)-C(5)  | 0.0(3)      |
| C(2)-C(3)-C(4)-C(5)  | -177.8(2)   |
| C(3)-C(4)-C(5)-C(6)  | 0.6(3)      |
| C(4)-C(5)-C(6)-C(7)  | -0.6(3)     |
| C(5)-C(6)-C(7)-C(8)  | 0.1(3)      |
| C(5)-C(6)-C(7)-C(21) | 176.98(18)  |
| C(1)-N(1)-C(8)-C(7)  | -178.60(18) |
| C(1)-N(1)-C(8)-C(3)  | -0.2(2)     |
| C(6)-C(7)-C(8)-N(1)  | 178.72(18)  |
| C(21)-C(7)-C(8)-N(1) | 1.7(3)      |
| C(6)-C(7)-C(8)-C(3)  | 0.5(3)      |
| C(21)-C(7)-C(8)-C(3) | -176.53(17) |
| C(4)-C(3)-C(8)-N(1)  | -179.07(17) |
| C(2)-C(3)-C(8)-N(1)  | -0.8(2)     |
| C(4)-C(3)-C(8)-C(7)  | -0.5(3)     |
| C(2)-C(3)-C(8)-C(7)  | 177.80(17)  |
| N(1)-C(1)-C(9)-C(10) | -16.8(3)    |
| C(2)-C(1)-C(9)-C(10) | 166.26(19)  |

|                         |             |
|-------------------------|-------------|
| N(1)-C(1)-C(9)-C(14)    | 161.43(18)  |
| C(2)-C(1)-C(9)-C(14)    | -15.5(3)    |
| C(14)-C(9)-C(10)-C(11)  | 0.7(3)      |
| C(1)-C(9)-C(10)-C(11)   | 178.92(18)  |
| C(9)-C(10)-C(11)-C(12)  | 0.7(3)      |
| C(10)-C(11)-C(12)-C(13) | -1.1(3)     |
| C(11)-C(12)-C(13)-C(14) | 0.0(3)      |
| C(12)-C(13)-C(14)-C(9)  | 1.4(3)      |
| C(10)-C(9)-C(14)-C(13)  | -1.7(3)     |
| C(1)-C(9)-C(14)-C(13)   | -179.98(19) |
| C(1)-C(2)-C(15)-C(20)   | 121.4(2)    |
| C(3)-C(2)-C(15)-C(20)   | -59.2(3)    |
| C(1)-C(2)-C(15)-C(16)   | -59.8(3)    |
| C(3)-C(2)-C(15)-C(16)   | 119.7(2)    |
| C(20)-C(15)-C(16)-C(17) | -2.0(3)     |
| C(2)-C(15)-C(16)-C(17)  | 179.11(19)  |
| C(15)-C(16)-C(17)-C(18) | 1.1(3)      |
| C(16)-C(17)-C(18)-C(19) | 0.2(4)      |
| C(17)-C(18)-C(19)-C(20) | -0.4(4)     |
| C(16)-C(15)-C(20)-C(19) | 1.8(3)      |
| C(2)-C(15)-C(20)-C(19)  | -179.29(19) |
| C(18)-C(19)-C(20)-C(15) | -0.6(3)     |
| C(6)-C(7)-C(21)-C(22)   | 110.9(2)    |
| C(8)-C(7)-C(21)-C(22)   | -72.3(2)    |
| C(7)-C(21)-C(22)-O(1)   | 156.93(15)  |
| C(7)-C(21)-C(22)-C(25)  | -86.26(19)  |
| C(25)-C(22)-O(1)-C(23)  | 160.38(16)  |
| C(21)-C(22)-O(1)-C(23)  | -79.6(2)    |
| C(22)-O(1)-C(23)-O(2)   | -3.8(3)     |
| C(22)-O(1)-C(23)-C(24)  | 175.43(17)  |
| O(1)-C(22)-C(25)-O(3)   | -68.52(18)  |
| C(21)-C(22)-C(25)-O(3)  | 173.12(14)  |
| C(22)-C(25)-O(3)-C(26)  | 169.79(15)  |
| C(25)-O(3)-C(26)-C(31)  | 6.1(3)      |
| C(25)-O(3)-C(26)-C(27)  | -173.87(17) |
| O(3)-C(26)-C(27)-C(28)  | 178.42(18)  |
| C(31)-C(26)-C(27)-C(28) | -1.5(3)     |

|                         |             |
|-------------------------|-------------|
| C(26)-C(27)-C(28)-C(29) | 0.6(3)      |
| C(27)-C(28)-C(29)-C(30) | 0.5(4)      |
| C(28)-C(29)-C(30)-C(31) | -0.7(4)     |
| O(3)-C(26)-C(31)-C(30)  | -178.56(19) |
| C(27)-C(26)-C(31)-C(30) | 1.4(3)      |
| C(29)-C(30)-C(31)-C(26) | -0.3(4)     |

---

Symmetry transformations used to generate equivalent atoms:
